# Supplementary material
Source: Research Square preprint supplement (doi:10.21203/rs.3.rs-8928788/v1)
Supplement: Supplementary file 1 [file 27eb33eb9fbd57f57616c550.xlsx]

## Sheet: Sayfa1
Sex	k	Subtype	Metric	n	Mean	SD	Median
male	2	0	circularity	59	0.884168	0.112191	0.912158
male	2	0	radial_cv	59	0.077302	0.035924	0.070467
male	2	0	roughness	59	0.015755	0.055449	0.003797
male	2	0	lr_asymmetry	59	0.061339	0.04428	0.049043
male	2	0	ap_asymmetry	59	0.057071	0.036062	0.045781
male	2	0	fm_index	59	1.14514	0.077159	1.14715
male	2	0	fitz_rmse_mm	56	0.850388	0.51509	0.745007
male	2	0	area_perimeter_ratio	59	7.50724	1.02366	7.61541
male	2	1	circularity	175	0.914264	0.053741	0.92213
male	2	1	radial_cv	175	0.075319	0.025931	0.073375
male	2	1	roughness	175	0.005597	0.018071	0.003217
male	2	1	lr_asymmetry	175	0.049543	0.024524	0.044138
male	2	1	ap_asymmetry	175	0.049581	0.024944	0.043516
male	2	1	fm_index	175	1.1766	0.081363	1.17571
male	2	1	fitz_rmse_mm	173	0.726967	0.349671	0.66246
male	2	1	area_perimeter_ratio	175	7.76797	0.770075	7.72779
male	3	0	circularity	13	0.905341	0.077116	0.934441
male	3	0	radial_cv	13	0.062616	0.027714	0.051385
male	3	0	roughness	13	0.007596	0.013867	0.003612
male	3	0	lr_asymmetry	13	0.056625	0.026129	0.048272
male	3	0	ap_asymmetry	13	0.057614	0.033374	0.047121
male	3	0	fm_index	13	1.05862	0.09097	1.01819
male	3	0	fitz_rmse_mm	12	0.771499	0.295859	0.734196
male	3	0	area_perimeter_ratio	13	7.79565	0.772281	7.9119
male	3	1	circularity	51	0.883878	0.115633	0.911912
male	3	1	radial_cv	51	0.078602	0.036761	0.070467
male	3	1	roughness	51	0.01659	0.059318	0.003787
male	3	1	lr_asymmetry	51	0.060609	0.046367	0.048214
male	3	1	ap_asymmetry	51	0.054959	0.035843	0.04545
male	3	1	fm_index	51	1.16088	0.064994	1.15274
male	3	1	fitz_rmse_mm	48	0.847977	0.543494	0.740537
male	3	1	area_perimeter_ratio	51	7.50406	1.05715	7.64934
male	3	2	circularity	170	0.913617	0.054278	0.921636
male	3	2	radial_cv	170	0.075994	0.025809	0.073531
male	3	2	roughness	170	0.005672	0.01833	0.003226
male	3	2	lr_asymmetry	170	0.049776	0.024806	0.044085
male	3	2	ap_asymmetry	170	0.049953	0.02517	0.044536
male	3	2	fm_index	170	1.17942	0.078829	1.17845
male	3	2	fitz_rmse_mm	169	0.730332	0.352722	0.666251
male	3	2	area_perimeter_ratio	170	7.75454	0.774386	7.70749
male	4	0	circularity	44	0.891675	0.091028	0.91671
male	4	0	radial_cv	44	0.07576	0.037437	0.065283
male	4	0	roughness	44	0.011745	0.035552	0.003324
male	4	0	lr_asymmetry	44	0.056056	0.037088	0.045455
male	4	0	ap_asymmetry	44	0.053218	0.03289	0.042144
male	4	0	fm_index	44	1.15674	0.097575	1.15159
male	4	0	fitz_rmse_mm	44	0.836806	0.588096	0.688963
male	4	0	area_perimeter_ratio	44	7.65776	0.772577	7.66316
male	4	1	circularity	16	0.837501	0.202225	0.923585
male	4	1	radial_cv	16	0.084201	0.063827	0.0594
male	4	1	roughness	16	0.044486	0.102645	0.003832
male	4	1	lr_asymmetry	16	0.082553	0.076456	0.049494
male	4	1	ap_asymmetry	16	0.076118	0.061043	0.048851
male	4	1	fm_index	16	1.07932	0.092798	1.03592
male	4	1	fitz_rmse_mm	15	1.09944	0.910017	0.745937
male	4	1	area_perimeter_ratio	16	7.31174	1.49347	7.70169
male	4	2	circularity	48	0.90515	0.040304	0.912035
male	4	2	radial_cv	48	0.072407	0.018824	0.070313
male	4	2	roughness	48	0.004856	0.006822	0.003779
male	4	2	lr_asymmetry	48	0.052215	0.019089	0.047979
male	4	2	ap_asymmetry	48	0.048625	0.016444	0.04501
male	4	2	fm_index	48	1.16038	0.066974	1.1492
male	4	2	fitz_rmse_mm	45	0.743763	0.206988	0.716548
male	4	2	area_perimeter_ratio	48	7.64714	0.786981	7.68293
male	4	3	circularity	126	0.921279	0.030069	0.924015
male	4	3	radial_cv	126	0.076075	0.020456	0.074134
male	4	3	roughness	126	0.003552	0.001398	0.00313
male	4	3	lr_asymmetry	126	0.047583	0.018439	0.043975
male	4	3	ap_asymmetry	126	0.048812	0.021894	0.045765
male	4	3	fm_index	126	1.18734	0.069872	1.18642
male	4	3	fitz_rmse_mm	125	0.692853	0.207812	0.658218
male	4	3	area_perimeter_ratio	126	7.78833	0.775233	7.72895
female	2	0	circularity	171	0.922711	0.035284	0.927613
female	2	0	radial_cv	171	0.076469	0.022472	0.074744
female	2	0	roughness	171	0.004247	0.016043	0.002792
female	2	0	lr_asymmetry	171	0.049586	0.021301	0.046865
female	2	0	ap_asymmetry	171	0.050302	0.02083	0.048477
female	2	0	fm_index	171	1.16351	0.090593	1.15686
female	2	0	fitz_rmse_mm	171	0.654814	0.215905	0.626748
female	2	0	area_perimeter_ratio	171	6.98463	0.549943	7.00003
female	2	1	circularity	68	0.920008	0.037811	0.927658
female	2	1	radial_cv	68	0.077087	0.020619	0.07447
female	2	1	roughness	68	0.004285	0.011309	0.002852
female	2	1	lr_asymmetry	68	0.058088	0.021368	0.054316
female	2	1	ap_asymmetry	68	0.057358	0.021255	0.053784
female	2	1	fm_index	68	1.15489	0.090622	1.14398
female	2	1	fitz_rmse_mm	67	0.703523	0.178938	0.672696
female	2	1	area_perimeter_ratio	68	6.92054	0.564801	7.0168
female	3	0	circularity	11	0.925496	0.020721	0.919507
female	3	0	radial_cv	11	0.06613	0.022845	0.063259
female	3	0	roughness	11	0.003007	0.001096	0.002548
female	3	0	lr_asymmetry	11	0.058662	0.019343	0.056391
female	3	0	ap_asymmetry	11	0.05752	0.017858	0.055851
female	3	0	fm_index	11	1.01586	0.092873	0.982117
female	3	0	fitz_rmse_mm	11	0.676956	0.126869	0.649546
female	3	0	area_perimeter_ratio	11	6.87046	0.70522	6.72179
female	3	1	circularity	162	0.922235	0.036008	0.927564
female	3	1	radial_cv	162	0.077406	0.022314	0.075322
female	3	1	roughness	162	0.004311	0.01648	0.002794
female	3	1	lr_asymmetry	162	0.049295	0.021441	0.046316
female	3	1	ap_asymmetry	162	0.050052	0.020974	0.048285
female	3	1	fm_index	162	1.17243	0.082328	1.16148
female	3	1	fitz_rmse_mm	162	0.655189	0.220458	0.625421
female	3	1	area_perimeter_ratio	162	6.98134	0.545809	7.00095
female	3	2	circularity	66	0.920628	0.038126	0.927683
female	3	2	radial_cv	66	0.076528	0.020627	0.073175
female	3	2	roughness	66	0.004337	0.011478	0.002877
female	3	2	lr_asymmetry	66	0.057545	0.021407	0.05389
female	3	2	ap_asymmetry	66	0.056983	0.021439	0.053491
female	3	2	fm_index	66	1.15735	0.08925	1.14398
female	3	2	fitz_rmse_mm	65	0.700341	0.179876	0.668037
female	3	2	area_perimeter_ratio	66	6.94569	0.553102	7.06594
female	4	0	circularity	153	0.924065	0.024757	0.927514
female	4	0	radial_cv	153	0.077119	0.02083	0.075406
female	4	0	roughness	153	0.003024	0.000955	0.002797
female	4	0	lr_asymmetry	153	0.048115	0.018187	0.045984
female	4	0	ap_asymmetry	153	0.049546	0.020298	0.048477
female	4	0	fm_index	153	1.17621	0.082622	1.16823
female	4	0	fitz_rmse_mm	153	0.642067	0.155114	0.626748
female	4	0	area_perimeter_ratio	153	6.99473	0.54489	7.00187
female	4	1	circularity	9	0.929256	0.023082	0.937557
female	4	1	radial_cv	9	0.066988	0.018544	0.063259
female	4	1	roughness	9	0.002568	0.000503	0.00245
female	4	1	lr_asymmetry	9	0.066548	0.012818	0.067474
female	4	1	ap_asymmetry	9	0.068249	0.0113	0.068965
female	4	1	fm_index	9	1.0442	0.078436	1.0113
female	4	1	fitz_rmse_mm	9	0.708738	0.102151	0.705825
female	4	1	area_perimeter_ratio	9	6.60088	0.515677	6.58038
female	4	2	circularity	60	0.919073	0.039368	0.927658
female	4	2	radial_cv	60	0.078371	0.020546	0.076633
female	4	2	roughness	60	0.004508	0.012032	0.002919
female	4	2	lr_asymmetry	60	0.05693	0.022016	0.05345
female	4	2	ap_asymmetry	60	0.055952	0.021881	0.052994
female	4	2	fm_index	60	1.16824	0.084209	1.15583
female	4	2	fitz_rmse_mm	59	0.702873	0.187063	0.672696
female	4	2	area_perimeter_ratio	60	6.96534	0.556031	7.09979
female	4	3	circularity	17	0.909085	0.084577	0.929364
female	4	3	radial_cv	17	0.071395	0.034657	0.064164
female	4	3	roughness	17	0.015376	0.050791	0.002792
female	4	3	lr_asymmetry	17	0.061935	0.038492	0.051468
female	4	3	ap_asymmetry	17	0.055888	0.025115	0.047437
female	4	3	fm_index	17	1.06127	0.084195	1.06469
female	4	3	fitz_rmse_mm	17	0.766167	0.501775	0.622249
female	4	3	area_perimeter_ratio	17	6.90854	0.617803	6.72179
