# Supplementary material
Source: Research Square preprint supplement (doi:10.21203/rs.3.rs-8928788/v1)
Supplement: Supplementary file 2 [file 28b1cbdffd637a32d6e886c4.xlsx]

## Sheet: Sayfa1
Specimen	Sex	Contour Points	AP Diameter (mm)	Transverse (mm)	Max Diameter (mm)	Min Diameter (mm)	Perimeter (mm)	Area (mm²)	FM Index	Circularity	Eccentricity	Area/Perim Ratio	Compactness	Radial CV	Roughness	L-R Asymmetry	AP Asymmetry	Fitz Semi-major	Fitz Semi-minor	Fitz RMSE (mm)	Fitz Area Ratio	Optimal Polygon	Optimal Poly RMSE (mm)
CASE-1	male	72	30.7203	27.025	30.7476	27.025	90.1772	603.649	1.1367	0.9328	1.1377	6.694	3.6703	0.0603	0.0036	0.0454	0.0452	36.8131	32.5189	0.5548	1.0095	6	1.3465
CASE-2	male	55	40.3791	33.6058	40.3791	33.6058	115.687	1002.26	1.2016	0.9411	1.2016	8.6635	3.6542	0.0619	0.003	0.021	0.0154	42.0242	35.7853	0.4437	1.0039	6	1.987
CASE-3	male	41	35.9069	29.822	36.1763	29.822	102.152	776.783	1.204	0.9354	1.2131	7.6042	3.6652	0.0701	0.0019	0.0359	0.0346	39.563	33.6855	0.6582	1.0111	6	1.2707
CASE-4	male	49	37.1595	32.3721	37.1762	32.3721	107.864	851.925	1.1479	0.9202	1.1484	7.8982	3.6955	0.0684	0.0021	0.0493	0.0544	43.2846	37.8939	0.8588	1.0143	6	2.0187
CASE-5	male	88	34.2162	29.2105	34.4226	29.2105	98.4678	720.454	1.1714	0.9337	1.1784	7.3166	3.6685	0.0642	0.0025	0.039	0.0415	39.5041	34.1286	0.5956	1.0094	7	1.0227
CASE-6	male	75	38.1501	32.5874	38.2593	32.5874	111.217	958.111	1.1707	0.9734	1.1741	8.6148	3.5931	0.0522	0.0019	0.0263	0.0143	43.2381	37.7285	0.3536	1.0025	7	2.1135
CASE-7	male	75	34.402	26.2748	34.535	26.2748	93.3817	651.746	1.3093	0.9392	1.3144	6.9794	3.6578	0.1031	0.0017	0.0335	0.0258	40.8037	31.2176	0.5333	1.008	4	3.0327
CASE-8	male	72	36.1393	31.7555	36.779	31.7555	106.418	848.835	1.138	0.9419	1.1582	7.9764	3.6526	0.0666	0.0024	0.0518	0.0557	40.6596	34.8528	0.6286	1.0096	6	1.7694
CASE-9	male	66	30.3797	26.0829	30.4691	26.0829	88.5761	601.562	1.1647	0.9635	1.1682	6.7915	3.6114	0.0636	0.0016	0.0412	0.0251	35.552	30.4723	0.4597	1.0067	6	1.3101
CASE-10	male	90	42.8625	32.4069	42.9185	32.4069	120.564	1049.96	1.3226	0.9077	1.3244	8.7087	3.7207	0.0987	0.005	0.0419	0.039	47.9686	36.8325	0.5754	1.0053	7	1.4375
CASE-11	male	70	36.6312	32.9615	36.6554	32.9615	106.656	877.535	1.1113	0.9694	1.1121	8.2277	3.6004	0.0482	0.0019	0.0147	0.0171	41.6282	36.985	0.429	1.0041	4	3.0813
CASE-12	male	85	36.685	32.9102	36.7507	32.9102	107.172	864.069	1.1147	0.9454	1.1167	8.0625	3.6459	0.0495	0.0026	0.0329	0.0286	37.9035	35.1981	0.7151	1.011	6	1.5352
CASE-13	male	83	33.2673	32.2832	33.3235	32.2832	102.233	806.37	1.0305	0.9695	1.0322	7.8876	3.6002	0.0324	0.002	0.0417	0.0391	37.2187	36.2882	0.4998	1.0064	6	1.3699
CASE-14	male	75	37.753	31.194	37.9618	31.194	108.792	900.97	1.2103	0.9566	1.217	8.2816	3.6244	0.0659	0.0024	0.0385	0.0579	42.0087	35.675	0.53	1.006	6	1.5398
CASE-15	male	47	33.402	29.1449	33.406	29.1449	96.1887	681.795	1.1461	0.926	1.1462	7.0881	3.6838	0.0737	0.0027	0.0611	0.0663	36.7426	31.4647	0.6867	1.0132	6	1.2284
CASE-16	male	62	33.3251	31.6417	33.8207	31.6417	101.839	783.793	1.0532	0.9497	1.0689	7.6964	3.6376	0.0417	0.003	0.0496	0.0393	36.7864	34.135	0.5208	1.0062	5	1.5696
CASE-17	male	75	33.7423	26.8971	34.2032	26.8971	95.5301	666.748	1.2545	0.9181	1.2716	6.9795	3.6996	0.0927	0.0037	0.0439	0.0464	38.2986	30.226	0.5557	1.0087	4	3.4377
CASE-18	male	68	40.6138	34.9245	40.7146	34.9245	117.121	1046.06	1.1629	0.9583	1.1658	8.9315	3.6212	0.0611	0.002	0.0566	0.0658	45.3996	39.8417	0.732	1.0095	5	3.0653
CASE-19	male	72	40.8512	35.4384	41.0474	35.4384	123.434	1112.24	1.1527	0.9174	1.1583	9.0109	3.7011	0.0697	0.0025	0.0671	0.0414	44.9964	39.6384	0.9838	1.0184	6	1.5252
CASE-20	male	70	36.0364	29.092	36.1566	29.092	104.417	774.089	1.2387	0.8922	1.2428	7.4135	3.753	0.0924	0.0034	0.0734	0.0409	37.3882	29.7565	0.8244	1.0195	6	1.6798
CASE-21	male	71	36.8248	33.6357	37.4514	33.6357	109.955	903.785	1.0948	0.9394	1.1134	8.2196	3.6575	0.0502	0.0033	0.035	0.0407	37.5367	33.4294	0.4827	1.005	4	3.483
CASE-22	male	67	34.1696	33.8932	36.0944	33.8932	108.398	878.237	1.0082	0.9392	1.0649	8.1019	3.6578	0.0365	0.003	0.035	0.0374	35.5991	34.2365	0.5768	1.0072	6	1.3319
CASE-23	male	67	41.2995	32.5429	41.2996	32.5429	116.786	1020.8	1.2691	0.9405	1.2691	8.7408	3.6553	0.0761	0.0037	0.0247	0.0343	39.0167	31.6931	0.3831	1.0027	7	1.8713
CASE-24	male	60	32.1136	31.8596	32.9587	31.8596	101.473	765.67	1.008	0.9344	1.0345	7.5456	3.6672	0.0399	0.0025	0.04	0.0608	39.1509	37.4553	0.5703	1.0072	6	1.0412
CASE-25	male	73	36.6785	30.8231	37.1883	30.8231	103.67	779.932	1.19	0.9119	1.2065	7.5232	3.7121	0.0768	0.0037	0.0629	0.0435	38.815	33.4027	0.8544	1.0185	6	1.0552
CASE-26	male	83	33.4761	29.5104	33.7992	29.5104	97.4422	689.618	1.1344	0.9127	1.1453	7.0772	3.7106	0.0707	0.0037	0.0435	0.0334	33.5713	28.3335	0.6038	1.0104	6	1.2709
CASE-27	male	65	35.3182	29.7745	35.5772	29.7745	102.84	775.236	1.1862	0.9211	1.1949	7.5383	3.6935	0.0756	0.003	0.0584	0.0604	39.374	33.0937	0.6532	1.0106	6	1.234
CASE-28	male	65	34.5729	27.5741	34.7759	27.5741	96.7706	710.34	1.2538	0.9532	1.2612	7.3404	3.6309	0.0866	0.0021	0.0355	0.022	34.5022	27.3784	0.4084	1.0044	7	1.7284
CASE-29	male	79	35.2321	31.9393	35.2441	31.9393	103.162	814.866	1.1031	0.9622	1.1035	7.8989	3.6139	0.0457	0.0026	0.0272	0.0366	38.9651	35.3678	0.4808	1.0052	4	3.0106
CASE-30	male	66	36.7224	30.2046	36.8346	30.2046	105.021	840.388	1.2158	0.9575	1.2195	8.0021	3.6227	0.0705	0.002	0.0207	0.0249	41.5863	34.4546	0.3752	1.0031	7	1.5747
CASE-31	male	71	35.0512	29.3824	35.4292	29.3824	98.3651	725.154	1.1929	0.9418	1.2058	7.3721	3.6528	0.0783	0.0022	0.0553	0.0514	38.0353	32.0752	0.7246	1.0142	6	1.2222
CASE-32	male	78	37.1422	33.3816	37.3825	33.3816	111.277	940.837	1.1127	0.9548	1.1199	8.4549	3.6279	0.0486	0.0026	0.0418	0.0479	42.0936	37.7892	0.539	1.0055	6	1.3032
CASE-33	male	78	34.2065	30.8074	34.6663	30.8074	101.219	754.748	1.1103	0.9257	1.1253	7.4566	3.6844	0.0778	0.0031	0.0667	0.0665	39.3119	33.5348	0.8057	1.0152	5	1.7687
CASE-34	male	62	34.1282	29.6277	34.68	29.6277	98.1835	724.837	1.1519	0.9449	1.1705	7.3825	3.6469	0.0666	0.0021	0.0418	0.0341	38.4189	33.4143	0.662	1.0114	6	1.6567
CASE-35	male	79	36.9073	31.5215	37.1337	31.5215	104.788	810.684	1.1709	0.9278	1.178	7.7364	3.6803	0.0762	0.0028	0.0514	0.038	40.4415	34.3263	0.7944	1.0155	4	2.7549
CASE-36	male	85	37.5601	30.9312	37.7897	30.9312	108.704	840.296	1.2143	0.8936	1.2217	7.7301	3.75	0.0717	0.0037	0.0405	0.0374	39.2669	33.7722	0.8008	1.0131	6	1.7554
CASE-37	male	66	36.5804	29.8616	36.6077	29.8616	102.354	773.542	1.225	0.9279	1.2259	7.5575	3.6801	0.0832	0.0026	0.0482	0.0508	37.8491	31.162	0.7056	1.0119	6	1.7428
CASE-38	male	72	34.6239	29.1441	34.8554	29.1441	98.8691	699.025	1.188	0.8986	1.196	7.0702	3.7395	0.076	0.003	0.0617	0.0542	36.2695	31.5524	0.8549	1.0212	6	1.1311
CASE-39	male	75	39.7446	30.4575	40.0999	30.4575	109.294	875.211	1.3049	0.9207	1.3166	8.0079	3.6944	0.1028	0.0031	0.028	0.0312	46.3582	35.2459	0.5525	1.0055	7	1.8188
CASE-40	male	64	33.7467	29.2329	33.7467	29.2329	98.7608	725.525	1.1544	0.9347	1.1544	7.3463	3.6666	0.0614	0.0018	0.0534	0.0373	37.1183	32.7373	0.6783	1.0114	6	1.0744
CASE-41	male	72	35.1428	32.965	35.4179	32.965	104.714	817.79	1.0661	0.9372	1.0744	7.8097	3.6617	0.0463	0.0021	0.0406	0.0278	38.3255	36.3237	0.6816	1.0115	6	1.2906
CASE-42	male	54	38.5696	32.8528	39.1278	32.8528	113.911	965.88	1.174	0.9354	1.191	8.4792	3.6653	0.0582	0.0021	0.0428	0.0381	43.4323	38.2419	0.6449	1.009	7	0.8419
CASE-43	male	69	36.9314	35.4928	37.2171	35.4928	111.377	903.888	1.0405	0.9157	1.0486	8.1156	3.7046	0.0595	0.0032	0.0566	0.0555	41.8486	38.5441	0.8635	1.0143	4	2.7019
CASE-44	male	36	34.6183	33.4193	35.0226	33.4193	106.099	869.417	1.0359	0.9705	1.048	8.1944	3.5983	0.0406	0.0012	0.052	0.0512	38.1784	36.7726	0.6359	1.0092	6	1.9074
CASE-45	male	49	37.176	34.3777	37.3451	34.3777	108.572	890.804	1.0814	0.9496	1.0863	8.2048	3.6377	0.0553	0.0017	0.0471	0.038	35.0289	32.4258	0.8083	1.014	5	1.8136
CASE-46	male	69	34.5883	33.5954	35.0724	33.5954	106.312	871.348	1.0296	0.9688	1.044	8.1961	3.6015	0.0492	0.0023	0.0676	0.0541	41.5551	38.365	0.6691	1.0095	7	1.8054
CASE-47	male	73	40.9592	34.6546	41.6165	34.6546	121.615	1116.67	1.1819	0.9488	1.2009	9.182	3.6394	0.0684	0.0027	0.0356	0.0375	48.4341	40.4899	0.5148	1.0051	6	2.3013
CASE-48	male	76	38.5467	35.3526	38.6903	35.3526	113.72	981.641	1.0904	0.9539	1.0944	8.6321	3.6296	0.0441	0.0024	0.0307	0.027	48.0579	45.3389	0.7114	1.0104	4	2.9795
CASE-49	male	72	41.8819	35.2391	42.1904	35.2391	119.035	1082.17	1.1885	0.9597	1.1973	9.0912	3.6185	0.0681	0.0026	0.0332	0.0282	45.8792	38.684	0.5676	1.0057	6	2.7901
CASE-50	male	79	41.2254	32.4839	41.2281	32.4839	117.052	932.366	1.2691	0.8551	1.2692	7.9654	3.8334	0.0968	0.0057	0.0453	0.0402	43.7162	34.5815	0.8171	1.0162	5	1.9086
CASE-51	male	71	37.0275	29.7432	37.0752	29.7432	103.808	816.005	1.2449	0.9516	1.2465	7.8607	3.634	0.0798	0.0026	0.0314	0.0296	53.318	43.056	0.3907	1.0036	7	1.6779
CASE-52	male	65	41.4486	34.7759	41.8406	34.7759	118.008	1055.59	1.1919	0.9525	1.2031	8.945	3.6322	0.0779	0.0021	0.0329	0.0404	62.3499	50.8851	0.5518	1.0054	7	1.1697
CASE-53	male	66	39.1457	34.1035	39.3881	34.1035	112.55	957.023	1.1478	0.9494	1.155	8.5031	3.6382	0.0568	0.0029	0.0282	0.0331	49.6946	43.8527	0.617	1.0076	6	1.5856
CASE-54	male	79	37.3099	30.5257	37.3251	30.5257	105.962	837.875	1.2222	0.9377	1.2227	7.9073	3.6607	0.0815	0.0028	0.0533	0.0333	52.5759	42.997	0.6663	1.0101	6	1.7599
CASE-55	male	72	36.5486	28.5242	36.6061	28.5242	98.27	704.699	1.2813	0.917	1.2833	7.171	3.7019	0.1035	0.0026	0.0619	0.0503	40.9819	32.1357	0.793	1.0181	6	1.0196
CASE-56	male	73	41.7031	34.28	41.7453	34.28	116.499	1028.52	1.2165	0.9523	1.2178	8.8286	3.6326	0.0741	0.0021	0.0573	0.0603	57.383	48.1771	0.737	1.0103	6	2.6201
CASE-57	male	61	35.3587	27.4587	36.0176	27.4587	99.1406	716.978	1.2877	0.9167	1.3117	7.2319	3.7025	0.1106	0.0022	0.0319	0.0354	40.6266	30.3059	0.5218	1.0062	7	1.4357
CASE-58	male	72	34.249	31.5811	34.2519	31.5811	100.733	777.519	1.0845	0.9629	1.0846	7.7186	3.6126	0.0417	0.0024	0.0204	0.0167	46.4604	42.8451	0.488	1.0057	4	2.9428
CASE-59	male	83	39.2085	33.3488	39.6164	33.3488	112.813	960.342	1.1757	0.9482	1.1879	8.5127	3.6404	0.078	0.0025	0.0695	0.057	55.1765	46.1468	0.7615	1.0113	6	2.5016
CASE-60	male	73	36.5528	32.0328	36.8028	32.0328	106.008	836.311	1.1411	0.9352	1.1489	7.8892	3.6657	0.0686	0.0023	0.0702	0.084	41.5938	36.8059	0.854	1.0165	6	1.5269
CASE-61	male	85	37.1662	29.8318	37.2668	29.8318	103.216	760.764	1.2459	0.8974	1.2492	7.3706	3.7422	0.1016	0.0026	0.054	0.0592	50.3121	40.0221	0.8874	1.0189	6	1.1428
CASE-62	male	87	34.7346	35.0486	36.2294	34.7346	107.382	874.566	0.991	0.9531	1.043	8.1444	3.6311	0.0505	0.0029	0.0494	0.0424	50.4164	45.8265	0.6605	1.0101	5	2.7054
CASE-63	male	77	38.3082	37.6237	38.9659	37.6237	118.673	1070.05	1.0182	0.9548	1.0357	9.0168	3.6279	0.0488	0.0022	0.0702	0.0892	56.1901	54.2111	0.8837	1.0136	6	1.6703
CASE-64	male	101	35.6739	29.4841	36.0652	29.4841	100.734	732.58	1.2099	0.9072	1.2232	7.2724	3.7218	0.0962	0.0031	0.0574	0.0576	48.8167	39.4659	0.8788	1.0188	6	1.199
CASE-65	male	63	34.9168	30.9454	34.9812	30.9454	104.608	772.478	1.1283	0.8871	1.1304	7.3845	3.7637	0.0547	0.0038	0.0407	0.0592	48.169	43.146	0.5902	1.0104	6	1.52
CASE-66	male	66	39.1662	32.3133	39.1802	32.3133	109.931	910.562	1.2121	0.9468	1.2125	8.283	3.6431	0.076	0.0026	0.0389	0.0404	53.9528	44.7426	0.6038	1.0075	4	3.6365
CASE-67	male	79	34.1591	26.1052	34.1709	26.1052	94.8899	607.565	1.3085	0.8479	1.309	6.4028	3.8497	0.1116	0.0058	0.0363	0.0421	46.1962	34.8233	0.5865	1.0138	6	1.6333
CASE-68	male	92	38.9101	31.3657	38.9663	31.3657	110.54	894.427	1.2405	0.9199	1.2423	8.0914	3.6961	0.0707	0.0041	0.041	0.0395	53.1868	44.7971	0.6349	1.0098	6	1.3971
CASE-69	male	70	35.7608	28.8311	36.3493	28.8311	99.5793	717.14	1.2404	0.9088	1.2608	7.2017	3.7185	0.0973	0.0031	0.0387	0.0484	49.4083	38.786	0.641	1.0116	6	1.3862
CASE-70	male	62	38.9242	31.7666	39.1613	31.7666	109.345	901.33	1.2253	0.9473	1.2328	8.243	3.6421	0.079	0.0023	0.0422	0.0569	54.0715	44.2571	0.5831	1.0071	6	2.2715
CASE-71	male	62	38.8253	32.2795	38.8531	32.2795	109.756	891.111	1.2028	0.9296	1.2036	8.119	3.6767	0.0753	0.0028	0.0438	0.054	51.9033	43.4255	0.6625	1.0098	6	1.4292
CASE-72	male	59	38.1578	29.4975	38.4462	29.4975	107.551	884.015	1.2936	0.9604	1.3034	8.2195	3.6173	0.088	0.0014	0.029	0.0319	55.3428	43.3646	0.3626	1.003	4	4.1172
CASE-73	male	64	34.7073	30.4073	34.7519	30.4073	101.112	781.692	1.1414	0.9608	1.1429	7.731	3.6165	0.0509	0.0023	0.0363	0.0484	47.6805	42.3083	0.4411	1.0045	5	3.1808
CASE-74	male	52	33.3189	28.7974	33.8091	28.7974	96.7635	695.971	1.157	0.9341	1.174	7.1925	3.6679	0.0688	0.0024	0.0586	0.0674	46.6893	39.8169	0.6066	1.0103	5	2.3112
CASE-75	male	52	40.9386	34.4992	41.1598	34.4992	115.515	982.774	1.1867	0.9255	1.1931	8.5077	3.6848	0.0812	0.0019	0.0868	0.0746	54.934	47.2028	1.0723	1.0224	6	1.5158
CASE-76	male	69	32.6106	26.942	32.6168	26.942	92.0734	634.601	1.2104	0.9407	1.2106	6.8923	3.655	0.0737	0.0028	0.048	0.0552	45.2972	37.7169	0.4901	1.0072	6	1.9255
CASE-77	male	59	38.2297	29.738	38.2303	29.738	105.24	817.763	1.2856	0.9279	1.2856	7.7705	3.6801	0.0933	0.0021	0.0481	0.0666	52.4034	41.5344	0.6775	1.0094	7	1.9976
CASE-78	male	70	35.2274	32.367	35.2683	32.367	105.037	814.915	1.0884	0.9282	1.0896	7.7584	3.6795	0.0598	0.0031	0.0533	0.0411	48.8422	43.9618	0.7722	1.0127	6	1.8937
CASE-79	male	52	35.5114	30.6805	35.5991	30.6805	103.849	798.179	1.1575	0.93	1.1603	7.6859	3.6758	0.0486	0.0025	0.0427	0.045	47.9011	44.1577	0.6366	1.0099	6	0.9397
CASE-80	male	62	41.7093	35.9035	41.9862	35.9035	120.853	1093.56	1.1617	0.9409	1.1694	9.0487	3.6546	0.0672	0.0034	0.0494	0.0446	57.9088	49.2271	0.6454	1.0073	4	4.2212
CASE-81	male	59	33.8809	30.7219	34.4104	30.7219	99.1276	707.905	1.1028	0.9053	1.1201	7.1414	3.7257	0.0718	0.0031	0.0356	0.0416	45.1891	40.7251	0.9318	1.0228	4	2.0958
CASE-82	male	65	35.6782	33.8576	36.067	33.8576	109.806	884.088	1.0538	0.9214	1.0653	8.0513	3.693	0.0506	0.005	0.0577	0.0549	49.6171	45.8175	0.7069	1.0111	6	1.8389
CASE-83	male	62	34.7719	28.5599	34.7859	28.5599	98.4748	731.574	1.2175	0.948	1.218	7.429	3.6408	0.0668	0.0027	0.0238	0.0256	40.9047	34.2891	0.3584	1.0035	6	2.1522
CASE-84	male	56	37.8173	31.2942	38.3868	31.2942	108.321	887.721	1.2084	0.9507	1.2266	8.1953	3.6356	0.0891	0.0021	0.032	0.0271	62.9402	49.2126	0.3715	1.0031	8	1.0296
CASE-85	male	73	34.306	30.1683	34.3179	30.1683	99.0335	726.907	1.1372	0.9314	1.1375	7.34	3.6732	0.0592	0.0036	0.0372	0.0311	46.4455	41.1615	0.6141	1.0102	6	1.1265
CASE-86	male	64	35.4892	30.0018	36.5512	30.0018	104.478	797.204	1.1829	0.9178	1.2183	7.6303	3.7003	0.085	0.0029	0.0372	0.0237	51.7667	41.6986	0.5533	1.0075	6	1.5787
CASE-87	male	75	33.226	28.8784	33.4939	28.8784	96.5046	684.797	1.1505	0.924	1.1598	7.096	3.6878	0.0743	0.0033	0.0325	0.0161	51.9126	39.4477	1.0615	1.0277	7	1.1314
CASE-88	male	65	35.4085	27.6595	35.7024	27.6595	100.971	695.557	1.2802	0.8573	1.2908	6.8887	3.8285	0.1227	0.0038	0.0975	0.067
CASE-89	male	60	45.6252	34.1009	45.7663	34.1009	125.89	1140.91	1.3379	0.9047	1.3421	9.0628	3.727	0.1281	0.0026	0.0975	0.1027	50.1491	36.6296	1.162	1.0234	6	2.2139
CASE-90	male	53	31.2562	29.8888	32.4787	29.8888	97.4189	719.861	1.0457	0.9532	1.0867	7.3893	3.6309	0.0378	0.0025	0.0372	0.0387	45.3263	42.0369	0.4	1.0045	4	3.097
CASE-91	male	67	38.8859	35.9972	38.936	35.9972	118.034	1041.24	1.0802	0.9392	1.0816	8.8215	3.6579	0.049	0.0039	0.0236	0.0193	55.4132	49.066	0.4498	1.0054	4	3.3865
CASE-92	male	60	32.6892	31.6241	32.7071	31.6241	102.094	769.396	1.0337	0.9276	1.0342	7.5361	3.6807	0.04	0.0019	0.0592	0.0593	46.4598	45.4752	0.622	1.011	5	1.6932
CASE-93	male	62	32.1008	32.2739	32.8456	32.1008	100.42	733.407	0.9946	0.9139	1.0232	7.3034	3.7081	0.0709	0.0036	0.0702	0.0524	47.6774	41.6581	0.817	1.0169	5	2.0405
CASE-94	male	64	35.9102	28.8898	36.0587	28.8898	100.056	737.783	1.243	0.9261	1.2481	7.3737	3.6837	0.0898	0.0032	0.038	0.0319	49.1386	39.0367	0.5202	1.0074	6	1.7449
CASE-95	male	53	37.1196	29.0892	37.4657	29.0892	102.177	769.194	1.2761	0.9258	1.288	7.5281	3.6841	0.086	0.0025	0.0378	0.0399	48.9826	44.1996	0.7165	1.0115	6	1.4289
CASE-96	male	79	35.5163	27.3749	35.5598	27.3749	97.675	681.979	1.2974	0.8983	1.299	6.9821	3.7402	0.0999	0.0033	0.061	0.0537	48.3229	38.4076	0.843	1.0185	6	1.2996
CASE-97	male	98	32.8164	29.5536	33.4423	29.5536	106.378	690.284	1.1104	0.7665	1.1316	6.489	4.0489	0.0635	0.0116	0.0532	0.0507	47.5875	41.8565	0.6996	1.0108	6	1.3405
CASE-98	male	81	36.1511	29.2887	36.1888	29.2887	102.353	760.933	1.2343	0.9128	1.2356	7.4344	3.7104	0.0775	0.0035	0.0431	0.0384	49.8394	41.1121	0.6146	1.01	6	1.2983
CASE-99	male	104	37.0607	29.7985	37.1059	29.7985	106.867	786.782	1.2437	0.8657	1.2452	7.3623	3.8099	0.0796	0.0051	0.0687	0.0701	50.3277	42.2681	0.8188	1.0197	6	1.17
CASE-100	male	113	39.3044	33.1751	39.3441	33.1751	111.83	909.938	1.1848	0.9143	1.186	8.1368	3.7073	0.0742	0.004	0.0622	0.0807	52.937	45.3827	0.8316	1.0155	6	0.7562
CASE-101	male	91	38.1296	33.1569	38.2474	33.1569	110.823	922.639	1.15	0.944	1.1535	8.3254	3.6485	0.0533	0.0033	0.0239	0.024	52.4043	46.583	0.587	1.0068	6	1.5695
CASE-102	male	101	37.5194	31.7058	37.638	31.7058	107.699	855.817	1.1834	0.9272	1.1871	7.9464	3.6815	0.0662	0.0033	0.0417	0.0419	50.9624	43.761	0.6442	1.0091	6	2.2356
CASE-103	male	84	36.1739	31.6196	36.5042	31.6196	106.189	844.325	1.144	0.9409	1.1545	7.9512	3.6545	0.0507	0.0031	0.0391	0.0347	48.9452	44.1669	0.5691	1.0077	6	0.8661
CASE-104	male	59	36.6677	30.9214	37.8422	30.9214	105.278	833.051	1.1858	0.9445	1.2238	7.9129	3.6476	0.0701	0.0021	0.0395	0.0297	50.8694	43.1828	0.6301	1.0098	4	3.1463
CASE-105	male	106	37.7574	34.693	37.7665	34.693	111.579	942.241	1.0883	0.9511	1.0886	8.4446	3.635	0.0444	0.0033	0.0378	0.0458	51.5823	48.252	0.6646	1.0086	5	2.3626
CASE-106	male	82	32.8475	27.1045	32.8476	27.1045	92.4196	608.956	1.2119	0.8959	1.2119	6.589	3.7452	0.0968	0.0033	0.0728	0.0769	45.2817	36.8573	0.861	1.0229	5	2.1077
CASE-107	male	88	35.3012	27.6683	35.5419	27.6683	97.3476	681.617	1.2759	0.9039	1.2846	7.0019	3.7287	0.1078	0.0034	0.0581	0.0693	49.681	38.304	0.7335	1.0149	4	3.2217
CASE-108	male	78	33.627	27.2479	34.0563	27.2479	96.8833	645.611	1.2341	0.8643	1.2499	6.6638	3.813	0.097	0.0037	0.0713	0.0839	46.6143	37.3339	0.818	1.0179	6	1.2443
CASE-109	male	69	40.1024	34.3342	40.7156	34.3342	120.162	990.405	1.168	0.862	1.1859	8.2422	3.8182	0.0814	0.0054	0.0762	0.1173	53.5229	46.6779	1.275	1.032	6	1.5825
CASE-110	male	165	37.4307	31.4279	37.5439	31.4279	115.002	776.224	1.191	0.7375	1.1946	6.7496	4.1277	0.0896	0.0129	0.04	0.0366	49.6228	41.1868	0.959	1.0227	5	1.8445
CASE-111	male	126	36.7903	28.5001	36.7923	28.5001	101.835	737.916	1.2909	0.8942	1.291	7.2462	3.7488	0.0908	0.0062	0.0269	0.0343	48.641	38.5999	0.5737	1.0087	4	3.362
CASE-112	male	121	34.4566	32.5859	35.5498	32.5859	105.196	772.83	1.0574	0.8776	1.091	7.3466	3.7841	0.0894	0.0045	0.0762	0.1092	49.4481	40.5413	0.9646	1.0222	5	1.697
CASE-113	male	129	39.553	31.0522	39.5626	31.0522	110.451	857.824	1.2738	0.8836	1.2741	7.7666	3.7711	0.11	0.0066	0.0448	0.0506	54.503	40.9462	0.7238	1.0136	6	1.2444
CASE-114	male	110	40.3449	35.5256	40.4693	35.5256	117.256	986.857	1.1357	0.902	1.1392	8.4163	3.7326	0.0577	0.0057	0.033	0.0265	53.9046	47.9404	0.7108	1.0098	5	2.0941
CASE-115	male	137	50.7083	43.928	50.7128	43.928	148.312	1557.85	1.1544	0.89	1.1545	10.5039	3.7576	0.0718	0.0061	0.0599	0.0508	51.255	44.7453	1.1655	1.0164	6	1.5697
CASE-116	male	117	29.6474	26.7436	30.4153	26.7436	87.5347	541.634	1.1086	0.8883	1.1373	6.1877	3.7612	0.0907	0.0046	0.0799	0.0895	44.1689	37.6312	0.9298	1.03	5	1.3077
CASE-117	male	141	36.1429	29.9877	36.2205	29.9877	104.749	787.418	1.2053	0.9018	1.2078	7.5172	3.7329	0.0683	0.0061	0.039	0.0307	49.9384	42.354	0.6144	1.0092	6	1.9419
CASE-118	male	164	38.9449	33.0597	39.1334	33.0597	113.76	874.622	1.178	0.8493	1.1837	7.6883	3.8466	0.074	0.0063	0.0578	0.0724	50.8426	45.7342	1.1148	1.0301	6	0.9771
CASE-119	male	131	35.5815	31.777	35.6101	31.777	105.905	783.759	1.1197	0.8781	1.1206	7.4006	3.7829	0.0712	0.005	0.0559	0.0621	48.459	43.4686	0.9476	1.0212	4	2.5891
CASE-120	male	142	35.4813	32.8651	35.5133	32.8651	105.706	811.542	1.0796	0.9127	1.0806	7.6774	3.7106	0.0549	0.0046	0.0629	0.0546	47.4978	44.9143	0.822	1.0154	6	1.1841
CASE-121	male	113	41.871	33.7098	41.882	33.7098	116.905	926.856	1.2421	0.8522	1.2424	7.9283	3.8399	0.1047	0.0053	0.0878	0.0833	54.6811	44.3139	1.2065	1.0319	6	1.1516
CASE-122	male	187	38.3125	31.3056	38.3789	31.3056	108.545	805.85	1.2238	0.8595	1.2259	7.4241	3.8237	0.0917	0.007	0.058	0.078	46.3549	38.0342	1.0258	1.0213	6	1.6187
CASE-123	male	168	35.3933	31.6516	36.5193	31.6516	106.078	819.749	1.1182	0.9155	1.1538	7.7278	3.705	0.0575	0.0065	0.0363	0.0326	49.737	43.9411	0.6019	1.0078	5	2.6399
CASE-124	male	158	35.3464	32.7769	35.4087	32.7769	108.475	806.287	1.0784	0.8611	1.0803	7.4329	3.8202	0.0491	0.0078	0.0377	0.048	47.2382	45.2641	0.7599	1.0125	6	1.4232
CASE-125	male	144	37.3717	31.4514	37.372	31.4514	109.822	866.069	1.1882	0.9024	1.1882	7.8861	3.7317	0.0692	0.0065	0.0596	0.0553	51.2966	44.0269	0.696	1.0111	6	1.4007
CASE-126	male	160	37.1225	29.986	37.1937	29.986	106.4	802.202	1.238	0.8905	1.2404	7.5395	3.7566	0.0734	0.0074	0.0329	0.0244	50.7374	42.28	0.5666	1.0061	4	3.6434
CASE-127	male	173	35.793	30.7604	35.9726	30.7604	104.704	794.268	1.1636	0.9104	1.1694	7.5858	3.7152	0.0736	0.0062	0.0503	0.0558	49.7115	42.1458	0.6748	1.0115	6	1.3608
CASE-128	male	170	33.4696	33.1601	34.1625	33.1601	103.498	783.358	1.0093	0.919	1.0302	7.5688	3.6979	0.0514	0.0053	0.0514	0.0471	46.9381	44.8973	0.7751	1.0161	6	1.504
CASE-129	male	162	37.7517	28.9574	37.8475	28.9574	104.914	804.717	1.3037	0.9187	1.307	7.6703	3.6984	0.1024	0.005	0.0255	0.024	52.9068	40.225	0.4841	1.0047	7	1.7404
CASE-130	male	132	37.2112	31.943	37.6563	31.943	108.846	851.636	1.1649	0.9033	1.1789	7.8242	3.7298	0.0743	0.0055	0.0585	0.0538	50.3902	45.5818	1.3753	1.0446	6	1.1704
CASE-131	male	147	36.2905	31.5101	36.2906	31.5101	105.552	790.223	1.1517	0.8913	1.1517	7.4866	3.7548	0.0651	0.0069	0.0349	0.0361	48.3169	42.4527	0.7548	1.0138	5	2.0673
CASE-132	male	120	33.5535	31.6784	33.6135	31.6784	102.53	748.15	1.0592	0.8943	1.0611	7.2969	3.7485	0.0475	0.006	0.0469	0.0649	44.3991	44.0213	0.7419	1.013	6	1.2749
CASE-133	male	149	35.3925	27.7961	35.5118	27.7961	99.3505	713.212	1.2733	0.908	1.2776	7.1787	3.7202	0.0892	0.0056	0.0376	0.0429	53.7146	42.6962	0.5648	1.0078	6	2.126
CASE-134	male	178	45.0016	35.3345	45.1498	35.3345	127.286	1165.86	1.2736	0.9043	1.2778	9.1593	3.7278	0.0943	0.0054	0.0563	0.0601	62.514	49.2427	0.7813	1.0091	7	1.6698
CASE-135	male	134	36.5356	33.5044	37.4978	33.5044	148.052	1010.56	1.0905	0.5794	1.1192	6.8257	4.6573	0.207	0.1903	0.2061	0.1846	51.0493	46.7041	3.2332	0.8918	5	3.3862
CASE-136	male	125	38.3869	32.5622	38.5901	32.5622	111.753	931.977	1.1789	0.9378	1.1851	8.3396	3.6606	0.0597	0.0044	0.0296	0.0349	53.8491	46.4957	0.5169	1.0047	6	2.2316
CASE-137	male	153	33.2699	29.6798	33.4971	29.6798	100.094	746.9	1.121	0.9368	1.1286	7.462	3.6625	0.0501	0.0042	0.0292	0.0234	46.5035	41.4463	0.4518	1.0047	6	2.0032
CASE-138	male	117	33.1803	28.6984	33.4541	28.6984	97.7313	724.706	1.1562	0.9535	1.1657	7.4153	3.6304	0.0521	0.0039	0.0332	0.0247	47.1195	41.605	0.4293	1.0048	6	2.0842
CASE-139	male	163	45.7748	32.8231	45.7797	32.8231	153.419	934.667	1.3946	0.499	1.3947	6.0923	5.0182	0.1861	0.1523	0.1963	0.1614	56.1016	45.9685	3.4747	1.0373	5	3.5955
CASE-140	male	117	32.88	28.4637	33.0988	28.4637	94.8834	671.047	1.1552	0.9367	1.1628	7.0723	3.6628	0.0591	0.0045	0.0346	0.0408	45.0396	38.9967	0.4314	1.0056	6	2.1397
CASE-141	male	151	51.7224	45.2267	52.2447	45.2267	154.936	1745.73	1.1436	0.9139	1.1552	11.2675	3.7082	0.0615	0.0048	0.0659	0.0745	52.9277	47.2947	1.0967	1.0141	7	1.1962
CASE-142	male	147	31.913	25.9228	32.0659	25.9228	92.6799	587.909	1.2311	0.8601	1.237	6.3434	3.8223	0.108	0.0047	0.0617	0.0744	47.3854	37.246	0.8224	1.0158	4	2.5678
CASE-143	male	130	39.1076	36.7139	39.4358	36.7139	118.597	1036.52	1.0652	0.9261	1.0741	8.7398	3.6837	0.0464	0.0051	0.0456	0.0544	54.6458	51.0548	0.7216	1.0096	5	2.3204
CASE-144	male	131	38.0041	31.7876	38.02	31.7876	107.524	865.802	1.1956	0.9411	1.1961	8.0522	3.6542	0.0709	0.0039	0.0527	0.0514	50.6171	42.8957	0.6763	1.0096	5	2.9957
CASE-145	male	113	41.3077	33.5189	41.833	33.5189	115.654	973.43	1.2324	0.9145	1.248	8.4167	3.7069	0.0888	0.0036	0.0297	0.0353	55.0992	43.9827	0.6422	1.0082	6	2.1405
CASE-146	male	97	38.5223	36.1397	38.8357	36.1397	117.079	1016.01	1.0659	0.9314	1.0746	8.678	3.6731	0.0474	0.0043	0.0368	0.0417	54.2131	49.3552	0.6249	1.0064	6	2.3138
CASE-147	male	138	35.7566	28.7636	35.9133	28.7636	102.452	764.936	1.2431	0.9158	1.2486	7.4663	3.7043	0.0764	0.0055	0.0298	0.0304	50.1638	41.423	0.5685	1.0067	7	1.1377
CASE-148	male	148	33.3501	31.2613	34.6189	31.2613	104.082	781.817	1.0668	0.9069	1.1074	7.5115	3.7224	0.0647	0.0056	0.0797	0.0679	49.0596	45.0481	0.8937	1.0212	6	1.1135
CASE-149	male	129	42.9607	34.8682	42.9768	34.8682	121.558	1055.07	1.2321	0.8973	1.2326	8.6796	3.7423	0.0772	0.0052	0.0439	0.0495	51.5317	43.0839	0.7845	1.013	6	1.3794
CASE-150	male	132	30.3012	26.1102	30.3311	26.1102	90.1041	580.024	1.1605	0.8978	1.1617	6.4373	3.7413	0.0578	0.0049	0.0594	0.0446	41.2659	37.3941	0.6531	1.0129	6	1.1082
CASE-151	male	104	33.8403	30.6742	34.7495	30.6742	101.541	786.628	1.1032	0.9587	1.1329	7.7469	3.6204	0.0419	0.0036	0.0238	0.0211	47.7576	43.4074	0.3922	1.004	4	3.1151
CASE-152	male	128	42.4694	34.1275	43.1058	34.1275	123.112	1043.45	1.2444	0.8651	1.2631	8.4756	3.8112	0.1035	0.0048	0.0614	0.0679	58.4877	45.2551	0.9169	1.0143	6	1.0312
CASE-153	male	156	37.9676	34.1105	38.0024	34.1105	113.783	947.014	1.1131	0.9192	1.1141	8.323	3.6974	0.0493	0.0058	0.0403	0.0342	51.9643	47.6655	0.6682	1.0079	6	1.4462
CASE-154	male	147	40.793	37.5147	41.0857	37.5147	123.232	1116.36	1.0874	0.9238	1.0952	9.059	3.6883	0.0539	0.0041	0.0506	0.041	53.6766	48.7514	0.7759	1.0104	6	1.9029
CASE-155	male	152	34.4656	30.8346	34.6124	30.8346	104.337	780.354	1.1178	0.9008	1.1225	7.4791	3.735	0.0517	0.005	0.0269	0.025	45.1513	40.3402	0.5435	1.0066	6	1.8353
CASE-156	male	110	35.646	29.4567	35.6649	29.4567	100.982	732.392	1.2101	0.9025	1.2108	7.2527	3.7314	0.0823	0.0042	0.0354	0.0455	47.9847	39.5996	0.7441	1.0129	4	3.079
CASE-157	male	115	31.2623	26.4926	31.5786	26.4926	91.3102	590.272	1.18	0.8897	1.192	6.4645	3.7583	0.0831	0.0055	0.0361	0.0352	44.6165	36.5763	0.5723	1.0101	6	1.355
CASE-158	male	110	43.0294	30.7908	43.0304	30.7908	117.68	889.064	1.3975	0.8067	1.3975	7.5549	3.9467	0.1502	0.0067	0.0731	0.0931	55.7092	38.0568	1.1053	1.0243	6	1.5266
CASE-159	male	102	37.64	29.1176	39.5093	29.1176	108.59	816.144	1.2927	0.8698	1.3569	7.5159	3.8011	0.1251	0.0038	0.0477	0.0506	53.1119	38.1098	0.6989	1.0117	6	1.4635
CASE-160	male	111	36.316	30.1474	36.3195	30.1474	104.759	809.157	1.2046	0.9265	1.2047	7.724	3.6828	0.0576	0.0033	0.0399	0.0445	49.8572	43.905	0.5922	1.0094	6	1.7557
CASE-161	male	119	31.6178	27.1383	33.1588	27.1383	93.0651	633.227	1.1651	0.9187	1.2218	6.8041	3.6983	0.0914	0.0043	0.0512	0.0429	45.5709	36.121	0.5659	1.0094	8	0.8529
CASE-162	male	145	38.9516	32.1982	39.1445	32.1982	112.319	898.642	1.2097	0.8951	1.2157	8.0008	3.7468	0.0758	0.0056	0.054	0.0645	52.2877	44.2905	0.789	1.0127	6	1.5014
CASE-163	male	156	33.8135	28.1751	33.844	28.1751	96.6359	701.695	1.2001	0.9442	1.2012	7.2612	3.6481	0.0658	0.0048	0.0437	0.0384	47.5058	40.3706	0.4951	1.0066	6	2.5647
CASE-164	male	108	38.11	34.7269	40.3365	34.7269	116.283	944.308	1.0974	0.8776	1.1615	8.1208	3.7841	0.0993	0.0048	0.1114	0.1101	53.6705	44.7252	1.267	1.0309	5	2.3707
CASE-165	male	109	31.9249	28.8376	32.5536	28.8376	94.9035	659.447	1.1071	0.9201	1.1289	6.9486	3.6957	0.0655	0.0042	0.0483	0.0507	45.4513	39.3506	0.6029	1.0103	6	1.0545
CASE-166	male	93	33.4705	31.0125	34.7587	31.0125	102.793	783.684	1.0793	0.932	1.1208	7.6239	3.6719	0.0493	0.0041	0.0372	0.04	45.3905	40.5965	0.4449	1.005	6	1.8704
CASE-167	male	109	37.9699	32.8007	38.1375	32.8007	112.745	920.443	1.1576	0.9099	1.1627	8.1639	3.7162	0.0699	0.0056	0.0676	0.0569	52.642	45.5808	0.802	1.0142	6	1.5258
CASE-168	male	116	34.3818	32.2492	34.3972	32.2492	104.082	796.781	1.0661	0.9243	1.0666	7.6553	3.6873	0.0362	0.0058	0.0325	0.0316	45.8274	44.7649	0.5703	1.0082	6	1.6838
CASE-169	male	140	37.0691	32.7269	37.4709	32.7269	108.213	840.98	1.1327	0.9025	1.145	7.7715	3.7315	0.0711	0.0048	0.0501	0.0601	51.5523	45.2879	0.8929	1.0177	6	1.1123
CASE-170	male	91	39.269	32.1892	39.4695	32.1892	110.876	886.889	1.2199	0.9066	1.2262	7.9989	3.7231	0.0716	0.0031	0.0274	0.031	51.7239	43.806	0.7102	1.0119	6	0.9374
CASE-171	male	94	36.2975	29.3062	36.6961	29.3062	102.044	758.518	1.2386	0.9154	1.2522	7.4332	3.7051	0.0796	0.0044	0.0384	0.0486	49.0156	40.4494	0.6666	1.0113	5	2.726
CASE-172	male	107	37.2355	32.9454	37.2549	32.9454	113.217	890.809	1.1302	0.8733	1.1308	7.8682	3.7933	0.0599	0.0053	0.0614	0.0697	50.605	45.4704	0.7778	1.0098	6	1.8506
CASE-173	male	118	33.9716	27.9626	34.3648	27.9626	99.6348	685.54	1.2149	0.8678	1.229	6.8805	3.8053	0.0894	0.0075	0.0483	0.0414	48.1776	38.8874	0.7265	1.0158	6	1.0963
CASE-174	male	125	36.361	30.9321	36.563	30.9321	106.641	833.956	1.1755	0.9215	1.182	7.8202	3.6928	0.0719	0.0044	0.0463	0.0508	50.5521	42.5319	0.6075	1.0068	7	1.2496
CASE-175	male	114	36.146	34.5224	36.5001	34.5224	110.879	877.262	1.047	0.8967	1.0573	7.9119	3.7436	0.0543	0.0048	0.0507	0.0506	50.1971	46.1892	0.7419	1.0128	4	2.8519
CASE-176	male	107	32.1378	32.4449	32.7788	32.1378	100.431	764.822	0.9905	0.9529	1.0199	7.6154	3.6315	0.0336	0.0041	0.0315	0.029	45.8782	44.2144	0.4825	1.0055	7	1.3787
CASE-177	male	89	37.2983	32.845	37.3135	32.845	109.554	871.202	1.1356	0.9122	1.136	7.9522	3.7117	0.0754	0.0036	0.0875	0.0558	52.6525	45.9727	1.0273	1.022	6	1.2303
CASE-178	male	103	35.5897	32.9784	36.0027	32.9784	107.624	832.207	1.0792	0.9029	1.0917	7.7325	3.7307	0.0916	0.0031	0.1375	0.1547
CASE-179	male	94	34.6923	32.1988	34.9962	32.1988	104.526	812.579	1.0774	0.9346	1.0869	7.7739	3.6668	0.0573	0.0028	0.0509	0.0613
CASE-180	male	91	32.3322	26.1853	32.615	26.1853	91.6632	625.001	1.2347	0.9348	1.2455	6.8185	3.6665	0.0856	0.0031	0.0598	0.0465	46.4864	37.7972	0.625	1.012	7	1.2496
CASE-181	male	104	37.92	34.1417	38.0096	34.1417	110.344	911.19	1.1107	0.9404	1.1133	8.2578	3.6555	0.0525	0.0032	0.0351	0.0323	51.2394	46.6151	0.6902	1.0099	5	2.7207
CASE-182	male	106	37.9	32.6012	38.1664	32.6012	109.441	836.171	1.1625	0.8773	1.1707	7.6404	3.7847	0.0698	0.0056	0.0538	0.0627	49.6232	44.6552	0.9839	1.0219	6	1.4917
CASE-183	male	144	40.9312	33.176	41.1056	33.176	113.726	928.851	1.2338	0.9025	1.239	8.1675	3.7315	0.0987	0.0048	0.0326	0.0415	57.1015	44.5115	0.7396	1.0115	4	3.7876
CASE-184	male	113	37.9141	29.458	37.9703	29.458	106.328	847.397	1.2871	0.9419	1.289	7.9696	3.6526	0.0868	0.0034	0.029	0.0265	52.9208	41.9338	0.4379	1.0039	4	4.1072
CASE-185	male	101	43.4205	40.0613	43.4941	40.0613	129.62	1262.95	1.0839	0.9446	1.0857	9.7434	3.6474	0.0433	0.0031	0.0476	0.0407	46.425	44.5147	0.8261	1.0103	6	1.2865
CASE-186	male	108	28.0552	21.2141	28.0619	21.2141	76.6764	416.557	1.3225	0.8904	1.3228	5.4327	3.7569	0.1167	0.0041	0.0519	0.0485	43.6387	32.2862	0.4856	1.0113	6	1.5497
CASE-187	male	113	24.6461	21.4846	26.3114	21.4846	74.879	383.374	1.1472	0.8592	1.2247	5.1199	3.8243	0.0707	0.0052	0.0327	0.0378	52.3287	46.477	0.6601	1.01	6	1.0412
CASE-188	male	131	35.9451	31.4506	37.0213	31.4506	104.931	800.251	1.1429	0.9133	1.1771	7.6264	3.7093	0.0819	0.0048	0.0723	0.0609	53.2889	44.0839	0.7714	1.0148	5	2.5292
CASE-189	male	114	38.4866	33.3624	38.574	33.3624	112.499	933.527	1.1536	0.9269	1.1562	8.2981	3.682	0.0568	0.0039	0.049	0.0336
CASE-190	male	88	32.9491	31.1739	35.1904	31.1739	103.24	718.453	1.0569	0.8471	1.1288	6.9591	3.8516	0.0956	0.0038	0.0964	0.0589	48.4051	40.5118	1.1496	1.0386	6	1.0657
CASE-191	male	79	37.7781	32.2292	38.1909	32.2292	113.493	935.508	1.1722	0.9127	1.185	8.2429	3.7106	0.0686	0.0051	0.0326	0.0366	54.3017	45.1784	0.4329	1.0041	6	2.4668
CASE-192	male	104	34.2428	29.7383	34.2994	29.7383	99.0488	717.96	1.1515	0.9196	1.1534	7.2485	3.6966	0.0721	0.0037	0.0502	0.0487	47.1318	40.2405	0.7436	1.015	5	1.9602
CASE-193	male	90	32.9556	30.1593	33.0693	30.1593	102.058	675.55	1.0927	0.815	1.0965	6.6193	3.9266	0.0592	0.0087	0.0326	0.0332	45.5607	41.2136	0.685	1.0139	4	2.3615
CASE-194	male	80	36.7316	31.6468	36.7994	31.6468	105.438	821.147	1.1607	0.9282	1.1628	7.788	3.6795	0.0645	0.003	0.0474	0.0454	50.1232	44.1714	0.7459	1.0132	6	1.5016
CASE-195	male	81	41.4438	36.6151	41.4559	36.6151	121.709	1046.71	1.1319	0.888	1.1322	8.6001	3.7619	0.0724	0.0027	0.0669	0.0789	47.2524	42.0974	1.0757	1.0218	6	1.1138
CASE-196	male	98	35.0933	28.4904	35.2992	28.4904	96.717	689.049	1.2318	0.9257	1.239	7.1244	3.6845	0.0817	0.0034	0.0264	0.0238	47.1903	38.7207	0.5939	1.0099	4	2.5707
CASE-197	male	88	34.823	25.8044	34.8911	25.8044	95.0015	608.972	1.3495	0.8479	1.3521	6.4101	3.8497	0.1415	0.0031	0.0817	0.0748	46.0404	32.9932	1.0692	1.03	5	2.037
CASE-198	male	113	36.1019	30.6074	36.4342	30.6074	160.033	669.839	1.1795	0.3287	1.1904	4.1856	6.1834	0.2208	0.2881	0.2578	0.1989	45.0024	42.1454	3.3405	1.0769	4	3.4907
CASE-199	male	119	38.4767	30.81	38.5551	30.81	106.85	836.179	1.2488	0.9204	1.2514	7.8258	3.6951	0.0921	0.004	0.0376	0.0414	54.7613	43.367	0.6686	1.0105	6	1.585
CASE-200	male	149	43.3934	37.0634	43.4646	37.0634	130.42	1135.69	1.1708	0.839	1.1727	8.708	3.87	0.0539	0.0098	0.0399	0.034	58.3795	52.1516	0.6765	1.0126	6	1.77
CASE-201	male	116	36.5199	31.103	36.6393	31.103	107.014	831.05	1.1742	0.9119	1.178	7.7658	3.7122	0.0747	0.004	0.0408	0.0364	51.4276	43.0949	0.6688	1.0092	6	1.6724
CASE-202	male	135	33.5712	28.5846	33.8408	28.5846	96.7654	657.431	1.1744	0.8823	1.1839	6.7941	3.7739	0.0782	0.004	0.0471	0.0362	50.8883	44.6333	0.9741	1.0233	4	2.6118
CASE-203	male	142	33.4632	30.1628	34.0489	30.1628	100.649	743.366	1.1094	0.9221	1.1288	7.3857	3.6916	0.0535	0.0042	0.044	0.062	46.55	42.7418	0.6847	1.0136	6	1.4015
CASE-204	male	90	40.7565	36.9161	40.9649	36.9161	119.441	1087.51	1.104	0.9579	1.1097	9.105	3.6219	0.0471	0.0022	0.0324	0.0419	56.5137	51.0992	0.5743	1.0061	6	1.6654
CASE-205	male	108	34.7275	26.8455	36.2113	26.8455	102.213	670.202	1.2936	0.8061	1.3489	6.5569	3.9483	0.1532	0.0028	0.101	0.0972	51.1191	36.0518	1.2019	1.0311	4	2.7842
CASE-206	male	119	35.2792	31.0552	35.3749	31.0552	102.647	744.111	1.136	0.8875	1.1391	7.2492	3.7629	0.0702	0.0056	0.0406	0.0336	47.6459	41.7919	0.7996	1.0153	4	2.4682
CASE-207	male	102	39.1157	32.0083	39.174	32.0083	108.578	830.552	1.222	0.8853	1.2239	7.6493	3.7676	0.0979	0.003	0.0602	0.0376	52.6192	42.6985	1.1252	1.0257	6	1.3199
CASE-208	male	102	45.1105	37.0061	45.5398	37.0061	130.735	1223.91	1.219	0.8999	1.2306	9.3618	3.737	0.0857	0.0035	0.0638	0.0635	62.5912	51.8463	1.0277	1.0131	6	2.5394
CASE-209	male	80	38.0896	36.198	38.1273	36.198	117.043	982.265	1.0523	0.901	1.0533	8.3923	3.7345	0.0702	0.0028	0.0966	0.0985	54.8605	51.3691	1.1674	1.0287	6	0.9934
CASE-210	male	112	35.7253	30.8032	36.5381	30.8032	102.958	740.735	1.1598	0.8781	1.1862	7.1945	3.7829	0.0968	0.0048	0.0865	0.0692	49.9352	40.7791	1.0067	1.0288	4	2.5578
CASE-211	male	59	36.2703	32.5301	36.5475	32.5301	120.717	871.756	1.115	0.7517	1.1235	7.2215	4.0886	0.0701	0.0502	0.0707	0.0458	45.083	41.7135	1.0026	0.9849	6	1.2998
CASE-212	male	68	33.8971	25.3663	33.9291	25.3663	91.5466	620.389	1.3363	0.9302	1.3376	6.7768	3.6754	0.1068	0.0022	0.0239	0.0205	45.526	34.1949	0.4504	1.0057	7	1.6063
CASE-213	male	69	29.4123	25.9279	31.0382	25.9279	88.4738	566.673	1.1344	0.9097	1.1971	6.405	3.7166	0.075	0.0026	0.0441	0.0536	43.5332	38.2193	0.7667	1.0188	4	1.8853
CASE-214	male	62	38.9906	37.2535	39.0277	37.2535	118.016	1060.74	1.0466	0.9571	1.0476	8.9881	3.6236	0.0481	0.0018	0.048	0.029	49.3495	47.672	0.5825	1.0083	5	1.8149
CASE-215	male	67	37.207	33.9601	37.8115	33.9601	112.139	962.968	1.0956	0.9623	1.1134	8.5873	3.6137	0.0496	0.002	0.0382	0.0372	53.8735	48.4854	0.592	1.0073	6	1.5798
CASE-216	male	87	40.6976	34.8766	40.7824	34.8766	116.29	1023.18	1.1669	0.9508	1.1693	8.7986	3.6355	0.0589	0.0025	0.0193	0.0182	53.0951	46.3519	0.6271	1.0068	6	1.6507
CASE-217	male	60	36.2545	28.5538	37.0605	28.5538	100.407	748.776	1.2697	0.9333	1.2979	7.4574	3.6693	0.0873	0.0017	0.051	0.0505	49.6895	40.1786	0.6696	1.0115	7	1.5332
CASE-218	male	76	33.6028	32.6753	34.5204	32.6753	103.99	755.224	1.0284	0.8776	1.0565	7.2625	3.784	0.0784	0.003	0.0854	0.0786	46.1724	44.1181	1.2299	1.0385	6	1.2346
CASE-219	male	64	35.8713	29.1658	35.8846	29.1658	100.785	756.654	1.2299	0.9361	1.2304	7.5076	3.6639	0.0852	0.0019	0.0571	0.052	49.291	39.937	0.6084	1.0093	6	1.45
CASE-220	male	84	36.8924	32.275	36.9539	32.275	109.141	857.021	1.1431	0.9041	1.145	7.8524	3.7282	0.0841	0.0029	0.0748	0.0837	50.8278	43.2194	0.9663	1.0155	5	2.8738
CASE-221	male	73	38.0549	32.1815	39.1592	32.1815	109.611	897.03	1.1825	0.9382	1.2168	8.1838	3.6597	0.0801	0.0026	0.039	0.0296	54.3426	44.7704	0.6705	1.0094	6	2.4412
CASE-222	male	79	38.7511	32.8254	38.7831	32.8254	107.614	861.976	1.1805	0.9353	1.1815	8.0099	3.6654	0.074	0.002	0.0563	0.0692	50.4379	43.4266	0.8532	1.0166	6	1.2502
CASE-223	male	75	33.1584	30.2244	33.2036	30.2244	96.8365	713.049	1.0971	0.9555	1.0986	7.3634	3.6264	0.0431	0.0025	0.03	0.0266	44.9935	41.499	0.5	1.0072	5	2.2495
CASE-224	male	65	33.7706	27.9884	34.2265	27.9884	99.1832	740.523	1.2066	0.946	1.2229	7.4662	3.6448	0.0768	0.0021	0.0337	0.0465	50.085	40.7146	0.411	1.0045	5	2.6204
CASE-225	male	83	38.4006	31.0275	38.5977	31.0275	106.657	832.458	1.2376	0.9196	1.244	7.805	3.6967	0.0989	0.0027	0.0648	0.0707	53.3476	42.1078	0.7783	1.0143	6	1.3531
CASE-226	male	76	34.3088	33.7998	36.0218	33.7998	108.242	882.39	1.0151	0.9464	1.0657	8.152	3.6439	0.0362	0.0024	0.0454	0.0412
CASE-227	male	70	30.7749	22.1455	30.7752	22.1455	82.5696	486.584	1.3897	0.8969	1.3897	5.893	3.7432	0.139	0.0025	0.0492	0.0691	44.1356	30.5181	0.5942	1.0142	7	1.1236
CASE-228	male	71	32.9353	32.1253	33.0042	32.1253	116.087	716.087	1.0252	0.6677	1.0274	6.1686	4.3381	0.1189	0.0535	0.1051	0.1342	47.3304	41.5596	1.3967	1.0028	4	2.5475
CASE-229	male	79	35.0258	30.4522	35.2016	30.4522	100.403	739.432	1.1502	0.9218	1.156	7.3647	3.6923	0.0939	0.0024	0.0935	0.0827	46.2986	39.0923	1.0601	1.0284	6	1.2558
CASE-230	male	92	34.3605	29.7882	34.7568	29.7882	99.3213	735.832	1.1535	0.9374	1.1668	7.4086	3.6614	0.0735	0.0031	0.081	0.0748	50.2583	43.7244	0.8125	1.0171	6	1.2631
CASE-231	male	79	40.555	31.9589	40.7767	31.9589	112.77	900.827	1.269	0.8902	1.2759	7.9882	3.7573	0.1229	0.0024	0.1056	0.0985	56.5358	42.4312	1.1346	1.0275	5	2.2506
CASE-232	male	79	35.1062	30.7508	36.261	30.7508	103.643	799.765	1.1416	0.9356	1.1792	7.7165	3.6649	0.0632	0.0028	0.0364	0.0354	50.054	42.9495	0.5006	1.0068	7	1.251
CASE-233	male	93	35.527	32.768	35.9815	32.768	107.866	875.769	1.0842	0.9459	1.0981	8.119	3.6449	0.0411	0.0036	0.0402	0.0403	49.3266	45.7295	0.5328	1.0059	7	1.1811
CASE-234	male	79	28.8365	24.7156	29.0397	24.7156	123.435	453.109	1.1667	0.3737	1.175	3.6708	5.7988	0.2479	0.3219	0.2795	0.2246	42.0322	35.5045	3.1472	1.1686	5	2.6961
CASE-235	female	89	29.2287	23.4287	29.58	23.4287	82.4426	481.697	1.2476	0.8906	1.2626	5.8428	3.7563	0.1134	0.0039	0.1089	0.101	40.9559	31.8477	0.8614	1.03	6	1.1999
CASE-236	female	93	32.1852	27.5633	32.3535	27.5633	91.4052	609.666	1.1677	0.917	1.1738	6.6699	3.7019	0.0731	0.0038	0.0435	0.0583	43.4883	37.3469	0.692	1.0147	4	2.311
CASE-237	female	82	30.5588	25.5417	30.9935	25.5417	88.8318	591.347	1.1964	0.9417	1.2135	6.6569	3.653	0.0738	0.0032	0.0456	0.0533	43.3694	36.0122	0.4309	1.006	7	1.2021
CASE-238	female	104	33.6897	26.4956	33.699	26.4956	92.9719	618.403	1.2715	0.899	1.2719	6.6515	3.7387	0.112	0.0041	0.0763	0.0719	47.468	36.5147	0.8526	1.0217	4	2.6033
CASE-239	female	126	30.4228	27.1065	30.4495	27.1065	91.3971	612.692	1.1223	0.9217	1.1233	6.7036	3.6924	0.0646	0.0051	0.0774	0.0761	47.8769	42.5109	0.6758	1.0134	6	1.5095
CASE-240	female	86	32.2554	28.0834	32.4732	28.0834	92.6999	631.962	1.1486	0.9242	1.1563	6.8173	3.6875	0.0656	0.0036	0.0449	0.0431	42.9274	37.3303	0.6216	1.0107	4	2.4221
CASE-241	female	85	33.9767	27.6805	33.984	27.6805	95.9917	668.904	1.2275	0.9122	1.2277	6.9684	3.7115	0.0953	0.0039	0.0751	0.0762	48.7393	39.0803	0.7557	1.0157	6	1.6489
CASE-242	female	91	30.6541	25.9966	30.6558	25.9966	87.7965	561.596	1.1792	0.9155	1.1792	6.3966	3.7048	0.0935	0.0031	0.1082	0.098	43.1685	36.3511	0.9148	1.0274	6	1.2329
CASE-243	female	74	29.655	20.4466	29.6558	20.4466	81.5207	476.12	1.4504	0.9003	1.4504	5.8405	3.736	0.1461	0.0028	0.0543	0.0436	44.9983	30.1584	0.5787	1.0143	7	0.9039
CASE-244	female	105	35.4742	28.6276	35.4771	28.6276	98.4445	717.198	1.2392	0.93	1.2393	7.2853	3.676	0.0869	0.0038	0.0456	0.0451	48.2161	39.0857	0.6564	1.0116	4	2.8076
CASE-245	female	103	35.6418	29.9401	35.6696	29.9401	100.704	752.008	1.1904	0.9318	1.1914	7.4675	3.6723	0.0695	0.0039	0.0242	0.0294	48.5099	41.7085	0.6827	1.0113	6	1.5148
CASE-246	female	101	26.376	24.7516	26.6772	24.7516	81.1713	491.522	1.0656	0.9374	1.0778	6.0554	3.6613	0.0655	0.0034	0.0927	0.1	38.3717	34.9894	0.7063	1.0187	8	0.8174
CASE-247	female	96	27.7919	22.1825	28.6125	22.1825	83.0489	498.716	1.2529	0.9086	1.2899	6.0051	3.7188	0.1151	0.0025	0.0749	0.0728	44.4599	33.6511	0.759	1.0228	6	0.7271
CASE-248	female	111	34.4166	31.1844	34.4687	31.1844	99.1805	726.188	1.1036	0.9277	1.1053	7.3219	3.6805	0.0699	0.0041	0.044	0.0434	47.0948	41.0392	0.773	1.0163	4	2.322
CASE-249	female	117	29.479	26.8909	29.5984	26.8909	91.0598	606.967	1.0962	0.9199	1.1007	6.6656	3.6961	0.0567	0.0052	0.0562	0.0535	43.7863	39.0944	0.5393	1.0091	7	0.9754
CASE-250	female	108	35.2227	28.3562	35.4484	28.3562	99.943	740.283	1.2422	0.9313	1.2501	7.4071	3.6733	0.0874	0.0037	0.0299	0.0356	50.6404	40.2145	0.4289	1.0046	7	1.1308
CASE-251	female	98	33.8999	26.041	33.9158	26.041	94.2094	645.475	1.3018	0.9139	1.3024	6.8515	3.7081	0.1065	0.0046	0.029	0.0316	48.5032	36.3795	0.3985	1.0042	7	1.5172
CASE-252	female	109	35.0092	30.2764	35.0578	30.2764	100.057	742.904	1.1563	0.9325	1.1579	7.4248	3.671	0.0669	0.0041	0.0555	0.0746	47.8058	41.5224	0.6942	1.0121	5	2.3785
CASE-253	female	122	27.5706	29.7975	29.7984	27.5706	89.6351	587.854	0.9253	0.9194	1.0808	6.5583	3.6969	0.0449	0.0058	0.0577	0.0564	34.8926	33.2422	0.5843	1.0107	4	2.4878
CASE-254	female	115	28.1225	24.7159	30.961	24.7159	88.0233	563.237	1.1378	0.9135	1.2527	6.3987	3.709	0.0866	0.0047	0.0622	0.0446	40.0991	33.0562	0.7311	1.0186	4	1.9704
CASE-255	female	114	31.9229	28.7215	32.0289	28.7215	95.2413	668.315	1.1115	0.9258	1.1152	7.0171	3.6841	0.0564	0.0047	0.052	0.0623	36.0303	32.2841	0.5957	1.0089	6	1.1042
CASE-256	female	105	30.2958	28.2573	30.9069	28.2573	90.2835	604.465	1.0721	0.9319	1.0938	6.6952	3.6722	0.0493	0.0044	0.0284	0.027	53.6083	49.507	0.573	1.0104	4	2.3625
CASE-257	female	98	32.2536	26.0149	32.6778	26.0149	90.5681	616.59	1.2398	0.9446	1.2561	6.808	3.6473	0.0766	0.0033	0.0335	0.0348	37.6419	31.048	0.4646	1.0065	4	3.5134
CASE-258	female	118	33.9771	27.0859	34.0202	27.0859	94.8816	625.578	1.2544	0.8732	1.256	6.5932	3.7935	0.0993	0.0055	0.0454	0.0572	38.1512	29.931	0.6727	1.0151	7	0.8873
CASE-259	female	108	34.0774	25.9343	34.2709	25.9343	93.691	625.061	1.314	0.8948	1.3215	6.6715	3.7475	0.1075	0.005	0.0365	0.0496	37.5591	28.4403	0.5824	1.0102	4	2.8499
CASE-260	female	84	31.8063	28.1333	31.8947	28.1333	92.8884	636.913	1.1306	0.9276	1.1337	6.8568	3.6806	0.0649	0.0036	0.0355	0.0323	35.9786	31.3227	0.5848	1.01	6	1.181
CASE-261	female	98	34.7077	29.1015	34.7279	29.1015	98.7775	691.446	1.1926	0.8905	1.1933	7	3.7565	0.0761	0.0044	0.0522	0.0605	37.9997	32.7188	0.8046	1.0165	6	1.4163
CASE-262	female	71	31.9954	26.2854	32.2844	26.2854	90.2662	589.046	1.2172	0.9085	1.2282	6.5257	3.7192	0.0907	0.0035	0.0471	0.0527	35.7216	29.2338	0.7467	1.0165	4	2.565
CASE-263	female	79	32.8985	29.1854	33.8819	29.1854	95.8273	689.418	1.1272	0.9434	1.1609	7.1944	3.6496	0.0894	0.0023	0.0471	0.0325	39.118	30.9773	0.5193	1.0076	5	2.3903
CASE-264	female	82	33.7434	29.5471	33.9419	29.5471	96.3639	684.822	1.142	0.9267	1.1487	7.1066	3.6824	0.0825	0.003	0.0478	0.0376	38.4676	31.7408	0.6967	1.0133	6	1.0263
CASE-265	female	82	33.321	26.8705	33.4568	26.8705	92.8439	648.966	1.2401	0.9461	1.2451	6.9899	3.6445	0.0837	0.0026	0.0429	0.05	37.8199	30.6332	0.5203	1.0082	4	3.5641
CASE-266	female	78	29.5944	28.8862	33.6645	28.8862	94.5475	681.132	1.0245	0.9575	1.1654	7.2041	3.6227	0.0674	0.0026	0.0236	0.0279	37.8521	31.7478	0.3633	1.0038	7	1.8493
CASE-267	female	84	32.1583	25.5661	32.1959	25.5661	89.4706	581.721	1.2579	0.9132	1.2593	6.5018	3.7096	0.0954	0.0033	0.05	0.0495	35.6841	28.1513	0.573	1.0103	4	2.5969
CASE-268	female	73	28.115	23.9086	28.3937	23.9086	80.0208	481.094	1.1759	0.9441	1.1876	6.0121	3.6483	0.0665	0.0027	0.037	0.0382	31.7556	27.2098	0.4714	1.0081	5	1.8461
CASE-269	female	84	35.6611	29.6079	35.6642	29.6079	102.931	789.24	1.2044	0.9361	1.2045	7.6676	3.6639	0.0753	0.0031	0.0403	0.0354	40.9381	33.7547	0.5742	1.0082	6	1.5941
CASE-270	female	88	34.8674	28.1212	35.0433	28.1212	97.6925	708.355	1.2399	0.9327	1.2462	7.2509	3.6706	0.0774	0.0034	0.0342	0.0329	39.07	32.0988	0.4988	1.0068	4	3.2978
CASE-271	female	90	33.3872	30.2426	33.6397	30.2426	99.1148	725.555	1.104	0.9281	1.1123	7.3204	3.6796	0.062	0.0035	0.0618	0.0557	37.3375	33.3892	0.7421	1.0137	5	2.0467
CASE-272	female	93	36.6487	32.017	36.6487	32.017	106.232	843.611	1.1447	0.9394	1.1447	7.9412	3.6575	0.0715	0.003	0.0648	0.0611	41.4061	35.6438	0.7873	1.0144	6	1.6703
CASE-273	female	79	31.1674	26.4853	31.3432	26.4853	88.9905	595.831	1.1768	0.9455	1.1834	6.6954	3.6457	0.075	0.0033	0.0221	0.021	46.5374	38.3865	0.4043	1.0052	6	1.9571
CASE-274	female	72	33.7662	28.1974	34.144	28.1974	97.2754	705.855	1.1975	0.9374	1.2109	7.2562	3.6614	0.0786	0.0024	0.0687	0.0649	47.7988	39.9545	0.6652	1.0117	6	1.7847
CASE-275	female	92	30.623	26.6303	30.6701	26.6303	88.5333	577.197	1.1499	0.9254	1.1517	6.5195	3.6851	0.0677	0.0036	0.0498	0.0583	35.95	31.3666	0.6307	1.0122	6	1.2849
CASE-276	female	67	34.2546	32.7682	34.4422	32.7682	105.01	813.022	1.0454	0.9265	1.0511	7.7423	3.6828	0.0526	0.0033	0.0753	0.0723	37.5466	36.5196	0.8319	1.0159	6	1.1084
CASE-277	female	74	33.2363	25.8326	34.7751	25.8326	92.8746	615.941	1.2866	0.8973	1.3462	6.632	3.7422	0.1136	0.003	0.0708	0.1002	37.7891	28.7625	0.8417	1.0222	7	0.7551
CASE-278	female	83	27.4442	23.0864	27.7175	23.0864	77.9093	451.737	1.1888	0.9352	1.2006	5.7982	3.6656	0.0723	0.0031	0.042	0.02	30.8264	26.0956	0.5127	1.012	7	0.946
CASE-279	female	78	30.9853	30.639	31.9661	30.639	96.2749	700.457	1.0113	0.9497	1.0433	7.2756	3.6377	0.0468	0.0028	0.0583	0.069	46.6579	44.3638	0.6617	1.0119	5	1.7535
CASE-280	female	79	31.4404	29.6468	31.5831	29.6468	96.0072	690.751	1.0605	0.9417	1.0653	7.1948	3.6529	0.0376	0.0039	0.0298	0.0268	44.6054	41.3636	0.3886	1.0041	5	1.8158
CASE-281	female	78	35.3606	27.8208	35.3643	27.8208	97.5949	719.014	1.271	0.9486	1.2711	7.3673	3.6396	0.0921	0.0025	0.0366	0.0329	49.323	38.6453	0.4488	1.0053	6	2.106
CASE-282	female	74	30.8819	26.7458	31.6876	26.7458	91.2071	622.63	1.1546	0.9406	1.1848	6.8266	3.6552	0.0703	0.0027	0.0712	0.0663	44.5676	38.039	0.6451	1.0118	6	1.7609
CASE-283	female	70	30.8631	27.546	30.9957	27.546	90.936	621.989	1.1204	0.9452	1.1252	6.8399	3.6462	0.0698	0.0024	0.0797	0.0604	44.1365	38.4345	0.6829	1.0133	5	2.3804
CASE-284	female	76	26.0896	25.8749	26.4505	25.8749	81.7432	518.6	1.0083	0.9753	1.0222	6.3443	3.5895	0.0269	0.002	0.0416	0.0294	39.594	38.6836	0.3324	1.0042	6	1.4849
CASE-285	female	97	33.2227	30.1214	33.4049	30.1214	97.4764	706.804	1.103	0.9348	1.109	7.251	3.6665	0.0524	0.0042	0.0454	0.0511	44.9463	41.2525	0.6398	1.0109	6	1.2215
CASE-286	female	80	31.7169	27.8689	31.7225	27.8689	91.1297	628.227	1.1381	0.9506	1.1383	6.8938	3.6358	0.0666	0.0021	0.0315	0.0273	44.0259	37.7056	0.4913	1.0075	4	2.6029
CASE-287	female	76	33.4956	28.9685	33.8338	28.9685	98.7253	736.439	1.1563	0.9495	1.168	7.4595	3.638	0.0602	0.0027	0.0362	0.0508	50.1058	43.0194	0.3988	1.004	6	1.7821
CASE-288	female	77	33.2384	29.1882	33.4332	29.1882	96.0793	695.342	1.1388	0.9466	1.1454	7.2372	3.6436	0.0593	0.0032	0.0203	0.0171	46.3468	40.5126	0.5192	1.0073	5	2.4316
CASE-289	female	88	36.5684	32.6229	37.3452	32.6229	108.229	882.782	1.1209	0.9471	1.1448	8.1566	3.6427	0.0568	0.0029	0.0396	0.0385	49.4587	44.5225	0.7474	1.0116	6	1.4626
CASE-290	female	82	29.1274	29.2191	29.5319	29.1274	90.2934	594.165	0.9969	0.9158	1.0139	6.5804	3.7043	0.0478	0.0037	0.0535	0.0688	40.5928	38.1219	0.6038	1.0107	5	1.177
CASE-291	female	97	37.204	32.7065	37.2709	32.7065	108.384	873.324	1.1375	0.9342	1.1396	8.0577	3.6676	0.071	0.0033	0.0596	0.0608	52.3107	44.7294	0.7553	1.0115	7	1.2567
CASE-292	female	77	32.853	28.1221	33.191	28.1221	93.8192	662.936	1.1682	0.9465	1.1802	7.0661	3.6438	0.0618	0.0023	0.0216	0.0205	44.8534	38.7953	0.5201	1.0076	6	1.4155
CASE-293	female	77	34.8615	26.7857	34.9138	26.7857	94.8731	661.226	1.3015	0.9232	1.3035	6.9696	3.6895	0.1104	0.0028	0.0514	0.0441	48.7091	36.5927	0.6426	1.0118	7	1.6588
CASE-294	female	79	33.0625	29.0897	33.7997	29.0897	95.9136	647.591	1.1366	0.8846	1.1619	6.7518	3.769	0.0914	0.0035	0.0837	0.1029	45.9019	38.7339	0.992	1.0304	5	1.3275
CASE-295	female	86	34.5338	28.7896	34.6679	28.7896	99.8184	726.298	1.1995	0.916	1.2042	7.2762	3.7038	0.0921	0.0032	0.0284	0.0365	50.3805	39.5138	0.6495	1.0113	4	2.551
CASE-296	female	71	33.8683	32.4231	33.8684	32.4231	102.26	771.963	1.0446	0.9277	1.0446	7.549	3.6805	0.0643	0.0027	0.0964	0.0845	45.4812	43.0038	0.9614	1.0222	5	1.9436
CASE-297	female	65	26.4918	22.9792	26.5401	22.9792	74.7155	411.395	1.1529	0.9261	1.155	5.5062	3.6837	0.0725	0.0027	0.0476	0.0503	42.1918	36.1758	0.5341	1.0135	5	1.7547
CASE-298	female	62	33.7075	26.8915	33.7973	26.8915	92.0109	620.248	1.2535	0.9207	1.2568	6.741	3.6945	0.1015	0.0025	0.0548	0.0543	47.2945	37.1954	0.7075	1.0156	4	2.3684
CASE-299	female	71	32.6448	27.4001	33.0001	27.4001	93.8278	645.357	1.1914	0.9212	1.2044	6.8781	3.6934	0.0742	0.0035	0.038	0.0273	45.7893	38.1135	0.4944	1.0082	4	2.8976
CASE-300	female	73	33.1737	29.7265	33.1905	29.7265	97.6713	719.232	1.116	0.9474	1.1165	7.3638	3.6419	0.0354	0.0037	0.0283	0.0377	46.1296	42.7038	0.3647	1.0034	6	1.9897
CASE-301	female	68	37.6277	29.7315	37.8233	29.7315	104.738	825.848	1.2656	0.946	1.2722	7.8849	3.6446	0.0937	0.0028	0.0218	0.0206	52.5008	40.7065	0.3816	1.0033	8	1.0531
CASE-302	female	71	33.6348	28.7177	34.1113	28.7177	97.9704	676.383	1.1712	0.8855	1.1878	6.904	3.767	0.0848	0.0037	0.0624	0.0648	46.2235	38.9718	0.854	1.0184	4	2.4431
CASE-303	female	78	34.5535	32.8559	34.6955	32.8559	104.019	817.486	1.0517	0.9494	1.056	7.859	3.6381	0.058	0.0028	0.0788	0.0895	47.2704	44.002	0.8538	1.0163	6	2.0807
CASE-304	female	81	33.18	31.5853	33.2304	31.5853	99.1809	757.165	1.0505	0.9673	1.0521	7.6342	3.6044	0.0328	0.0026	0.0227	0.0285	45.7246	43.5733	0.4428	1.005	5	1.9915
CASE-305	female	76	31.4707	23.2272	31.5112	23.2272	84.1983	511.67	1.3549	0.907	1.3567	6.077	3.7223	0.1237	0.0029	0.0482	0.0509	43.4502	31.6321	0.5685	1.0116	6	1.9629
CASE-306	female	82	31.3247	30.0038	31.4514	30.0038	94.7469	659.246	1.044	0.9228	1.0482	6.958	3.6901	0.0557	0.0041	0.0489	0.0561	43.5258	39.8792	0.6806	1.0131	5	1.5369
CASE-307	female	89	35.3701	36.0141	36.1449	35.3701	113.856	948.546	0.9821	0.9195	1.0219	8.3311	3.6968	0.0316	0.0042	0.0425	0.0509	49.4944	48.2411	0.5339	1.0057	5	2.0734
CASE-308	female	78	34.4334	30.5021	34.659	30.5021	101.534	756.159	1.1289	0.9217	1.1363	7.4474	3.6924	0.0632	0.005	0.0354	0.0422	46.2019	39.9655	0.538	1.0074	6	1.671
CASE-309	female	62	36.996	29.2787	37.0977	29.2787	105.333	829.663	1.2636	0.9397	1.2671	7.8766	3.6569	0.0926	0.0018	0.0541	0.0628	48.0527	37.9701	0.6179	1.0085	6	2.1396
CASE-310	female	69	30.6307	28.1379	31.2456	28.1379	91.292	580.144	1.0886	0.8747	1.1104	6.3548	3.7902	0.0942	0.0049	0.0695	0.0752	49.0312	41.0111	0.8767	1.0218	6	1.0474
CASE-311	female	77	33.2509	28.0986	33.275	28.0986	93.828	658.834	1.1834	0.9404	1.1842	7.0217	3.6555	0.0724	0.0027	0.0463	0.038	44.8345	37.854	0.5747	1.0098	5	2.035
CASE-312	female	78	34.0999	31.7065	34.2545	31.7065	101.222	784.735	1.0755	0.9625	1.0804	7.7526	3.6134	0.0354	0.0028	0.0339	0.0391	44.9806	42.5752	0.4749	1.0054	6	1.2926
CASE-313	female	68	33.8736	31.6675	33.993	31.6675	102.978	797.143	1.0697	0.9446	1.0734	7.7409	3.6473	0.0468	0.0027	0.067	0.0523	46.7861	44.1092	0.6971	1.0117	5	1.4408
CASE-314	female	72	31.9846	29.0762	32.6523	29.0762	97.506	724.106	1.1	0.9571	1.123	7.4263	3.6235	0.0542	0.002	0.0444	0.0418	46.0023	40.9993	0.5857	1.0092	5	1.7939
CASE-315	female	67	27.4922	22.9908	27.6027	22.9908	78.7704	458.549	1.1958	0.9287	1.2006	5.8213	3.6785	0.0791	0.0025	0.0304	0.0248	39.1213	32.023	0.3993	1.0061	6	1.8055
CASE-316	female	62	36.6051	31.6513	36.7108	31.6513	107	860.821	1.1565	0.9448	1.1598	8.0451	3.6469	0.0556	0.0029	0.0407	0.0457	50.5221	44.1811	0.4707	1.0051	6	2.0504
CASE-317	female	71	30.3991	24.5171	30.4897	24.5171	87.6739	562.088	1.2399	0.9189	1.2436	6.4111	3.698	0.0928	0.0023	0.0436	0.0403	42.7649	33.6624	0.4924	1.0102	8	0.8225
CASE-318	female	67	35.4491	27.0343	35.7944	27.0343	97.4379	703.316	1.3113	0.9309	1.324	7.2181	3.6741	0.1053	0.0025	0.0267	0.0336	48.478	36.4217	0.4005	1.004	7	1.62
CASE-319	female	69	31.942	29.0777	31.9635	29.0777	92.4889	647.595	1.0985	0.9513	1.0992	7.0019	3.6344	0.0535	0.0023	0.0333	0.0363	42.5584	39.121	0.643	1.0121	4	2.3977
CASE-320	female	71	31.4942	28.2303	31.6043	28.2303	93.5448	642.611	1.1156	0.9228	1.1195	6.8696	3.6902	0.0756	0.003	0.0401	0.053	44.5635	37.1673	0.5536	1.0088	6	1.839
CASE-321	female	58	36.1112	29.1066	36.1454	29.1066	100.268	748.3	1.2407	0.9353	1.2418	7.463	3.6654	0.0761	0.0024	0.0276	0.0399	47.9952	39.6826	0.5506	1.0073	7	1.2799
CASE-322	female	71	31.6242	29.9216	31.8176	29.9216	93.6462	651.863	1.0569	0.9341	1.0634	6.9609	3.6679	0.0518	0.0027	0.0372	0.0509	45.8481	42.7288	0.6615	1.0132	5	1.4912
CASE-323	female	71	34.1601	28.1028	34.2059	28.1028	95.5492	669.102	1.2155	0.921	1.2172	7.0027	3.6939	0.086	0.0029	0.0526	0.0736	47.0463	38.4589	0.6518	1.013	7	1.096
CASE-324	female	72	29.3997	29.9968	30.1263	29.3997	90.8205	627.132	0.9801	0.9554	1.0247	6.9052	3.6266	0.0432	0.0024	0.0573	0.0489	44.2618	34.997	0.5677	1.0105	4	2.7898
CASE-325	female	68	31.0759	25.0848	31.1952	25.0848	89.4421	591.09	1.2388	0.9285	1.2436	6.6086	3.6789	0.1076	0.002	0.0992	0.0911	36.9615	28.8773	0.8154	1.0208	7	1.0789
CASE-326	female	65	29.3139	27.5328	29.3612	27.5328	86.2203	550.591	1.0647	0.9307	1.0664	6.3859	3.6745	0.0617	0.0025	0.0564	0.0559	32.3716	30.1859	0.7469	1.0196	5	1.41
CASE-327	female	57	27.2673	27.4164	27.4527	27.2673	83.0421	514.5	0.9946	0.9376	1.0068	6.1956	3.6611	0.0618	0.0022	0.0777	0.0797	31.4762	29.5128	0.7494	1.0199	5	1.5412
CASE-328	female	61	34.8519	26.6646	34.9004	26.6646	95.1645	664.944	1.307	0.9227	1.3089	6.9873	3.6905	0.0897	0.003	0.042	0.0529	39.008	31.0959	0.585	1.01	6	1.3335
CASE-329	female	72	31.4257	32.611	33.3707	31.4257	100.901	763.771	0.9637	0.9427	1.0619	7.5695	3.651	0.0501	0.0025	0.0488	0.0436	37.807	34.7284	0.6308	1.0102	5	2.1444
CASE-330	female	67	33.6376	25.4775	33.6509	25.4775	89.3597	571.583	1.3203	0.8995	1.3208	6.3964	3.7377	0.1046	0.0026	0.0463	0.0494	42.3803	32.8761	0.6957	1.0173	6	0.7651
CASE-331	female	72	35.6294	31.4555	35.7252	31.4555	102.291	797.077	1.1327	0.9573	1.1357	7.7923	3.6232	0.0581	0.0021	0.0203	0.0221	39.556	35.1127	0.6267	1.0091	4	2.887
CASE-332	female	62	31.4942	26.8856	31.4953	26.8856	89.1478	559.471	1.1714	0.8846	1.1715	6.2758	3.769	0.0875	0.0028	0.0675	0.0636	35.2835	30.0933	0.9081	1.0296	6	1.1653
CASE-333	female	60	31.6423	30.1225	31.6842	30.1225	95.165	676.761	1.0505	0.9391	1.0518	7.1114	3.6581	0.063	0.0022	0.0548	0.0571	37.1888	32.9859	0.668	1.0119	5	1.7645
CASE-334	female	67	31.5719	29.1212	31.9553	29.1212	94.7575	646.742	1.0842	0.9051	1.0973	6.8252	3.726	0.0674	0.003	0.0686	0.096	30.8247	27.859	0.7957	1.0194	6	0.9117
CASE-335	female	61	25.6354	26.2499	27.9474	25.6354	81.1502	479.221	0.9766	0.9145	1.0902	5.9054	3.707	0.1035	0.0024	0.0845	0.0759	33.7356	26.4131	0.7058	1.0194	7	0.8294
CASE-336	female	67	34.9857	31.626	35.1663	31.626	101.029	744.074	1.1062	0.9161	1.1119	7.3649	3.7037	0.0629	0.0027	0.0345	0.0448	50.396	46.0264	0.8414	1.0175	4	2.3665
CASE-337	female	68	27.8906	26.9925	28.6017	26.9925	84.8845	525.455	1.0333	0.9164	1.0596	6.1902	3.7031	0.0677	0.0025	0.0771	0.0782	42.6353	38.9982	0.807	1.0241	6	0.9955
CASE-338	female	79	33.4041	29.1654	33.5086	29.1654	95.905	691.263	1.1453	0.9444	1.1489	7.2078	3.6477	0.062	0.0022	0.0485	0.0419	45.6021	40.2436	0.6371	1.0115	6	1.2321
CASE-339	female	79	24.9498	22.736	25.2038	22.736	76.5928	431.094	1.0974	0.9234	1.1085	5.6284	3.6889	0.0666	0.0038	0.0874	0.0864	36.7877	32.969	0.6318	1.0169	6	1.3824
CASE-340	female	75	31.0152	28.3305	31.0153	28.3305	91.7632	622.751	1.0948	0.9294	1.0948	6.7865	3.6771	0.0576	0.003	0.0408	0.0589	43.1779	38.3817	0.534	1.0087	5	1.6122
CASE-341	female	77	38.0668	28.1268	38.0775	28.1268	107.12	836.762	1.3534	0.9164	1.3538	7.8114	3.7031	0.1071	0.0025	0.0454	0.0645	54.4598	41.5011	0.7438	1.0132	7	1.2297
CASE-342	female	54	35.673	27.3879	35.8326	27.3879	97.4075	706.811	1.3025	0.9361	1.3083	7.2562	3.6639	0.1033	0.0017	0.0248	0.0268	52.1265	39.1964	0.4487	1.0056	4	3.2858
CASE-343	female	60	29.8484	26.3395	29.8494	26.3395	84.138	530.625	1.1332	0.9419	1.1333	6.3066	3.6526	0.0716	0.002	0.0195	0.0163	40.8965	34.8322	0.533	1.011	4	1.8946
CASE-344	female	69	31.9829	31.1533	32.2463	31.1533	97.7402	729.327	1.0266	0.9594	1.0351	7.4619	3.6192	0.0392	0.0021	0.0516	0.0537	45.0485	44.2525	0.5927	1.0093	6	0.9844
CASE-345	female	67	35.138	27.8871	35.1477	27.8871	94.6822	648.032	1.26	0.9084	1.2604	6.8443	3.7194	0.091	0.0027	0.045	0.0502	46.4737	38.3304	0.8832	1.0227	5	2.0252
CASE-346	female	67	31.1534	27.3843	31.2178	27.3843	88.1578	573.104	1.1376	0.9267	1.14	6.5009	3.6825	0.0754	0.0024	0.0573	0.0485	40.5133	35.3628	0.7871	1.0224	5	1.5819
CASE-347	female	63	34.5225	29.7131	34.6306	29.7131	97.1921	699.044	1.1619	0.9299	1.1655	7.1924	3.676	0.0725	0.002	0.0409	0.0264	46.4265	39.9896	0.7271	1.0143	4	2.5898
CASE-348	female	61	34.2582	30.0476	34.2882	30.0476	98.8659	746.897	1.1401	0.9602	1.1411	7.5547	3.6176	0.0514	0.0022	0.029	0.0357	47.5481	42.3822	0.4864	1.0059	6	1.8921
CASE-349	female	59	27.3922	28.5603	30.444	27.3922	89.3199	601.315	0.9591	0.9471	1.1114	6.7322	3.6425	0.0633	0.0022	0.0647	0.071	42.9432	38.6228	0.7121	1.016	5	1.716
CASE-350	female	94	33.8972	28.7636	34.8589	28.7636	98.0866	711.145	1.1785	0.9289	1.2119	7.2502	3.6782	0.0791	0.0038	0.0539	0.0711	46.5718	38.3094	0.5794	1.0089	5	1.9899
CASE-351	female	57	33.8833	28.3672	33.8854	28.3672	96.7944	661.123	1.1945	0.8867	1.1945	6.8302	3.7645	0.073	0.0037	0.0362	0.041	47.6493	40.3248	0.6241	1.0112	4	2.4684
CASE-352	female	72	31.7779	26.6458	32.5126	26.6458	91.6107	608.228	1.1926	0.9107	1.2202	6.6393	3.7146	0.0747	0.0034	0.046	0.0446	45.6257	38.3288	0.5584	1.0109	5	1.994
CASE-353	female	78	31.7862	27.802	31.7869	27.802	92.6618	632.937	1.1433	0.9263	1.1433	6.8306	3.6832	0.0624	0.0036	0.0341	0.0365	45.1763	39.2419	0.5273	1.0086	5	2.143
CASE-354	female	85	29.2884	27.0155	29.3619	27.0155	85.2325	518.912	1.0841	0.8976	1.0869	6.0882	3.7416	0.0843	0.0032	0.0461	0.0242	42.3079	36.8292	0.8836	1.0281	4	1.8198
CASE-355	female	67	33.67	29.8386	34.3193	29.8386	100.6	721.717	1.1284	0.8961	1.1502	7.1741	3.7447	0.0989	0.0028	0.1226	0.1007	50.07	41.8862	1.1562	1.0331	7	1.1109
CASE-356	female	103	35.345	29.2733	35.4749	29.2733	99.2301	721.699	1.2074	0.921	1.2118	7.273	3.6937	0.0763	0.0033	0.03	0.0307	48.3055	40.2184	0.6083	1.0108	6	1.3873
CASE-357	female	82	33.9496	32.24	34.7543	32.24	104.993	790.789	1.053	0.9015	1.078	7.5318	3.7336	0.0619	0.0035	0.0543	0.0625	41.621	38.6112	0.8784	1.0187	4	2.55
CASE-358	female	78	33.2698	28.9247	33.7315	28.9247	96.8932	692.674	1.1502	0.9272	1.1662	7.1488	3.6815	0.0593	0.0032	0.0477	0.0477	37.8042	34.0009	0.7099	1.0133	6	0.8551
CASE-359	female	80	31.5795	26.6413	31.6234	26.6413	89.6441	590.425	1.1854	0.9233	1.187	6.5863	3.6893	0.0752	0.003	0.0566	0.0725	35.7076	30.5431	0.6809	1.0151	6	1.0857
CASE-360	female	76	30.1261	26.5335	30.137	26.5335	87.2232	550.04	1.1354	0.9085	1.1358	6.3061	3.7191	0.0809	0.0028	0.055	0.0504	34.733	29.7755	0.7787	1.0211	6	1.104
CASE-361	female	75	32.9189	26.3109	33.0046	26.3109	89.9381	595.698	1.2512	0.9254	1.2544	6.6234	3.6849	0.0825	0.0028	0.0241	0.0264	36.6969	29.9411	0.5752	1.0108	6	1.3255
CASE-362	female	62	34.3883	26.788	34.3884	26.788	96.6144	706.484	1.2837	0.9511	1.2837	7.3124	3.6349	0.0875	0.0018	0.0333	0.03	41.1928	32.6492	0.3994	1.0041	7	1.5781
CASE-363	female	81	32.4833	26.8533	32.5573	26.8533	91.4485	626.442	1.2097	0.9413	1.2124	6.8502	3.6537	0.0789	0.0024	0.0497	0.0587	36.5271	30.1714	0.5625	1.0093	6	1.333
CASE-364	female	80	36.0014	28.1872	36.5983	28.1872	102.632	792.466	1.2772	0.9454	1.2984	7.7214	3.6458	0.0922	0.0022	0.0417	0.0377	43.7866	34.2141	0.4485	1.0049	5	3.0142
CASE-365	female	70	31.0281	29.4306	34.6504	29.4306	98.1466	710.986	1.0543	0.9275	1.1774	7.2441	3.6808	0.0657	0.002	0.0576	0.0454	37.6454	34.7652	0.906	1.0229	4	1.9875
CASE-366	female	86	37.7779	33.9331	37.779	33.9331	110.531	899.068	1.1133	0.9248	1.1133	8.1341	3.6863	0.0533	0.0035	0.0497	0.0391	42.2453	39.2414	0.7895	1.0129	6	1.3013
CASE-367	female	62	34.454	27.9938	34.506	27.9938	97.2101	704.794	1.2308	0.9372	1.2326	7.2502	3.6617	0.083	0.0024	0.023	0.0208	39.8047	31.966	0.412	1.004	7	1.4994
CASE-368	female	76	38.0883	28.6013	38.4327	28.6013	107.708	825.045	1.3317	0.8937	1.3437	7.66	3.7498	0.1047	0.0035	0.0403	0.0487	48.8975	37.4507	0.6645	1.01	6	1.8133
CASE-369	female	67	30.0138	27.9785	30.0438	27.9785	90.6279	607.242	1.0727	0.9291	1.0738	6.7004	3.6777	0.0442	0.003	0.0508	0.0424	34.9747	33.1054	0.571	1.01	5	1.8334
CASE-370	female	70	26.709	28.9765	29.4358	26.709	88.5849	566.696	0.9217	0.9075	1.1021	6.3972	3.7212	0.0704	0.0031	0.097	0.0956	34.4265	31.6975	0.8669	1.025	5	1.49
CASE-371	female	74	32.1607	28.0368	32.3799	28.0368	93.1175	640.368	1.1471	0.9281	1.1549	6.877	3.6797	0.0694	0.0035	0.0477	0.0645	39.5534	33.7989	0.5726	1.0095	5	2.3897
CASE-372	female	74	31.4538	28.6414	31.5332	28.6414	94.0763	667.223	1.0982	0.9474	1.101	7.0924	3.642	0.0479	0.0027	0.0414	0.0564	37.3387	34.2959	0.5404	1.0078	6	0.9271
CASE-373	female	63	28.9222	27.6201	28.983	27.6201	86.7466	566.688	1.0471	0.9463	1.0493	6.5327	3.644	0.0423	0.0025	0.03	0.036	32.9182	31.6596	0.5456	1.0088	5	1.7323
CASE-374	female	72	32.0536	23.3004	32.5606	23.3004	87.1728	549.281	1.3757	0.9083	1.3974	6.3011	3.7195	0.135	0.0023	0.0469	0.0494	40.4336	28.2681	0.5649	1.0106	6	1.604
CASE-375	female	69	34.1023	32.1327	34.2758	32.1327	102.362	799.842	1.0613	0.9593	1.0667	7.8139	3.6194	0.0357	0.0022	0.0273	0.0266	38.6194	36.9646	0.5181	1.006	5	2.1405
CASE-376	female	55	27.6359	24.5317	27.8122	24.5317	80.8557	495.97	1.1265	0.9533	1.1337	6.134	3.6306	0.0648	0.0017	0.0399	0.0481	32.7746	28.3531	0.4788	1.0084	6	1.5195
CASE-377	female	65	33.0957	29.9353	33.5635	29.9353	98.6472	740.508	1.1056	0.9562	1.1212	7.5066	3.6251	0.0693	0.0018	0.0515	0.0381	38.8104	32.7427	0.5341	1.0076	7	1.4036
CASE-378	female	77	35.3692	30.5733	35.4931	30.5733	127.834	765.814	1.1569	0.5889	1.1609	5.9907	4.6194	0.1881	0.2124	0.1673	0.0652	38.716	35.2176	2.5944	0.9762	6	2.6443
CASE-379	female	73	32.5783	27.0038	32.671	27.0038	92.7403	635.436	1.2064	0.9284	1.2099	6.8518	3.679	0.0885	0.0023	0.0767	0.0945	38.4671	31.5131	0.7277	1.0152	6	1.4281
CASE-380	female	83	30.6437	26.8641	31.0713	26.8641	90.5945	580.127	1.1407	0.8882	1.1566	6.4036	3.7613	0.0942	0.0032	0.0924	0.0788	35.5206	30.0579	0.9665	1.0247	6	1.0668
CASE-381	female	84	32.8871	29.6472	33.0788	29.6472	99.2944	721.245	1.1093	0.9193	1.1157	7.2637	3.6973	0.0588	0.0027	0.0617	0.0853	38.4818	35.8612	0.809	1.0182	6	1.2245
CASE-382	female	72	30.0034	26.0057	30.0322	26.0057	86.7663	559.269	1.1537	0.9335	1.1548	6.4457	3.6689	0.0621	0.0022	0.0481	0.0691	34.9193	30.7059	0.5946	1.0113	6	1.5232
CASE-383	female	81	33.2925	26.873	33.6679	26.873	94.3256	609.168	1.2389	0.8604	1.2529	6.4581	3.8217	0.1047	0.0035	0.0677	0.0541	37.8419	29.7783	0.8588	1.0224	6	0.8988
CASE-384	female	75	33.9782	26.6591	34.0093	26.6591	92.9688	638.269	1.2745	0.928	1.2757	6.8654	3.6799	0.0909	0.0029	0.0173	0.0151	38.2133	30.5091	0.6022	1.0104	6	1.0793
CASE-385	female	69	35.5431	31.826	36.0128	31.826	106.008	845.448	1.1168	0.9454	1.1316	7.9753	3.6458	0.0554	0.0021	0.0484	0.0512	41.0217	36.3045	0.5634	1.0066	6	1.5752
CASE-386	female	71	29.5884	27.4623	30.1253	27.4623	89.4888	607.135	1.0774	0.9527	1.097	6.7845	3.6318	0.0563	0.0019	0.0607	0.0727	35.0356	31.2469	0.5729	1.0105	5	1.7964
CASE-387	female	69	33.6878	29.6813	33.8565	29.6813	100.256	721.373	1.135	0.9019	1.1407	7.1953	3.7328	0.072	0.0022	0.0565	0.0388	39.5695	33.8962	0.7641	1.0128	4	3.1733
CASE-388	female	77	35.1324	29.0797	35.1391	29.0797	100.836	760.355	1.2081	0.9397	1.2084	7.5405	3.6568	0.0707	0.0025	0.0543	0.0776	41.2719	35.0315	0.6272	1.0097	6	2.1575
CASE-389	female	55	28.8359	26.597	28.8455	26.597	86.6251	557.951	1.0842	0.9344	1.0845	6.441	3.6673	0.0676	0.0021	0.0873	0.0941	35.8003	32.2417	0.77	1.0195	5	1.5128
CASE-390	female	63	35.8273	27.5527	35.8273	27.5527	98.7278	705.01	1.3003	0.9089	1.3003	7.141	3.7183	0.113	0.0024	0.0441	0.0452	44.2632	33.0041	0.6359	1.0104	7	0.9999
CASE-391	female	57	27.5953	26.2886	29.2386	26.2886	86.7627	530.48	1.0497	0.8855	1.1122	6.1141	3.767	0.0948	0.0022	0.1409	0.1249	34.413	31.1147	1.1628	1.0435	6	1.2183
CASE-392	female	89	35.3521	28.1103	36.2163	28.1103	102.211	744.543	1.2576	0.8956	1.2884	7.2844	3.7459	0.0993	0.0038	0.0688	0.0596	42.2123	33.4281	0.7917	1.0163	6	1.2704
CASE-393	female	83	34.2078	27.4802	34.2083	27.4802	96.0688	695.534	1.2448	0.947	1.2448	7.24	3.6427	0.0824	0.0024	0.0525	0.0525	41.9201	34.0472	0.531	1.0079	6	1.8525
CASE-394	female	78	33.6463	29.0012	33.6494	29.0012	96.3031	689.446	1.1602	0.9342	1.1603	7.1591	3.6677	0.0642	0.0023	0.0588	0.0524	37.9617	33.3947	0.6643	1.0123	6	1.1352
CASE-395	female	73	30.4254	27.8432	30.427	27.8432	89.6311	594.147	1.0927	0.9294	1.0928	6.6288	3.6772	0.0642	0.003	0.0493	0.0474	35.872	31.6731	0.6686	1.0143	6	0.8565
CASE-396	female	63	33.8158	28.339	33.8796	28.339	95.6065	682.556	1.1933	0.9384	1.1955	7.1392	3.6595	0.0726	0.0021	0.0276	0.0385	35.6971	29.9856	0.5758	1.0083	6	1.5379
CASE-397	female	79	27.7982	27.5671	32.3803	27.5671	89.6722	602.758	1.0084	0.942	1.1746	6.7218	3.6525	0.0798	0.0022	0.0459	0.0411	38.0565	31.1932	0.5197	1.0084	6	1.4089
CASE-398	female	67	35.3363	29.4209	35.3982	29.4209	100.415	736.968	1.2011	0.9185	1.2032	7.3393	3.6989	0.08	0.0027	0.0474	0.0539	51.5136	42.9648	0.679	1.0126	6	1.2787
CASE-399	female	62	33.5501	28.8948	33.6678	28.8948	97.8273	709.163	1.1611	0.9312	1.1652	7.2491	3.6736	0.0683	0.0022	0.0608	0.048	47.117	40.6295	0.6855	1.012	6	1.5524
CASE-400	female	58	30.612	28.8444	30.9939	28.8444	98.3944	656.945	1.0613	0.8527	1.0745	6.6766	3.8389	0.0483	0.0101	0.0447	0.0427	44.3854	41.479	0.5771	1.0003	5	1.9396
CASE-401	female	54	31.7803	27.5772	31.8834	27.5772	89.2968	586.462	1.1524	0.9242	1.1562	6.5676	3.6874	0.0766	0.0025	0.0577	0.0539	41.6069	36.0656	0.7587	1.0192	4	2.098
CASE-402	female	52	35.0283	27.2265	35.3277	27.2265	97.5805	695.089	1.2866	0.9173	1.2975	7.1232	3.7012	0.1102	0.0022	0.057	0.0567	49.7314	37.4985	0.5883	1.0105	4	3.3146
CASE-403	female	70	31.4683	27.9356	31.4831	27.9356	91.877	640.418	1.1265	0.9534	1.127	6.9704	3.6306	0.0531	0.0026	0.0414	0.0504	45.6331	40.6932	0.4754	1.0068	6	1.2986
CASE-404	female	59	35.4408	29.3865	35.7755	29.3865	100.505	762.869	1.206	0.949	1.2174	7.5903	3.6389	0.0678	0.0025	0.0363	0.047	48.7269	41.0061	0.4486	1.0051	7	1.5532
CASE-405	female	70	34.5282	26.6264	34.5337	26.6264	93.442	641.564	1.2968	0.9233	1.297	6.8659	3.6891	0.099	0.0026	0.0198	0.0125	47.5962	37.2432	0.6526	1.0117	4	2.5921
CASE-406	female	63	32.7667	29.1028	32.7866	29.1028	97.7845	680.337	1.1259	0.8941	1.1266	6.9575	3.7489	0.0767	0.0026	0.0535	0.0516	46.5051	40.1815	0.775	1.0162	6	1.1035
CASE-407	female	60	35.6234	29.2746	35.7432	29.2746	100.759	733.575	1.2169	0.908	1.221	7.2805	3.7202	0.0875	0.0022	0.0588	0.0607	50.3945	41.1714	0.7385	1.014	6	1.4534
CASE-408	female	65	32.641	27.6666	32.7205	27.6666	93.7242	651.371	1.1798	0.9318	1.1827	6.9499	3.6723	0.0621	0.0033	0.0387	0.0472	44.955	38.9578	0.5147	1.0074	6	1.5206
CASE-409	female	74	36.7445	31.8863	36.8505	31.8863	107.181	863.198	1.1524	0.9442	1.1557	8.0536	3.6481	0.0512	0.0032	0.0413	0.0372	56.1878	50.5169	0.5768	1.0072	6	1.6831
CASE-410	female	37	35.6288	29.111	35.9261	29.111	100.013	743.199	1.2239	0.9337	1.2341	7.431	3.6686	0.083	0.0016	0.0546	0.0511	50.117	41.3954	0.7056	1.0127	6	1.6918
CASE-411	female	65	33.9822	29.0255	34.2605	29.0255	98.7825	725.551	1.1708	0.9344	1.1804	7.3449	3.6673	0.0585	0.0029	0.039	0.0535	49.4376	43.6559	0.5863	1.0098	5	2.1311
CASE-412	female	59	35.0414	28.9767	35.2983	28.9767	99.1312	726.051	1.2093	0.9284	1.2182	7.3241	3.679	0.0754	0.0023	0.0267	0.0343	48.4486	40.6075	0.6549	1.0109	6	1.2706
CASE-413	female	66	32.4393	25.3672	32.4685	25.3672	88.1355	573.423	1.2788	0.9276	1.2799	6.5062	3.6806	0.0945	0.0026	0.0272	0.0303
CASE-414	female	69	34.6277	28.3716	34.7458	28.3716	96.4181	695.035	1.2205	0.9395	1.2247	7.2085	3.6573	0.0772	0.0024	0.034	0.0309	46.2949	38.504	0.627	1.0109	6	1.4934
CASE-415	female	64	32.2852	31.2215	32.4412	31.2215	96.8975	693.929	1.0341	0.9288	1.0391	7.1615	3.6784	0.0611	0.0024	0.0736	0.0845	43.5212	42.8465	0.9212	1.0218	4	2.3351
CASE-416	female	66	32.816	27.3811	33.0922	27.3811	94.8061	660.327	1.1985	0.9232	1.2086	6.965	3.6894	0.0724	0.0032	0.0419	0.0285	46.0703	38.8696	0.5668	1.0085	6	1.6896
CASE-417	female	70	29.0606	26.0386	29.3649	26.0386	83.6405	521.131	1.1161	0.9361	1.1277	6.2306	3.6639	0.0691	0.003	0.0244	0.0264	41.4858	35.3854	0.5434	1.0108	4	2.3977
CASE-418	female	67	38.0935	28.4131	38.4113	28.4131	103.126	760.201	1.3407	0.8983	1.3519	7.3716	3.7403	0.1242	0.0032	0.0312	0.0215	53.2936	38.283	0.6347	1.0095	4	3.0788
CASE-419	female	55	30.6448	29.9424	30.7166	29.9424	91.961	638.262	1.0235	0.9484	1.0259	6.9406	3.64	0.0509	0.002	0.0595	0.0631	42.0705	40.6993	0.7208	1.0153	4	2.3327
CASE-420	female	54	29.362	26.0582	29.5445	26.0582	85.039	532.043	1.1268	0.9245	1.1338	6.2565	3.6868	0.076	0.0021	0.0638	0.0535	47.5038	41.1346	0.7244	1.0185	5	1.4757
CASE-421	female	83	37.8404	27.4324	38.0078	27.4324	101.093	725.334	1.3794	0.8919	1.3855	7.1749	3.7536	0.1186	0.0028	0.056	0.0635	52.867	39.1513	0.8097	1.0155	6	1.8726
CASE-422	female	77	33.5512	28.0787	33.645	28.0787	94.776	672.43	1.1949	0.9407	1.1982	7.0949	3.6549	0.0825	0.0025	0.0618	0.0705	55.5766	46.1406	0.693	1.0138	6	1.368
CASE-423	female	59	30.3647	26.4718	31.0513	26.4718	91.1206	630.932	1.1471	0.9549	1.173	6.9241	3.6276	0.062	0.0025	0.0341	0.0416	44.9143	38.4016	0.4009	1.0048	6	1.9021
CASE-424	female	60	31.0086	30.9472	32.284	30.9472	97.5226	723.801	1.002	0.9564	1.0432	7.4219	3.6249	0.0425	0.0023	0.0519	0.0423	45.386	42.9483	0.5884	1.0093	7	0.8257
CASE-425	female	95	34.6498	30.466	34.6689	30.466	100.404	716.506	1.1373	0.8932	1.138	7.1362	3.751	0.0869	0.003	0.0885	0.064	44.9595	38.7507	1.0356	1.0258	5	1.6426
CASE-426	female	75	35.1609	30.6078	35.162	30.6078	101.601	775.506	1.1488	0.9441	1.1488	7.6329	3.6484	0.0516	0.0026	0.0293	0.0362	47.5739	42.6456	0.5668	1.0077	6	1.2218
CASE-427	female	77	37.3753	31.4716	37.4074	31.4716	107.572	893.24	1.1876	0.97	1.1886	8.3037	3.5993	0.0539	0.0022	0.0226	0.0263	52.0137	45.1575	0.3548	1.0029	6	2.6344
CASE-428	female	78	30.8235	23.9779	30.8646	23.9779	85.3415	528.273	1.2855	0.9115	1.2872	6.1901	3.713	0.1063	0.0033	0.0574	0.047	37.7885	28.8903	0.5901	1.0128	7	0.9872
CASE-429	female	71	32.6417	26.5667	32.7616	26.5667	91.118	613.868	1.2287	0.9291	1.2332	6.7371	3.6776	0.0838	0.0023	0.0494	0.0623	35.9397	29.5801	0.6642	1.0119	6	1.7785
CASE-430	female	67	32.2432	30.6032	32.2449	30.6032	98.8483	710.332	1.0536	0.9136	1.0536	7.1861	3.7088	0.064	0.0047	0.0345	0.0453	36.4777	31.6069	0.5685	1.0076	6	1.317
CASE-431	female	96	35.1775	31.0168	35.2509	31.0168	102.112	722.596	1.1341	0.8709	1.1365	7.0765	3.7986	0.0942	0.0038	0.0471	0.071	39.7555	33.2222	0.969	1.0248	4	2.4219
CASE-432	female	87	32.5572	28.4779	32.6273	28.4779	94.1223	673.163	1.1432	0.9549	1.1457	7.152	3.6277	0.0633	0.0025	0.0274	0.0289	36.8738	31.7068	0.4666	1.0061	4	3.3626
CASE-433	female	89	36.3823	31.3432	36.3967	31.3432	102.101	772.501	1.1608	0.9312	1.1612	7.5661	3.6735	0.0838	0.0026	0.079	0.07	39.7141	33.9209	0.9312	1.0213	6	1.2763
CASE-434	female	74	30.7136	23.9199	30.7653	23.9199	84.1462	531.242	1.284	0.9428	1.2862	6.3133	3.6508	0.0963	0.0022	0.0278	0.0184	42.2205	32.574	0.3746	1.0047	6	2.0517
CASE-435	female	73	42.1516	31.4688	42.1797	31.4688	117.326	938.813	1.3395	0.857	1.3404	8.0017	3.8292	0.1143	0.0052	0.0406	0.0337	47.12	34.9453	0.7105	1.0081	5	2.8674
CASE-436	female	90	31.7933	26.5163	31.8823	26.5163	89.3321	552.377	1.199	0.8698	1.2024	6.1834	3.8009	0.1129	0.0029	0.059	0.0646	36.0767	28.7105	0.9675	1.0306	4	1.9697
CASE-437	female	82	33.3682	30.2627	33.4681	30.2627	98.4793	725.023	1.1026	0.9394	1.1059	7.3622	3.6574	0.0596	0.0024	0.0594	0.0621	38.7763	34.6822	0.6903	1.0121	6	0.9652
CASE-438	female	76	33.8823	27.1451	34.3562	27.1451	93.2596	646.301	1.2482	0.9338	1.2656	6.9301	3.6684	0.0929	0.0025	0.0346	0.0351	38.287	30.4517	0.6148	1.0112	4	2.7676
CASE-439	female	70	29.3015	24.2844	30.7852	24.2844	86.4122	549.089	1.2066	0.9241	1.2677	6.3543	3.6877	0.0851	0.0023	0.0326	0.0309	34.9216	28.5064	0.6137	1.0119	4	2.3724
CASE-440	female	72	30.88	25.5512	31.1638	25.5512	87.1794	555.543	1.2086	0.9185	1.2197	6.3724	3.6988	0.085	0.003	0.0381	0.0356	33.2119	27.0678	0.5834	1.0113	4	2.6743
CASE-441	female	85	33.5534	26.2636	33.7283	26.2636	93.9179	642.033	1.2776	0.9147	1.2842	6.8361	3.7065	0.1003	0.003	0.0356	0.0527	39.5978	30.4819	0.4933	1.0064	7	1.2719
CASE-442	female	80	33.4551	30.0215	33.724	30.0215	99.1726	725.675	1.1144	0.9272	1.1233	7.3173	3.6815	0.0642	0.0026	0.0677	0.094	38.4905	34.266	0.7757	1.0166	6	1.032
CASE-443	female	93	30.7304	26.5984	30.774	26.5984	105.416	593.756	1.1554	0.6714	1.157	5.6325	4.3262	0.114	0.096	0.1006	0.0395	44.3245	39.0198	1.3557	0.9768	6	1.4209
CASE-444	female	81	33.8226	29.782	33.8617	29.782	98.477	741.156	1.1357	0.9604	1.137	7.5262	3.6173	0.0495	0.0025	0.0288	0.0248	47.7157	42.5628	0.4417	1.0047	6	1.4794
CASE-445	female	93	31.8893	26.4133	32.2715	26.4133	89.7132	587.539	1.2073	0.9173	1.2218	6.5491	3.7012	0.0948	0.003	0.0637	0.052	47.3174	37.8901	0.6824	1.0152	4	2.3996
CASE-446	female	74	34.5024	29.3904	34.8333	29.3904	100.5	724.647	1.1739	0.9016	1.1852	7.2104	3.7334	0.0858	0.0029	0.0842	0.1033	49.4577	41.9066	0.9096	1.0234	6	1.171
CASE-447	female	85	35.5385	29.3859	35.5735	29.3859	100.074	709.337	1.2094	0.8901	1.2106	7.0881	3.7575	0.0823	0.0038	0.0534	0.0533	48.336	40.4867	0.7955	1.0166	6	1.191
CASE-448	female	80	35.6046	28.4212	35.853	28.4212	99.7845	723.223	1.2527	0.9128	1.2615	7.2479	3.7105	0.0921	0.0031	0.0301	0.027	52.2467	41.936	0.7163	1.0116	5	2.9512
CASE-449	female	64	33.5629	32.3133	35.8209	32.3133	103.267	787.924	1.0387	0.9285	1.1086	7.63	3.6789	0.0778	0.003	0.067	0.06	51.0623	42.7534	0.7526	1.0139	5	2.6829
CASE-450	female	79	34.494	31.3978	34.518	31.3978	103.238	784.662	1.0986	0.9251	1.0994	7.6005	3.6855	0.0522	0.0032	0.0461	0.0564	47.9255	43.8685	0.6788	1.0108	6	1.3043
CASE-451	female	94	29.7061	26.449	29.8279	26.449	87.5614	545.668	1.1231	0.8944	1.1278	6.2318	3.7484	0.0853	0.0035	0.0805	0.0722	42.4491	36.7292	0.8514	1.0206	6	1.2218
CASE-452	female	82	29.1395	25.7531	29.2841	25.7531	84.7903	534.647	1.1315	0.9345	1.1371	6.3055	3.667	0.0785	0.0028	0.0557	0.0442	41.8188	34.7407	0.6222	1.0132	6	1.1215
CASE-453	female	94	32.0578	29.7328	32.1944	29.7328	95.6298	695.211	1.0782	0.9553	1.0828	7.2698	3.6269	0.0549	0.0029	0.0716	0.0633	46.3529	42.7445	0.6866	1.0123	6	1.5055
CASE-454	female	83	36.8666	30.0182	36.8723	30.0182	107.252	818.605	1.2281	0.8943	1.2283	7.6326	3.7486	0.0821	0.0035	0.0574	0.0826	52.5679	43.8568	0.8301	1.0143	6	1.6753
CASE-455	female	85	32.1183	28.4367	33.3874	28.4367	96.5052	691.256	1.1295	0.9327	1.1741	7.1629	3.6706	0.0671	0.003	0.064	0.0461	46.919	40.774	0.6578	1.0122	5	1.9891
CASE-456	female	86	34.1618	28.8104	34.1645	28.8104	97.596	706.836	1.1857	0.9325	1.1858	7.2425	3.6709	0.0727	0.0039	0.0453	0.04	48.0702	40.185	0.517	1.007	6	1.657
CASE-457	female	98	30.0935	25.5273	30.4602	25.5273	87.4042	555.244	1.1789	0.9133	1.1932	6.3526	3.7093	0.09	0.0033	0.0525	0.0494	45.1056	36.5183	0.589	1.0102	6	1.5884
CASE-458	female	85	33.406	28.7435	33.7238	28.7435	98.4432	730.789	1.1622	0.9476	1.1733	7.4235	3.6416	0.0621	0.0025	0.0357	0.0324	42.2466	36.6362	0.5888	1.0087	6	1.3326
CASE-459	female	91	29.3884	26.5839	30.2393	26.5839	86.3826	533.816	1.1055	0.899	1.1375	6.1797	3.7388	0.0853	0.0035	0.0447	0.0357	42.5641	36.4438	0.8226	1.0232	4	1.743
CASE-460	female	79	36.0559	27.8916	36.4661	27.8916	101.189	717.602	1.2927	0.8807	1.3074	7.0917	3.7774	0.1061	0.0028	0.0738	0.0773	50.5441	39.5352	0.8773	1.0221	6	1.3605
CASE-461	female	68	36.523	30.5479	37.8834	30.5479	105.86	818.908	1.1956	0.9183	1.2401	7.7358	3.6992	0.0912	0.0026	0.0591	0.0427	53.2197	42.6612	0.733	1.0123	5	2.2956
CASE-462	female	77	26.824	25.1665	26.9889	25.1665	82.0011	499.742	1.0659	0.9339	1.0724	6.0943	3.6681	0.0515	0.0029	0.0438	0.0352	39.5299	36.5021	0.5313	1.0101	7	1.0377
CASE-463	female	66	35.2011	29.6864	35.2063	29.6864	99.261	701.623	1.1858	0.8949	1.1859	7.0685	3.7474	0.0953	0.0026	0.0863	0.1144	48.0984	40.0592	1.0279	1.0272	6	1.0541
CASE-464	female	60	38.5503	29.5149	38.8787	29.5149	105.92	797.28	1.3061	0.893	1.3173	7.5272	3.7512	0.1118	0.0023	0.0651	0.0761	55.1531	42.3172	0.9126	1.0218	6	1.3313
CASE-465	female	88	30.5258	28.4648	32.1386	28.4648	93.3184	632.774	1.0724	0.9131	1.1291	6.7808	3.7097	0.0772	0.003	0.0914	0.1006	45.4689	41.7769	1.0076	1.031	6	1.3642
CASE-466	female	95	32.1002	29.9346	32.8537	29.9346	96.6165	680.542	1.0723	0.9161	1.0975	7.0437	3.7036	0.0668	0.0034	0.0884	0.0733	42.9688	39.3059	0.8748	1.0211	5	1.9456
CASE-467	female	94	31.0775	25.7582	32.2594	25.7582	90.8657	567.089	1.2065	0.8631	1.2524	6.241	3.8157	0.1091	0.0036	0.0687	0.0585	47.5418	36.9564	0.7558	1.018	5	1.3953
CASE-468	female	81	30.6325	24.7069	30.9459	24.7069	84.7289	527.953	1.2398	0.9241	1.2525	6.2311	3.6875	0.0982	0.0027	0.0249	0.016	42.5918	33.2713	0.5267	1.0102	4	2.3489
CASE-469	female	103	34.0704	27.6724	34.6999	27.6724	98.4641	705.586	1.2312	0.9145	1.254	7.1659	3.7068	0.0941	0.0034	0.0627	0.0614	49.5306	38.8814	0.57	1.0087	5	1.7699
CASE-470	female	76	37.2175	31.5358	37.2255	31.5358	106.756	805.28	1.1802	0.8879	1.1804	7.5432	3.762	0.0768	0.0032	0.0545	0.0349	50.6431	44.0861	0.9727	1.0201	6	1.392
CASE-471	female	75	29.0227	27.2458	30.143	27.2458	86.7482	541.86	1.0652	0.9048	1.1063	6.2464	3.7266	0.0712	0.0027	0.068	0.0586	41.6139	39.0324	0.8976	1.0305	4	1.6628
CASE-472	female	82	33.2103	30.8575	33.8844	30.8575	101.959	755.203	1.0762	0.9129	1.0981	7.4069	3.7102	0.0671	0.003	0.0863	0.0849	47.9891	43.1228	0.8682	1.0197	7	1.1212
CASE-473	female	93	32.4164	26.8192	32.522	26.8192	95.0886	569.172	1.2087	0.791	1.2126	5.9857	3.9857	0.1047	0.005	0.0799	0.0968	54.8242	44.4793	0.962	1.0335	6	0.712
