# Supplementary material
Source: Research Square preprint supplement (doi:10.21203/rs.3.rs-8928788/v1)
Supplement: Supplementary file 3 [file 44b56fdaad68565471d36433.xlsx]

## Sheet: Sayfa1
Specimen	Sex	Optimal Polygon	RMSE at Optimal (mm)	RMSE 3-sided (mm)	RMSE 13-sided (mm)	Total Improvement (%)	Remaining Improvement (%)	Efficiency Ratio
CASE-1	male	6	1.3465	6.043	0.2402	77.72	18.31	4.245
CASE-2	male	6	1.987	9.2216	0.3024	78.45	18.27	4.295
CASE-3	male	6	1.2707	7.843	0.3309	83.8	11.98	6.993
CASE-4	male	6	2.0187	8.015	0.5492	74.81	18.33	4.081
CASE-5	male	7	1.0227	7.3179	0.3181	86.02	9.63	8.935
CASE-6	male	7	2.1135	8.7867	0.4507	75.95	18.92	4.013
CASE-7	male	4	3.0327	7.0524	0.3421	57	38.15	1.494
CASE-8	male	6	1.7694	7.9716	0.392	77.8	17.28	4.503
CASE-9	male	6	1.3101	5.6748	0.322	76.91	17.41	4.417
CASE-10	male	7	1.4375	8.7583	0.34	83.59	12.53	6.67
CASE-11	male	4	3.0813	8.5273	0.3892	63.87	31.57	2.023
CASE-12	male	6	1.5352	7.9726	0.4186	80.74	14.01	5.765
CASE-13	male	6	1.3699	5.5233	0.4692	75.2	16.31	4.612
CASE-14	male	6	1.5398	7.951	0.3272	80.63	15.25	5.287
CASE-15	male	6	1.2284	6.9651	0.2834	82.36	13.57	6.07
CASE-16	male	5	1.5696	6.2521	0.4186	74.89	18.41	4.068
CASE-17	male	4	3.4377	7.3275	0.355	53.08	42.07	1.262
CASE-18	male	5	3.0653	9.0002	0.4467	65.94	29.1	2.266
CASE-19	male	6	1.5252	7.2035	0.5139	78.83	14.04	5.615
CASE-20	male	6	1.6798	5.6216	0.3826	70.12	23.08	3.039
CASE-21	male	4	3.483	8.8568	0.2866	60.67	36.09	1.681
CASE-22	male	6	1.3319	8.9501	0.3471	85.12	11	7.735
CASE-23	male	7	1.8713	8.8319	0.3468	78.81	17.26	4.566
CASE-24	male	6	1.0412	7.2008	0.3439	85.54	9.68	8.833
CASE-25	male	6	1.0552	7.2948	0.2922	85.53	10.46	8.178
CASE-26	male	6	1.2709	6.5693	0.2978	80.65	14.81	5.445
CASE-27	male	6	1.234	6.7257	0.3162	81.65	13.65	5.983
CASE-28	male	7	1.7284	7.7503	0.3002	77.7	18.43	4.216
CASE-29	male	4	3.0106	8.4499	0.4719	64.37	30.04	2.143
CASE-30	male	7	1.5747	7.5008	0.3782	79.01	15.95	4.953
CASE-31	male	6	1.2222	7.1858	0.2732	82.99	13.21	6.284
CASE-32	male	6	1.3032	8.4034	0.3593	84.49	11.23	7.522
CASE-33	male	5	1.7687	7.1478	0.3745	75.26	19.51	3.858
CASE-34	male	6	1.6567	6.9092	0.3898	76.02	18.34	4.146
CASE-35	male	4	2.7549	8.0942	0.2648	65.96	30.76	2.144
CASE-36	male	6	1.7554	8.1827	0.5237	78.55	15.05	5.218
CASE-37	male	6	1.7428	6.5401	0.3915	73.35	20.66	3.55
CASE-38	male	6	1.1311	6.7438	0.374	83.23	11.23	7.414
CASE-39	male	7	1.8188	8.6744	0.4107	79.03	16.23	4.869
CASE-40	male	6	1.0744	7.898	0.3811	86.4	8.78	9.842
CASE-41	male	6	1.2906	8.0627	0.4523	83.99	10.4	8.079
CASE-42	male	7	0.8419	8.4592	0.3063	90.05	6.33	14.221
CASE-43	male	4	2.7019	7.3967	0.4849	63.47	29.97	2.118
CASE-44	male	6	1.9074	5.8691	0.5003	67.5	23.97	2.816
CASE-45	male	5	1.8136	7.3538	0.2984	75.34	20.6	3.656
CASE-46	male	7	1.8054	5.4309	0.4268	66.76	25.38	2.63
CASE-47	male	6	2.3013	8.2853	0.4319	72.22	22.56	3.201
CASE-48	male	4	2.9795	8.2533	0.4468	63.9	30.69	2.082
CASE-49	male	6	2.7901	10.3745	0.4277	73.11	22.77	3.21
CASE-50	male	5	1.9086	7.0864	0.4403	73.07	20.72	3.526
CASE-51	male	7	1.6779	8.186	0.3143	79.5	16.66	4.773
CASE-52	male	7	1.1697	8.2788	0.3776	85.87	9.57	8.974
CASE-53	male	6	1.5856	7.9985	0.5331	80.18	13.16	6.093
CASE-54	male	6	1.7599	6.953	0.3232	74.69	20.66	3.615
CASE-55	male	6	1.0196	6.955	0.2451	85.34	11.14	7.664
CASE-56	male	6	2.6201	8.9224	0.4396	70.63	24.44	2.89
CASE-57	male	7	1.4357	7.8225	0.4103	81.65	13.11	6.228
CASE-58	male	4	2.9428	7.8425	0.3995	62.48	32.43	1.926
CASE-59	male	6	2.5016	9.3012	0.3374	73.1	23.27	3.142
CASE-60	male	6	1.5269	7.7392	0.3861	80.27	14.74	5.445
CASE-61	male	6	1.1428	7.3071	0.4663	84.36	9.26	9.112
CASE-62	male	5	2.7054	7.2248	0.2828	62.55	33.53	1.866
CASE-63	male	6	1.6703	6.0583	0.386	72.43	21.2	3.417
CASE-64	male	6	1.199	7.198	0.4101	83.34	10.96	7.604
CASE-65	male	6	1.52	8.1604	0.3774	81.37	14	5.812
CASE-66	male	4	3.6365	9.0025	0.3698	59.61	36.29	1.643
CASE-67	male	6	1.6333	7.0571	0.3264	76.86	18.52	4.15
CASE-68	male	6	1.3971	8.702	0.2489	83.95	13.19	6.362
CASE-69	male	6	1.3862	7.4425	0.2609	81.37	15.12	5.382
CASE-70	male	6	2.2715	7.8608	0.3693	71.1	24.2	2.938
CASE-71	male	6	1.4292	8.0894	0.3522	82.33	13.31	6.184
CASE-72	male	4	4.1172	7.6765	0.4078	46.37	48.32	0.96
CASE-73	male	5	3.1808	7.9232	0.2447	59.85	37.06	1.615
CASE-74	male	5	2.3112	5.4672	0.4093	57.73	34.79	1.659
CASE-75	male	6	1.5158	8.5385	0.3609	82.25	13.53	6.081
CASE-76	male	6	1.9255	6.81	0.2624	71.72	24.42	2.937
CASE-77	male	7	1.9976	8.2633	0.3778	75.83	19.6	3.868
CASE-78	male	6	1.8937	6.815	0.3369	72.21	22.84	3.161
CASE-79	male	6	0.9397	8.0485	0.3208	88.32	7.69	11.488
CASE-80	male	4	4.2212	9.9795	0.3773	57.7	38.52	1.498
CASE-81	male	4	2.0958	6.9263	0.3272	69.74	25.53	2.731
CASE-82	male	6	1.8389	5.3725	0.308	65.77	28.49	2.308
CASE-83	male	6	2.1522	8.1766	0.2717	73.68	23	3.204
CASE-84	male	8	1.0296	7.4859	0.3453	86.25	9.14	9.435
CASE-85	male	6	1.1265	6.6118	0.2364	82.96	13.46	6.162
CASE-86	male	6	1.5787	7.8239	0.3441	79.82	15.78	5.059
CASE-87	male	7	1.1314	5.7436	0.3635	80.3	13.37	6.006
CASE-88	male	6	2.2139	9.6021	0.3567	76.94	19.34	3.978
CASE-89	male	4	3.097	8.1083	0.2543	61.8	35.06	1.763
CASE-90	male	4	3.3865	7.7835	0.435	56.49	37.92	1.49
CASE-91	male	5	1.6932	5.4952	0.358	69.19	24.3	2.847
CASE-92	male	5	2.0405	5.6407	0.3076	63.83	30.72	2.078
CASE-93	male	6	1.7449	7.7045	0.267	77.35	19.18	4.032
CASE-94	male	6	1.4289	7.6739	0.3407	81.38	14.18	5.738
CASE-95	male	6	1.2996	6.694	0.2802	80.59	15.23	5.292
CASE-96	male	6	1.3405	6.892	0.3659	80.55	14.14	5.696
CASE-97	male	6	1.2983	7.5045	0.2808	82.7	13.56	6.099
CASE-98	male	6	1.17	7.0214	0.3249	83.34	12.04	6.924
CASE-99	male	6	0.7562	8.119	0.2801	90.69	5.86	15.467
CASE-100	male	6	1.5695	9.0379	0.3843	82.63	13.11	6.302
CASE-101	male	6	2.2356	8.4222	0.454	73.46	21.15	3.473
CASE-102	male	6	0.8661	8.228	0.3165	89.47	6.68	13.394
CASE-103	male	4	3.1463	8.0877	0.3799	61.1	34.2	1.786
CASE-104	male	5	2.3626	8.6056	0.3792	72.55	23.05	3.148
CASE-105	male	5	2.1077	7.1085	0.3281	70.35	25.03	2.81
CASE-106	male	4	3.2217	7.453	0.3838	56.77	38.08	1.491
CASE-107	male	6	1.2443	5.669	0.4103	78.05	14.71	5.305
CASE-108	male	6	1.5825	5.4156	0.6757	70.78	16.74	4.227
CASE-109	male	5	1.8445	6.7648	0.3895	72.73	21.51	3.382
CASE-110	male	4	3.362	8.0517	0.2702	58.24	38.4	1.517
CASE-111	male	5	1.697	5.7701	0.4163	70.59	22.19	3.181
CASE-112	male	6	1.2444	7.8232	0.3354	84.09	11.62	7.238
CASE-113	male	5	2.0941	7.9586	0.3255	73.69	22.22	3.316
CASE-114	male	6	1.5697	10.7444	0.4868	85.39	10.08	8.473
CASE-115	male	5	1.3077	3.8222	0.2582	65.79	27.46	2.396
CASE-116	male	6	1.9419	8.0239	0.3313	75.8	20.07	3.776
CASE-117	male	6	0.9771	4.7788	0.4241	79.55	11.57	6.875
CASE-118	male	4	2.5891	7.9886	0.4038	67.59	27.35	2.471
CASE-119	male	6	1.1841	7.9053	0.3329	85.02	10.77	7.896
CASE-120	male	6	1.1516	7.1316	0.3651	83.85	11.03	7.604
CASE-121	male	6	1.6187	7.5826	0.5287	78.65	14.38	5.471
CASE-122	male	5	2.6399	7.9429	0.2991	66.76	29.47	2.266
CASE-123	male	6	1.4232	7.7917	0.3366	81.73	13.95	5.861
CASE-124	male	6	1.4007	8.0335	0.3158	82.56	13.5	6.114
CASE-125	male	4	3.6434	8.7485	0.3823	58.35	37.28	1.565
CASE-126	male	6	1.3608	6.5585	0.2509	79.25	16.92	4.683
CASE-127	male	6	1.504	4.8859	0.3597	69.22	23.42	2.955
CASE-128	male	7	1.7404	8.228	0.39	78.85	16.41	4.804
CASE-129	male	6	1.1704	4.1157	0.3993	71.56	18.74	3.82
CASE-130	male	5	2.0673	7.0584	0.3415	70.71	24.45	2.892
CASE-131	male	6	1.2749	8.1202	0.3187	84.3	11.78	7.159
CASE-132	male	6	2.126	7.4475	0.323	71.45	24.21	2.951
CASE-133	male	7	1.6698	9.9494	0.4068	83.22	12.69	6.555
CASE-134	male	5	3.3862	8.2195	3.2875	58.8	1.2	48.999
CASE-135	male	6	2.2316	8.2801	0.3702	73.05	22.48	3.25
CASE-136	male	6	2.0032	8.0131	0.3334	75	20.84	3.599
CASE-137	male	6	2.0842	6.8384	0.3471	69.52	25.4	2.737
CASE-138	male	5	3.5955	7.1973	2.9311	50.04	9.23	5.421
CASE-139	male	6	2.1397	7.9707	0.3246	73.16	22.77	3.213
CASE-140	male	7	1.1962	7.2394	0.475	83.48	9.96	8.38
CASE-141	male	4	2.5678	6.6044	0.581	61.12	30.08	2.032
CASE-142	male	5	2.3204	8.9019	0.365	73.93	21.97	3.366
CASE-143	male	5	2.9957	7.8328	0.3263	61.75	34.08	1.812
CASE-144	male	6	2.1405	9.261	0.3514	76.89	19.32	3.98
CASE-145	male	6	2.3138	9.7477	0.4361	76.26	19.26	3.959
CASE-146	male	7	1.1377	7.7208	0.3841	85.26	9.76	8.736
CASE-147	male	6	1.1135	4.7196	0.271	76.41	17.85	4.281
CASE-148	male	6	1.3794	8.3542	0.3501	83.49	12.32	6.776
CASE-149	male	6	1.1082	5.9498	0.3146	81.37	13.34	6.101
CASE-150	male	4	3.1151	8.5903	0.3548	63.74	32.13	1.984
CASE-151	male	6	1.0312	8.1806	0.4826	87.39	6.71	13.031
CASE-152	male	6	1.4462	8.2538	0.4312	82.48	12.3	6.708
CASE-153	male	6	1.9029	8.8488	0.4688	78.49	16.21	4.843
CASE-154	male	6	1.8353	7.2278	0.3623	74.61	20.38	3.661
CASE-155	male	4	3.079	7.2023	0.3163	57.25	38.36	1.492
CASE-156	male	6	1.355	6.3208	0.2746	78.56	17.09	4.596
CASE-157	male	6	1.5266	6.054	0.5507	74.78	16.12	4.64
CASE-158	male	6	1.4635	6.6347	0.3934	77.94	16.13	4.832
CASE-159	male	6	1.7557	8.0519	0.3137	78.19	17.91	4.366
CASE-160	male	8	0.8529	5.9665	0.3021	85.7	9.23	9.284
CASE-161	male	6	1.5014	8.3943	0.3421	82.11	13.81	5.945
CASE-162	male	6	2.5647	8.088	0.3792	68.29	27.02	2.527
CASE-163	male	5	2.3707	7.5185	0.3886	68.47	26.36	2.597
CASE-164	male	6	1.0545	7.2609	0.2748	85.48	10.74	7.961
CASE-165	male	6	1.8704	7.9395	0.2919	76.44	19.88	3.845
CASE-166	male	6	1.5258	5.0581	0.3058	69.83	24.12	2.895
CASE-167	male	6	1.6838	7.8779	0.3024	78.63	17.54	4.484
CASE-168	male	6	1.1123	7.3909	0.3472	84.95	10.35	8.207
CASE-169	male	6	0.9374	7.5287	0.3356	87.55	7.99	10.953
CASE-170	male	5	2.726	7.8833	0.3111	65.42	30.63	2.136
CASE-171	male	6	1.8506	7.3833	0.3228	74.94	20.69	3.621
CASE-172	male	6	1.0963	6.6436	0.2673	83.5	12.48	6.692
CASE-173	male	7	1.2496	8.0512	0.3903	84.48	10.67	7.915
CASE-174	male	4	2.8519	7.1816	0.4232	60.29	33.82	1.783
CASE-175	male	7	1.3787	6.3479	0.3755	78.28	15.8	4.953
CASE-176	male	6	1.2303	4.9798	0.3996	75.29	16.68	4.514
CASE-177	male	7	1.2496	6.4105	0.2853	80.51	15.04	5.352
CASE-178	male	5	2.7207	9.0105	0.3425	69.8	26.39	2.645
CASE-179	male	6	1.4917	7.8053	0.3043	80.89	15.21	5.317
CASE-180	male	4	3.7876	9.1498	0.3691	58.6	37.36	1.569
CASE-181	male	4	4.1072	8.5977	0.3954	52.23	43.17	1.21
CASE-182	male	6	1.2865	9.1283	0.419	85.91	9.5	9.039
CASE-183	male	6	1.5497	5.2943	0.2491	70.73	24.57	2.879
CASE-184	male	6	1.0412	6.3659	0.3757	83.64	10.45	8.001
CASE-185	male	5	2.5292	7.9077	0.274	68.02	28.52	2.385
CASE-186	male	6	1.0657	4.722	0.3681	77.43	14.77	5.241
CASE-187	male	6	2.4668	8.1542	0.3305	69.75	26.2	2.662
CASE-188	male	5	1.9602	6.0652	0.2402	67.68	28.36	2.387
CASE-189	male	4	2.3615	6.2231	0.3142	62.05	32.9	1.886
CASE-190	male	6	1.5016	7.5979	0.3455	80.24	15.22	5.273
CASE-191	male	6	1.1138	8.7433	0.5146	87.26	6.85	12.733
CASE-192	male	4	2.5707	7.6767	0.28	66.51	29.84	2.229
CASE-193	male	5	2.037	6.1135	0.5057	66.68	25.05	2.662
CASE-194	male	4	3.4907	5.7224	3.6367	39	-2.55	-15.29
CASE-195	male	6	1.585	7.7803	0.3325	79.63	16.1	4.946
CASE-196	male	6	1.77	9.1754	0.5454	80.71	13.35	6.048
CASE-197	male	6	1.6724	7.7119	0.3296	78.31	17.41	4.498
CASE-198	male	4	2.6118	6.8243	0.4551	61.73	31.6	1.953
CASE-199	male	6	1.4015	4.8485	0.2915	71.09	22.89	3.106
CASE-200	male	6	1.6654	8.9059	0.2949	81.3	15.39	5.283
CASE-201	male	4	2.7842	6.633	0.8216	58.02	29.59	1.961
CASE-202	male	4	2.4682	7.3915	0.374	66.61	28.33	2.351
CASE-203	male	6	1.3199	7.4948	0.5067	82.39	10.85	7.594
CASE-204	male	6	2.5394	9.9662	0.609	74.52	19.37	3.847
CASE-205	male	6	0.9934	4.923	0.4166	79.82	11.72	6.813
CASE-206	male	4	2.5578	6.9653	0.2428	63.28	33.24	1.904
CASE-207	male	6	1.2998	7.6043	1.0662	82.91	3.07	26.986
CASE-208	male	7	1.6063	6.8972	0.3394	76.71	18.37	4.176
CASE-209	male	4	1.8853	6.0783	0.3328	68.98	25.54	2.701
CASE-210	male	5	1.8149	6.3251	0.3899	71.31	22.53	3.165
CASE-211	male	6	1.5798	6.9713	0.3675	77.34	17.39	4.447
CASE-212	male	6	1.6507	8.5481	0.4475	80.69	14.08	5.733
CASE-213	male	7	1.5332	7.8206	0.3098	80.4	15.64	5.139
CASE-214	male	6	1.2346	5.0029	0.3774	75.32	17.13	4.396
CASE-215	male	6	1.45	6.8409	0.2952	78.8	16.88	4.668
CASE-216	male	5	2.8738	9.284	0.5211	69.05	25.34	2.725
CASE-217	male	6	2.4412	9.0067	0.3737	72.9	22.96	3.176
CASE-218	male	6	1.2502	8.0366	0.3925	84.44	10.67	7.912
CASE-219	male	5	2.2495	7.6364	0.2667	70.54	25.96	2.717
CASE-220	male	5	2.6204	6.7167	0.3394	60.99	33.96	1.796
CASE-221	male	6	1.3531	7.6395	0.3247	82.29	13.46	6.113
CASE-222	male	7	1.1236	5.4377	0.2627	79.34	15.83	5.011
CASE-223	male	4	2.5475	6.5297	1.2717	60.99	19.54	3.122
CASE-224	male	6	1.2558	7.8653	0.2844	84.03	12.35	6.804
CASE-225	male	6	1.2631	6.6696	0.332	81.06	13.96	5.807
CASE-226	male	5	2.2506	7.4248	0.3331	69.69	25.83	2.698
CASE-227	male	7	1.251	6.4302	0.231	80.55	15.86	5.078
CASE-228	male	7	1.1811	7.7966	0.316	84.85	11.09	7.648
CASE-229	male	5	2.6961	5.7805	3.0238	53.36	-5.67	-9.411
CASE-230	female	6	1.1999	4.648	0.1923	74.19	21.68	3.422
CASE-231	female	4	2.311	7.5083	0.2733	69.22	27.14	2.55
CASE-232	female	7	1.2021	7.3117	0.2397	83.56	13.16	6.348
CASE-233	female	4	2.6033	7.1516	0.2452	63.6	32.97	1.929
CASE-234	female	6	1.5095	4.4094	0.2475	65.77	28.62	2.298
CASE-235	female	4	2.4221	7.7881	0.3451	68.9	26.67	2.583
CASE-236	female	6	1.6489	7.2778	0.3171	77.34	18.3	4.226
CASE-237	female	6	1.2329	4.9149	0.25	74.91	20	3.746
CASE-238	female	7	0.9039	5.8835	0.3137	84.64	10.03	8.437
CASE-239	female	4	2.8076	7.8301	0.2827	64.14	32.25	1.989
CASE-240	female	6	1.5148	7.9611	0.3265	80.97	14.93	5.425
CASE-241	female	8	0.8174	4.209	0.3044	80.58	12.19	6.611
CASE-242	female	6	0.7271	5.7921	0.2861	87.45	7.62	11.483
CASE-243	female	4	2.322	7.2521	0.3443	67.98	27.27	2.493
CASE-244	female	7	0.9754	6.71	0.2049	85.46	11.48	7.444
CASE-245	female	7	1.1308	7.5959	0.3366	85.11	10.46	8.14
CASE-246	female	7	1.5172	7.2299	0.3201	79.02	16.56	4.772
CASE-247	female	5	2.3785	6.9208	0.3423	65.63	29.42	2.231
CASE-248	female	4	2.4878	6.4125	0.2705	61.2	34.58	1.77
CASE-249	female	4	1.9704	5.6288	0.3023	64.99	29.63	2.193
CASE-250	female	6	1.1042	6.753	0.2727	83.65	12.31	6.793
CASE-251	female	4	2.3625	6.7049	0.3004	64.76	30.76	2.106
CASE-252	female	4	3.5134	7.6073	0.2667	53.82	42.68	1.261
CASE-253	female	7	0.8873	6.3684	0.2627	86.07	9.81	8.776
CASE-254	female	4	2.8499	6.834	0.3034	58.3	37.26	1.565
CASE-255	female	6	1.181	6.2154	0.2401	81	15.14	5.35
CASE-256	female	6	1.4163	7.047	0.2986	79.9	15.86	5.038
CASE-257	female	4	2.565	7.3838	0.2791	65.26	30.96	2.108
CASE-258	female	5	2.3903	5.9854	0.3005	60.06	34.91	1.72
CASE-259	female	6	1.0263	6.9954	0.2737	85.33	10.76	7.932
CASE-260	female	4	3.5641	7.4041	0.2743	51.86	44.43	1.167
CASE-261	female	7	1.8493	8.0264	0.3687	76.96	18.45	4.172
CASE-262	female	4	2.5969	6.4083	0.2472	59.48	36.67	1.622
CASE-263	female	5	1.8461	5.843	0.212	68.4	27.97	2.446
CASE-264	female	6	1.5941	6.6087	0.3481	75.88	18.85	4.024
CASE-265	female	4	3.2978	7.4658	0.3092	55.83	40.03	1.395
CASE-266	female	5	2.0467	5.5294	0.2862	62.99	31.84	1.978
CASE-267	female	6	1.6703	6.1483	0.2923	72.83	22.41	3.249
CASE-268	female	6	1.9571	7.4043	0.2811	73.57	22.64	3.25
CASE-269	female	6	1.7847	6.3879	0.311	72.06	23.07	3.123
CASE-270	female	6	1.2849	7.1394	0.267	82	14.26	5.751
CASE-271	female	6	1.1084	4.9876	0.3493	77.78	15.22	5.111
CASE-272	female	7	0.7551	5.7463	0.241	86.86	8.95	9.708
CASE-273	female	7	0.946	6.4161	0.2767	85.26	10.43	8.173
CASE-274	female	5	1.7535	5.3828	0.264	67.42	27.67	2.436
CASE-275	female	5	1.8158	5.8214	0.2428	68.81	27.02	2.546
CASE-276	female	6	2.106	7.8404	0.3131	73.14	22.87	3.198
CASE-277	female	6	1.7609	6.0698	0.3057	70.99	23.97	2.961
CASE-278	female	5	2.3804	5.6399	0.3253	57.79	36.44	1.586
CASE-279	female	6	1.4849	4.9939	0.313	70.27	23.47	2.994
CASE-280	female	6	1.2215	6.984	0.3163	82.51	12.96	6.366
CASE-281	female	4	2.6029	7.6282	0.3097	65.88	30.06	2.191
CASE-282	female	6	1.7821	7.6606	0.247	76.74	20.04	3.829
CASE-283	female	5	2.4316	7.7745	0.3175	68.72	27.19	2.527
CASE-284	female	6	1.4626	7.646	0.2944	80.87	15.28	5.293
CASE-285	female	5	1.177	5.4138	0.3049	78.26	16.11	4.858
CASE-286	female	7	1.2567	6.8988	0.3422	81.78	13.26	6.169
CASE-287	female	6	1.4155	7.1882	0.2952	80.31	15.59	5.153
CASE-288	female	7	1.6588	6.6004	0.3676	74.87	19.56	3.827
CASE-289	female	5	1.3275	6.2198	0.2779	78.66	16.88	4.661
CASE-290	female	4	2.551	7.4319	0.2454	65.67	31.02	2.117
CASE-291	female	5	1.9436	5.1076	0.2838	61.95	32.5	1.906
CASE-292	female	5	1.7547	5.3183	0.2257	67.01	28.75	2.331
CASE-293	female	4	2.3684	7.4824	0.2986	68.35	27.66	2.471
CASE-294	female	4	2.8976	7.3886	0.2586	60.78	35.72	1.702
CASE-295	female	6	1.9897	7.1497	0.2695	72.17	24.06	3
CASE-296	female	8	1.0531	8.6578	0.3422	87.84	8.21	10.698
CASE-297	female	4	2.4431	6.8949	0.3318	64.57	30.62	2.109
CASE-298	female	6	2.0807	5.0063	0.3326	58.44	34.92	1.674
CASE-299	female	5	1.9915	7.1612	0.2953	72.19	23.69	3.048
CASE-300	female	6	1.9629	6.5339	0.2723	69.96	25.87	2.704
CASE-301	female	5	1.5369	6.4883	0.2497	76.31	19.84	3.847
CASE-302	female	5	2.0734	6.4738	0.4011	67.97	25.83	2.631
CASE-303	female	6	1.671	6.8346	0.341	75.55	19.46	3.882
CASE-304	female	6	2.1396	8.0845	0.2718	73.53	23.1	3.183
CASE-305	female	6	1.0474	6.0718	0.3999	82.75	10.66	7.76
CASE-306	female	5	2.035	5.9015	0.3023	65.52	29.36	2.232
CASE-307	female	6	1.2926	7.8375	0.3838	83.51	11.6	7.201
CASE-308	female	5	1.4408	6.0958	0.412	76.36	16.88	4.525
CASE-309	female	5	1.7939	6.0478	0.4152	70.34	22.8	3.086
CASE-310	female	6	1.8055	6.2344	0.2355	71.04	25.18	2.821
CASE-311	female	6	2.0504	7.894	0.2486	74.03	22.83	3.243
CASE-312	female	8	0.8225	6.229	0.2345	86.8	9.44	9.195
CASE-313	female	7	1.62	7.5801	0.3303	78.63	17.01	4.622
CASE-314	female	4	2.3977	6.7733	0.3862	64.6	29.7	2.175
CASE-315	female	6	1.839	6.3924	0.3054	71.23	23.99	2.969
CASE-316	female	7	1.2799	7.9763	0.3325	83.95	11.88	7.068
CASE-317	female	5	1.4912	6.2504	0.2464	76.14	19.92	3.823
CASE-318	female	7	1.096	7.3766	0.2957	85.14	10.85	7.848
CASE-319	female	4	2.7898	7.0231	0.2751	60.28	35.81	1.683
CASE-320	female	7	1.0789	5.8128	0.2664	81.44	13.98	5.827
CASE-321	female	5	1.41	6.2691	0.2252	77.51	18.9	4.101
CASE-322	female	5	1.5412	3.9221	0.2599	60.7	32.67	1.858
CASE-323	female	6	1.3335	6.3793	0.2403	79.1	17.14	4.616
CASE-324	female	5	2.1444	6.0674	0.3668	64.66	29.3	2.207
CASE-325	female	6	0.7651	6.9043	0.1983	88.92	8.21	10.832
CASE-326	female	4	2.887	7.6225	0.3473	62.13	33.32	1.865
CASE-327	female	6	1.1653	6.0351	0.3265	80.69	13.9	5.806
CASE-328	female	5	1.7645	5.5404	0.294	68.15	26.54	2.568
CASE-329	female	6	0.9117	7.0142	0.2655	87	9.21	9.444
CASE-330	female	7	0.8294	5.1666	0.3012	83.95	10.22	8.211
CASE-331	female	4	2.3665	7.4713	0.3699	68.33	26.72	2.557
CASE-332	female	6	0.9955	3.7928	0.2587	73.75	19.43	3.796
CASE-333	female	6	1.2321	7.2031	0.3124	82.9	12.77	6.493
CASE-334	female	6	1.3824	4.4916	0.2739	69.22	24.68	2.805
CASE-335	female	5	1.6122	6.971	0.2556	76.87	19.46	3.95
CASE-336	female	7	1.2297	7.6551	0.3224	83.94	11.85	7.082
CASE-337	female	4	3.2858	7.3838	0.2793	55.5	40.72	1.363
CASE-338	female	4	1.8946	6.1479	0.2446	69.18	26.84	2.578
CASE-339	female	6	0.9844	5.1887	0.3221	81.03	12.77	6.348
CASE-340	female	5	2.0252	6.5166	0.2853	68.92	26.7	2.581
CASE-341	female	5	1.5819	5.8723	0.3191	73.06	21.51	3.397
CASE-342	female	4	2.5898	6.2846	0.3236	58.79	36.06	1.63
CASE-343	female	6	1.8921	7.9366	0.3365	76.16	19.6	3.886
CASE-344	female	5	1.716	5.1488	0.2554	66.67	28.37	2.35
CASE-345	female	5	1.9899	6.6491	0.2774	70.07	25.75	2.721
CASE-346	female	4	2.4684	7.299	0.3909	66.18	28.46	2.325
CASE-347	female	5	1.994	6.2768	0.3241	68.23	26.6	2.565
CASE-348	female	5	2.143	7.2366	0.2756	70.39	25.81	2.728
CASE-349	female	4	1.8198	6.0867	0.3704	70.1	23.81	2.944
CASE-350	female	7	1.1109	4.1432	0.457	73.19	15.78	4.637
CASE-351	female	6	1.3873	7.3353	0.2452	81.09	15.57	5.208
CASE-352	female	4	2.55	5.7999	0.306	56.03	38.69	1.448
CASE-353	female	6	0.8551	7.5326	0.28	88.65	7.63	11.611
CASE-354	female	6	1.0857	6.5171	0.2712	83.34	12.5	6.668
CASE-355	female	6	1.104	5.9936	0.2274	81.58	14.63	5.577
CASE-356	female	6	1.3255	6.6901	0.2559	80.19	15.99	5.016
CASE-357	female	7	1.5781	7.3484	0.323	78.52	17.08	4.597
CASE-358	female	6	1.333	6.1868	0.2306	78.45	17.82	4.403
CASE-359	female	5	3.0142	8.1374	0.3112	62.96	33.22	1.895
CASE-360	female	4	1.9875	7.4213	0.2627	73.22	23.24	3.15
CASE-361	female	6	1.3013	8.1292	0.2727	83.99	12.65	6.638
CASE-362	female	7	1.4994	7.9446	0.3051	81.13	15.03	5.397
CASE-363	female	6	1.8133	7.3899	0.3471	75.46	19.84	3.803
CASE-364	female	5	1.8334	5.0785	0.3081	63.9	30.04	2.127
CASE-365	female	5	1.49	4.3456	0.261	65.71	28.28	2.323
CASE-366	female	5	2.3897	7.7102	0.2831	69.01	27.32	2.526
CASE-367	female	6	0.9271	6.6429	0.3777	86.04	8.27	10.405
CASE-368	female	5	1.7323	5.6655	0.3518	69.42	24.37	2.849
CASE-369	female	6	1.604	6.359	0.2769	74.78	20.87	3.583
CASE-370	female	5	2.1405	7.9766	0.3279	73.17	22.72	3.22
CASE-371	female	6	1.5195	6.0303	0.3424	74.8	19.52	3.832
CASE-372	female	7	1.4036	5.5833	0.2447	74.86	20.76	3.607
CASE-373	female	6	2.6443	6.7598	2.5288	60.88	1.71	35.649
CASE-374	female	6	1.4281	6.5038	0.3428	78.04	16.69	4.676
CASE-375	female	6	1.0668	7.0761	0.4133	84.92	9.24	9.194
CASE-376	female	6	1.2245	4.5724	0.3751	73.22	18.58	3.941
CASE-377	female	6	1.5232	6.5376	0.2625	76.7	19.28	3.977
CASE-378	female	6	0.8988	6.1902	0.4344	85.48	7.5	11.396
CASE-379	female	6	1.0793	7.3228	0.2769	85.26	10.96	7.781
CASE-380	female	6	1.5752	8.1208	0.3426	80.6	15.18	5.31
CASE-381	female	5	1.7964	5.1625	0.3316	65.2	28.37	2.298
CASE-382	female	4	3.1733	7.3869	0.5665	57.04	35.29	1.616
CASE-383	female	6	2.1575	7.1576	0.2823	69.86	26.2	2.666
CASE-384	female	5	1.5128	4.4478	0.2408	65.99	28.6	2.307
CASE-385	female	7	0.9999	6.3474	0.3687	84.25	9.94	8.472
CASE-386	female	6	1.2183	3.5847	0.3537	66.01	24.12	2.737
CASE-387	female	6	1.2704	6.2223	0.3035	79.58	15.54	5.121
CASE-388	female	6	1.8525	6.9856	0.272	73.48	22.62	3.248
CASE-389	female	6	1.1352	7.4517	0.2354	84.77	12.08	7.02
CASE-390	female	6	0.8565	5.9698	0.21	85.65	10.83	7.909
CASE-391	female	6	1.5379	6.8175	0.3482	77.44	17.45	4.438
CASE-392	female	6	1.4089	7.2795	0.2378	80.65	16.09	5.013
CASE-393	female	6	1.2787	7.1068	0.373	82.01	12.74	6.435
CASE-394	female	6	1.5524	6.3083	0.3002	75.39	19.85	3.798
CASE-395	female	5	1.9396	6.6069	0.5269	70.64	21.38	3.304
CASE-396	female	4	2.098	6.551	0.2727	67.97	27.86	2.44
CASE-397	female	4	3.3146	7.6128	0.2889	56.46	39.74	1.421
CASE-398	female	6	1.2986	6.2821	0.2357	79.33	16.92	4.689
CASE-399	female	7	1.5532	8.2631	0.2627	81.2	15.62	5.2
CASE-400	female	4	2.5921	7.5104	0.3392	65.49	30	2.183
CASE-401	female	6	1.1035	7.4599	0.4479	85.21	8.79	9.695
CASE-402	female	6	1.4534	7.4813	0.379	80.57	14.36	5.61
CASE-403	female	6	1.5206	7.1217	0.2903	78.65	17.28	4.552
CASE-404	female	6	1.6831	8.0797	0.3078	79.17	17.02	4.651
CASE-405	female	6	1.6918	6.9429	0.3414	75.63	19.45	3.889
CASE-406	female	5	2.1311	7.2609	0.3603	70.65	24.39	2.897
CASE-407	female	6	1.2706	6.7732	0.3004	81.24	14.32	5.672
CASE-408	female	6	1.4934	6.877	0.2861	78.28	17.56	4.459
CASE-409	female	4	2.3351	6.0295	0.269	61.27	34.27	1.788
CASE-410	female	6	1.6896	7.6154	0.3206	77.81	17.98	4.328
CASE-411	female	4	2.3977	5.9456	0.2527	59.67	36.08	1.654
CASE-412	female	4	3.0788	6.9988	0.3383	56.01	39.16	1.43
CASE-413	female	4	2.3327	5.3842	0.3103	56.68	37.56	1.509
CASE-414	female	5	1.4757	6.2341	0.2791	76.33	19.19	3.977
CASE-415	female	6	1.8726	7.3408	0.3974	74.49	20.1	3.707
CASE-416	female	6	1.368	7.1514	0.3382	80.87	14.4	5.616
CASE-417	female	6	1.9021	6.9758	0.2355	72.73	23.89	3.044
CASE-418	female	7	0.8257	5.3457	0.3215	84.55	9.43	8.965
CASE-419	female	5	1.6426	5.711	0.3709	71.24	22.27	3.199
CASE-420	female	6	1.2218	6.8995	0.3028	82.29	13.32	6.178
CASE-421	female	6	2.6344	8.7589	0.3859	69.92	25.67	2.724
CASE-422	female	7	0.9872	6.5691	0.2318	84.97	11.5	7.389
CASE-423	female	6	1.7785	6.2711	0.329	71.64	23.11	3.099
CASE-424	female	6	1.317	6.1379	0.3023	78.54	16.53	4.751
CASE-425	female	4	2.4219	7.3637	0.4622	67.11	26.61	2.522
CASE-426	female	4	3.3626	7.631	0.3299	55.94	39.74	1.407
CASE-427	female	6	1.2763	7.3016	0.3421	82.52	12.79	6.45
CASE-428	female	6	2.0517	6.4884	0.2927	68.38	27.11	2.522
CASE-429	female	5	2.8674	8.1262	0.4363	64.71	29.92	2.163
CASE-430	female	4	1.9697	4.9848	0.3536	60.49	32.42	1.866
CASE-431	female	6	0.9652	6.82	0.3188	85.85	9.48	9.058
CASE-432	female	4	2.7676	7.0362	0.2471	60.67	35.82	1.693
CASE-433	female	4	2.3724	6.5856	0.2936	63.98	31.57	2.027
CASE-434	female	4	2.6743	6.7889	0.2179	60.61	36.18	1.675
CASE-435	female	7	1.2719	6.3862	0.3421	80.08	14.56	5.501
CASE-436	female	6	1.032	4.6335	0.2825	77.73	16.18	4.805
CASE-437	female	6	1.4209	6.0405	1.425	76.48	-0.07	-1130.86
CASE-438	female	6	1.4794	7.3749	0.3583	79.94	15.2	5.259
CASE-439	female	4	2.3996	6.6039	0.2315	63.66	32.83	1.939
CASE-440	female	6	1.171	7.2998	0.2745	83.96	12.28	6.836
CASE-441	female	6	1.191	6.6346	0.3448	82.05	12.75	6.433
CASE-442	female	5	2.9512	7.8392	0.4127	62.35	32.38	1.926
CASE-443	female	5	2.6829	6.3452	0.2389	57.72	38.52	1.498
CASE-444	female	6	1.3043	7.2723	0.2888	82.07	13.96	5.877
CASE-445	female	6	1.2218	5.9979	0.3968	79.63	13.75	5.79
CASE-446	female	6	1.1215	4.9209	0.2671	77.21	17.36	4.447
CASE-447	female	6	1.5055	4.711	0.3153	68.04	25.27	2.693
CASE-448	female	6	1.6753	8.0502	0.442	79.19	15.32	5.169
CASE-449	female	5	1.9891	4.7217	0.2674	57.87	36.47	1.587
CASE-450	female	6	1.657	6.8303	0.3064	75.74	19.77	3.83
CASE-451	female	6	1.5884	6.67	0.3205	76.19	19.01	4.008
CASE-452	female	6	1.3326	7.3485	0.3665	81.87	13.15	6.227
CASE-453	female	4	1.743	5.4998	0.3875	68.31	24.65	2.772
CASE-454	female	6	1.3605	7.2469	0.4401	81.23	12.7	6.395
CASE-455	female	5	2.2956	7.3095	0.2756	68.59	27.63	2.482
CASE-456	female	7	1.0377	5.2599	0.2996	80.27	14.03	5.72
CASE-457	female	6	1.0541	6.313	0.3253	83.3	11.54	7.216
CASE-458	female	6	1.3313	6.9705	0.3013	80.9	14.78	5.475
CASE-459	female	6	1.3642	4.5222	0.2652	69.83	24.3	2.874
CASE-460	female	5	1.9456	4.9587	0.3259	60.76	32.66	1.86
CASE-461	female	5	1.3953	6.3293	0.3635	77.95	16.3	4.782
CASE-462	female	4	2.3489	6.5082	0.2297	63.91	32.56	1.963
CASE-463	female	5	1.7699	6.3817	0.3019	72.27	23	3.142
CASE-464	female	6	1.392	7.8934	0.4889	82.37	11.44	7.199
CASE-465	female	4	1.6628	6.5227	0.2563	74.51	21.56	3.456
CASE-466	female	7	1.1212	4.6642	0.4166	75.96	15.11	5.029
CASE-467	female	6	0.712	5.7295	0.3315	87.57	6.64	13.186
