# Supplementary material
Source: Research Square preprint supplement (doi:10.21203/rs.3.rs-8928788/v1)
Supplement: Supplementary file 4 [file 852bcbbaf1e1e51dd7ea30c2.xlsx]

## Sheet: Sayfa1
Feature Set	Classifier	Accuracy (%)	SD (%)	Sensitivity (%)	Specificity (%)
S4_FS_Shape	LDA	80.9	4.9	76.4	85.3
S5_FS_Combined	LDA	80.5	6.8	75.1	85.7
S6_FS_All	LDA	80.5	6.8	75.1	85.7
S5_FS_Combined	SVM_linear	78.8	6	75.1	82.4
S6_FS_All	SVM_linear	78.8	6	75.1	82.4
S4_FS_Shape	SVM_linear	77.7	7.4	74.2	81.1
S1_Size	SVM_rbf	77.3	7	72.5	81.9
S2_Shape	RF	77.1	7.2	76.9	77.3
S5_FS_Combined	RF	76.4	6.1	73.4	79.4
S6_FS_All	RF	76.4	6.1	73.4	79.4
S4_FS_Shape	SVM_rbf	76.2	7.6	70.7	81.5
S1_Size	SVM_linear	76	6.2	72.1	79.8
S1_Size	LDA	75.6	5.7	72.1	79
S5_FS_Combined	SVM_rbf	74.9	5.3	71.2	78.6
S6_FS_All	SVM_rbf	74.9	5.3	71.2	78.6
S1_Size	RF	74.9	4.8	71.6	78.2
S3_Combined	RF	74.7	6.5	72.9	76.5
S3_Combined	SVM_rbf	74.1	5	72.9	75.2
S4_FS_Shape	RF	73.8	6.6	72.5	75.2
S3_Combined	SVM_linear	73.4	5.1	70.7	76.1
S2_Shape	SVM_linear	73.2	5.8	71.2	75.2
S2_Shape	SVM_rbf	72.8	6.2	73.8	71.8
S2_Shape	LDA	67.9	9.7	65.1	70.6
S3_Combined	LDA	66.6	9.4	63.8	69.3
S8_HM_KDE	Overlap_bw9	54.1	7.1	70.5	38.1
S7_HM_Point	Density_CV	50.3	3.2	96.2	5.4
