# Supplementary material
Source: Research Square preprint supplement (doi:10.21203/rs.3.rs-8928788/v1)
Supplement: Supplementary file 5 [file ab6aafc602de6af68869e989.xlsx]

## Sheet: Sayfa1
Rank	Feature	Male Mean	Male SD	Female Mean	Female SD	U Statistic	p-value	p (Bonferroni)	Cohen's d	|Cohen's d|	Significant
1	poly10_poly_area_mm2	792.974	149.355	633.013	94.5104	45743	7.31e-37	1.71e-34	1.2852	1.2852	Yes
2	poly12_poly_area_mm2	809.108	151.614	646.701	96.0386	45715	9.34e-37	2.19e-34	1.2851	1.2851	Yes
3	perimeter_mm	107.125	11.1603	95.0185	7.35653	47498	1.86e-39	4.36e-37	1.2836	1.2836	Yes
4	fitz_ellipse_area_mm2	842.018	158.242	673.799	99.2862	45585	2.90e-36	6.78e-34	1.2789	1.2789	Yes
5	poly13_poly_area_mm2	814.327	152.911	651.457	96.8504	45614	2.25e-36	5.27e-34	1.2778	1.2778	Yes
6	poly9_poly_area_mm2	777.192	146.469	621.482	92.4368	45577	3.11e-36	7.27e-34	1.2767	1.2767	Yes
7	poly11_poly_area_mm2	801.623	151.34	641.137	95.729	45564	3.48e-36	8.14e-34	1.2727	1.2727	Yes
8	poly8_poly_area_mm2	757.184	144.35	604.897	90.4038	45675	1.33e-36	3.10e-34	1.2698	1.2698	Yes
9	circle_circle_area_mm2	841.244	158.525	673.981	99.6536	45546	4.07e-36	9.51e-34	1.2686	1.2686	Yes
10	fitz_fm_area_mm2	831.811	157.8	665.475	99.1787	45467	8.05e-36	1.88e-33	1.2675	1.2675	Yes
11	outer_fm_area_mm2	831.811	157.8	665.475	99.1787	45467	8.05e-36	1.88e-33	1.2675	1.2675	Yes
12	inner_fm_area_mm2	831.811	157.8	665.475	99.1787	45467	8.05e-36	1.88e-33	1.2675	1.2675	Yes
13	circle_fm_area_mm2	831.811	157.8	665.475	99.1787	45467	8.05e-36	1.88e-33	1.2675	1.2675	Yes
14	poly7_poly_area_mm2	727.385	140.958	580.169	86.7645	45595	2.66e-36	6.22e-34	1.2633	1.2633	Yes
15	radial_mean_mm	16.2251	1.52595	14.5573	1.08738	46506	1.01e-35	2.37e-33	1.261	1.261	Yes
16	max_diameter_mm	36.8581	3.39869	33.0481	2.62405	46253	8.47e-35	1.98e-32	1.2566	1.2566	Yes
17	area_mm2	830.069	159.872	665.316	99.0012	46488	1.18e-35	2.76e-33	1.242	1.242	Yes
18	poly6_poly_area_mm2	697.011	140.74	553.074	86.7712	45166	1.06e-34	2.47e-32	1.2365	1.2365	Yes
19	ap_diameter_mm	36.5267	3.47946	32.6813	2.76693	45788	3.89e-33	9.10e-31	1.2248	1.2248	Yes
20	poly4_poly_area_mm2	540.441	108.467	434.688	70.8132	43988	1.67e-30	3.91e-28	1.1591	1.1591	Yes
21	min_diameter_mm	31.3474	3.15542	28.1886	2.29037	45046	1.43e-30	3.33e-28	1.1476	1.1476	Yes
22	poly5_poly_area_mm2	612.249	126.424	491.369	83.3843	43866	4.38e-30	1.03e-27	1.1331	1.1331	Yes
23	transverse_diameter_mm	31.3508	3.15752	28.2261	2.30639	44876	5.32e-30	1.25e-27	1.132	1.132	Yes
24	area_perimeter_ratio	7.70223	0.846505	6.96639	0.553777	44615	3.93e-29	9.19e-27	1.0309	1.0309	Yes
25	eft_total_power	3965.56	914.509	3231.05	802.277	39749	1.02e-17	2.38e-15	0.8549	0.8549	Yes
26	circle_r	44.2545	5.23731	39.8876	5.04506	39803	7.36e-18	1.72e-15	0.8496	0.8496	Yes
27	fitz_b	40.9629	5.15148	36.7951	4.92301	39397	8.04e-17	1.88e-14	0.8275	0.8275	Yes
28	fitz_a	47.9209	5.78772	43.2817	5.55726	39271	1.66e-16	3.89e-14	0.818	0.818	Yes
29	poly3_rmse_mm	7.4416	1.19739	6.57157	1.00216	39326	1.21e-16	2.84e-14	0.7893	0.7893	Yes
30	poly3_max_dist_mm	13.8905	2.25672	12.2364	1.99979	39483	4.88e-17	1.14e-14	0.7767	0.7767	Yes
31	poly3_poly_area_mm2	283.803	86.1717	227.809	63.0246	38498	1.22e-14	2.85e-12	0.7439	0.7439	Yes
32	poly3_mean_dist_mm	6.04488	0.980741	5.37928	0.815997	37972	1.94e-13	4.53e-11	0.7391	0.7391	Yes
33	poly3_std_dist_mm	4.31259	0.843444	3.74954	0.727387	38941	1.08e-15	2.52e-13	0.7159	0.7159	Yes
34	hm_diff	0.043898	0.01589	0.032993	0.0155	38500	1.35e-12	3.16e-10	0.6948	0.6948	Yes
35	n_points	93.9487	31.8757	77.318	14.0936	35328	7.19e-07	1.68e-04	0.6773	0.6773	Yes
36	poly4_rmse_mm	3.71451	0.782789	3.23801	0.701232	36400	3.50e-10	8.18e-08	0.6419	0.6419	Yes
37	poly4_mean_dist_mm	2.98339	0.608304	2.62269	0.51913	36350	4.36e-10	1.02e-07	0.6388	0.6388	Yes
38	poly4_max_dist_mm	7.28779	1.60055	6.35183	1.46148	35899	3.00e-09	7.03e-07	0.6112	0.6112	Yes
39	poly4_std_dist_mm	2.20392	0.531629	1.88751	0.515662	36128	1.14e-09	2.67e-07	0.6043	0.6043	Yes
40	poly9_mean_dist_mm	0.622962	0.208039	0.523475	0.123457	37301	5.46e-12	1.28e-09	0.5843	0.5843	Yes
41	poly7_rmse_mm	1.39886	0.367737	1.21203	0.284556	36073	1.44e-09	3.38e-07	0.5696	0.5696	Yes
42	poly7_std_dist_mm	0.877429	0.27727	0.740742	0.203481	36370	3.99e-10	9.34e-08	0.5637	0.5637	Yes
43	poly5_max_dist_mm	5.88376	1.47606	5.06574	1.43807	35946	2.47e-09	5.77e-07	0.5615	0.5615	Yes
44	poly5_std_dist_mm	1.74259	0.489415	1.47574	0.477892	35849	3.70e-09	8.66e-07	0.5518	0.5518	Yes
45	poly8_mean_dist_mm	0.798855	0.229865	0.693242	0.151416	35600	1.03e-08	2.40e-06	0.5447	0.5447	Yes
46	poly7_mean_dist_mm	1.08484	0.2616	0.956037	0.214275	35100	7.31e-08	1.71e-05	0.5397	0.5397	Yes
47	poly9_rmse_mm	0.819542	0.336612	0.673987	0.184006	38028	1.45e-13	3.39e-11	0.5394	0.5394	Yes
48	poly5_rmse_mm	2.84154	0.729895	2.45976	0.690154	35896	3.04e-09	7.12e-07	0.5378	0.5378	Yes
49	poly8_rmse_mm	1.03644	0.34235	0.889329	0.210879	35892	3.09e-09	7.24e-07	0.5197	0.5197	Yes
50	poly5_mean_dist_mm	2.2369	0.572163	1.96124	0.523657	35298	3.41e-08	7.97e-06	0.5031	0.5031	Yes
51	poly9_std_dist_mm	0.527954	0.273643	0.422097	0.14385	38150	7.70e-14	1.80e-11	0.4869	0.4869	Yes
52	poly7_max_dist_mm	3.22381	1.16948	2.74502	0.773719	35722	6.25e-09	1.46e-06	0.4847	0.4847	Yes
53	poly11_mean_dist_mm	0.407213	0.196776	0.334163	0.088978	38162	7.24e-14	1.69e-11	0.4815	0.4815	Yes
54	outer_std_dist_mm	8.96306	2.55184	7.77453	2.40473	34945	1.31e-07	3.07e-05	0.4796	0.4796	Yes
55	poly8_std_dist_mm	0.655239	0.266636	0.55371	0.159017	35318	3.15e-08	7.37e-06	0.4646	0.4646	Yes
56	poly10_mean_dist_mm	0.484266	0.197578	0.412246	0.107039	35792	4.69e-09	1.10e-06	0.4557	0.4557	Yes
57	circle_cx	776.61	57.3421	751.265	60.3317	33570	1.47e-05	3.43e-03	0.4304	0.4304	Yes
58	fitz_cx	776.576	57.3376	751.238	60.327	33569	1.47e-05	3.44e-03	0.4303	0.4303	Yes
59	circle_cy	487.743	39.6017	469.972	44.7351	33378	2.64e-05	6.19e-03	0.4202	0.4202	Yes
60	fitz_cy	487.682	39.6271	469.964	44.7435	33361	2.78e-05	6.51e-03	0.4188	0.4188	Yes
61	poly9_max_dist_mm	2.0501	1.24041	1.64385	0.633854	37467	2.44e-12	5.70e-10	0.4148	0.4148	Yes
62	poly12_mean_dist_mm	0.341661	0.196459	0.278858	0.089407	38039	1.37e-13	3.21e-11	0.4141	0.4141	Yes
63	poly13_mean_dist_mm	0.300166	0.19519	0.239156	0.082723	39099	4.43e-16	1.04e-13	0.4098	0.4098	Yes
64	poly6_max_dist_mm	3.9117	1.34594	3.42449	1.03546	33165	4.99e-05	1.17e-02	0.4068	0.4068	Yes
65	poly10_rmse_mm	0.648145	0.351212	0.537628	0.172352	36285	5.79e-10	1.35e-07	0.4019	0.4019	Yes
66	poly6_std_dist_mm	1.10051	0.386384	0.959756	0.317661	32697	1.88e-04	4.39e-02	0.3987	0.3987	Yes
67	poly11_rmse_mm	0.549942	0.361417	0.441262	0.167647	38583	7.71e-15	1.80e-12	0.3882	0.3882	Yes
68	poly6_rmse_mm	1.77363	0.547847	1.58632	0.442135	32335	4.89e-04	1.14e-01	0.377	0.377	No
69	poly8_max_dist_mm	2.46999	1.18443	2.12124	0.65899	34061	3.00e-06	7.03e-04	0.3658	0.3658	Yes
70	poly10_std_dist_mm	0.426108	0.297222	0.343114	0.140083	36405	3.42e-10	8.00e-08	0.3594	0.3594	Yes
71	inner_std_dist_mm	2.30565	0.652071	2.05481	0.778672	34050	3.11e-06	7.29e-04	0.3487	0.3487	Yes
72	poly6_mean_dist_mm	1.38569	0.406719	1.25766	0.328946	31928	1.34e-03	3.13e-01	0.3468	0.3468	No
73	poly12_rmse_mm	0.471106	0.375737	0.370783	0.169803	38742	3.24e-15	7.58e-13	0.3463	0.3463	Yes
74	poly13_rmse_mm	0.421493	0.391565	0.32198	0.171095	39624	2.13e-17	4.99e-15	0.3315	0.3315	Yes
75	poly11_std_dist_mm	0.365129	0.308563	0.285714	0.147001	38431	1.75e-14	4.09e-12	0.3306	0.3306	Yes
76	poly10_max_dist_mm	1.71018	1.32218	1.37851	0.626532	36362	4.13e-10	9.67e-08	0.3226	0.3226	Yes
77	outer_cy	504.148	120.303	459.904	151.928	34288	1.39e-06	3.25e-04	0.3222	0.3222	Yes
78	fitz_mean_dist_mm	0.613843	0.252647	0.548724	0.149671	31249	6.11e-03	1.00e+00	0.3151	0.3151	No
79	poly11_max_dist_mm	1.50894	1.35262	1.17668	0.650992	37200	8.87e-12	2.08e-09	0.3149	0.3149	Yes
80	poly12_std_dist_mm	0.319767	0.324889	0.242437	0.147604	38827	2.03e-15	4.74e-13	0.3084	0.3084	Yes
81	poly12_max_dist_mm	1.36093	1.39998	1.02921	0.658255	37870	3.26e-13	7.63e-11	0.3051	0.3051	Yes
82	poly13_max_dist_mm	1.26951	1.46232	0.928284	0.68347	38594	7.26e-15	1.70e-12	0.3008	0.3008	Yes
83	inner_max_dist_mm	9.7148	2.06238	8.757	4.07569	36635	1.23e-10	2.87e-08	0.2949	0.2949	Yes
84	poly13_std_dist_mm	0.291249	0.343462	0.213542	0.152675	39424	6.88e-17	1.61e-14	0.2943	0.2943	Yes
85	circle_mean_dist_mm	1.01614	0.336735	0.927873	0.265542	31003	1.01e-02	1.00e+00	0.2917	0.2917	No
86	circle_rmse_mm	1.22281	0.428204	1.11439	0.308561	30922	1.18e-02	1.00e+00	0.2914	0.2914	No
87	circle_max_dist_mm	2.7453	1.27343	2.44404	0.74261	31657	2.51e-03	5.88e-01	0.2904	0.2904	No
88	radial_std_mm	1.21812	0.424726	1.11138	0.315245	31749	1.09e-02	1.00e+00	0.2858	0.2858	No
89	fitz_rmse_mm	0.757148	0.398832	0.668526	0.206967	30949	1.12e-02	1.00e+00	0.2805	0.2805	No
90	eft_coeff_75	9.4e-05	0.000935	-0.000157	0.000914	31444	4.03e-03	9.44e-01	0.2718	0.2718	No
91	circularity	0.906675	0.073902	0.921942	0.035962	24533	2.10e-02	1.00e+00	-0.2636	0.2636	No
92	fitz_max_dist_mm	1.90273	1.45354	1.60548	0.724136	31288	5.63e-03	1.00e+00	0.2604	0.2604	No
93	circle_std_dist_mm	0.672681	0.283262	0.61244	0.174779	30636	2.03e-02	1.00e+00	0.2571	0.2571	No
94	compactness	3.73857	0.251136	3.69451	0.087494	31393	2.10e-02	1.00e+00	0.2353	0.2353	No
95	poly_remaining_improvement_pct	19.4915	8.86134	21.5063	8.86692	23631	1.30e-02	1.00e+00	-0.2273	0.2273	No
96	fitz_std_dist_mm	0.434465	0.320907	0.37776	0.153541	29747	8.70e-02	1.00e+00	0.2268	0.2268	No
97	eft_harmonic_7_power_ratio	0.000115	0.000146	8.8e-05	9.9e-05	31483	3.70e-03	8.67e-01	0.2183	0.2183	No
98	optimal_poly_rmse_mm	1.87511	0.73154	1.72962	0.614282	29750	8.66e-02	1.00e+00	0.2158	0.2158	No
99	inner_rmse_mm	5.94299	0.97545	5.47523	3.14171	37366	3.99e-12	9.34e-10	0.1995	0.1995	Yes
100	eft_coeff_19	-0.002823	0.009449	-0.004471	0.007429	30794	1.51e-02	1.00e+00	0.1943	0.1943	No
101	eft_harmonic_8_power_ratio	6.2e-05	0.00015	4.1e-05	4.1e-05	28468	4.04e-01	1.00e+00	0.1868	0.1868	No
102	eft_coeff_15	0.002014	0.015035	-0.000635	0.013453	29765	8.47e-02	1.00e+00	0.1859	0.1859	No
103	eft_harmonic_5_power_ratio	0.000484	0.000982	0.000354	0.000327	29477	1.27e-01	1.00e+00	0.1795	0.1795	No
104	eft_coeff_31	0.000285	0.004113	-0.000391	0.003525	29228	1.75e-01	1.00e+00	0.1768	0.1768	No
105	eft_coeff_14	-0.003207	0.009595	-0.001668	0.007783	22884	2.74e-03	6.42e-01	-0.1765	0.1765	No
106	inner_mean_dist_mm	5.44714	0.927079	5.04714	3.0899	36771	6.60e-11	1.54e-08	0.174	0.174	Yes
107	eft_coeff_27	-0.001918	0.005466	-0.00106	0.004758	24678	7.77e-02	1.00e+00	-0.1677	0.1677	No
108	eft_higher_harmonic_ratio	0.001546	0.002895	0.00118	0.001217	27897	6.58e-01	1.00e+00	0.1659	0.1659	No
109	eft_coeff_42	0.000138	0.002523	-0.000239	0.002111	29464	1.29e-01	1.00e+00	0.1623	0.1623	No
110	eft_harmonic_2_power_ratio	0.005476	0.034515	0.001468	0.008815	28239	4.98e-01	1.00e+00	0.1605	0.1605	No
111	eft_coeff_9	0.001756	0.013063	-3.7e-05	0.009189	28973	2.38e-01	1.00e+00	0.1593	0.1593	No
112	eft_harmonic_10_power_ratio	2.7e-05	5e-05	2.1e-05	2.3e-05	29799	8.06e-02	1.00e+00	0.1593	0.1593	No
113	eft_coeff_69	0.000119	0.00111	-4.4e-05	0.000933	30028	5.69e-02	1.00e+00	0.1588	0.1588	No
114	eft_harmonic_1_power_ratio	0.991641	0.039582	0.996161	0.011	29290	1.62e-01	1.00e+00	-0.1569	0.1569	No
115	eft_h1_power_ratio	0.991641	0.039582	0.996161	0.011	29290	1.62e-01	1.00e+00	-0.1569	0.1569	No
116	roughness	0.008159	0.032074	0.004258	0.014827	35580	2.98e-07	6.98e-05	0.1567	0.1567	Yes
117	optimal_polygon	5.67686	0.898555	5.52941	0.983609	29671	7.18e-02	1.00e+00	0.1564	0.1564	No
118	eft_coeff_40	-6.5e-05	0.00235	0.00027	0.00204	25534	2.39e-01	1.00e+00	-0.1524	0.1524	No
119	poly10_area_ratio	0.954014	0.021075	0.951287	0.014965	29793	8.13e-02	1.00e+00	0.1497	0.1497	No
120	poly6_area_ratio	0.837583	0.047658	0.831032	0.042609	29864	7.31e-02	1.00e+00	0.1451	0.1451	No
121	eft_coeff_47	-0.000214	0.001896	4.3e-05	0.001728	25411	2.07e-01	1.00e+00	-0.142	0.142	No
122	eft_coeff_32	0.000291	0.002813	0.000656	0.002323	25462	2.20e-01	1.00e+00	-0.1415	0.1415	No
123	eft_coeff_62	-3e-06	0.00138	0.000172	0.001114	23667	1.40e-02	1.00e+00	-0.1396	0.1396	No
124	eft_coeff_8	0.02057	0.016943	0.022813	0.015308	23695	1.47e-02	1.00e+00	-0.1391	0.1391	No
125	hm_cv_female_score	2451.87	403.467	2500.14	288.287	27951	9.94e-01	1.00e+00	-0.1379	0.1379	No
126	eft_harmonic_6_power_ratio	0.000188	0.000384	0.000147	0.000197	27866	6.73e-01	1.00e+00	0.1342	0.1342	No
127	eft_coeff_68	-0.000102	0.001078	3e-05	0.000955	25209	1.61e-01	1.00e+00	-0.1301	0.1301	No
128	eft_coeff_21	0.001801	0.006562	0.001062	0.004781	29799	8.06e-02	1.00e+00	0.129	0.129	No
129	outer_theta	-0.030957	1.42703	0.149654	1.42849	25301	1.81e-01	1.00e+00	-0.1265	0.1265	No
130	poly_total_improvement_pct	74.6177	9.21542	73.4829	8.74133	29715	9.11e-02	1.00e+00	0.1264	0.1264	No
131	outer_ellipse_area_mm2	1e-06	1e-06	0	1e-06	28288	4.77e-01	1.00e+00	0.1246	0.1246	No
132	eft_coeff_34	-0.000134	0.002925	0.000249	0.003253	24673	7.71e-02	1.00e+00	-0.1238	0.1238	No
133	eft_coeff_60	-4.7e-05	0.001125	8.9e-05	0.001138	25280	1.77e-01	1.00e+00	-0.1203	0.1203	No
134	hm_cv_male_score	2468.85	408.332	2510.65	294.106	28339	8.01e-01	1.00e+00	-0.1177	0.1177	No
135	outer_b	3.90778	5.00124	3.35514	4.57821	28506	3.90e-01	1.00e+00	0.1154	0.1154	No
136	eft_coeff_20	-0.000968	0.008425	-9.9e-05	0.006662	26816	7.66e-01	1.00e+00	-0.1147	0.1147	No
137	eft_coeff_54	1.4e-05	0.001594	-0.000155	0.001366	28981	2.36e-01	1.00e+00	0.114	0.114	No
138	outer_mean_dist_mm	50.8855	98.3561	64.2294	137.404	33892	5.25e-06	1.23e-03	-0.1113	0.1113	Yes
139	eft_harmonic_4_power_ratio	0.000544	0.001328	0.000428	0.000678	26087	4.25e-01	1.00e+00	0.1099	0.1099	No
140	outer_rmse_mm	52.4829	97.9556	65.5306	137.029	33205	4.44e-05	1.04e-02	-0.1092	0.1092	Yes
141	eft_coeff_4	-0.00451	0.049817	-0.000259	0.024612	25131	1.46e-01	1.00e+00	-0.1088	0.1088	No
142	eft_coeff_48	-8.8e-05	0.001576	8e-05	0.001608	25983	3.85e-01	1.00e+00	-0.1055	0.1055	No
143	eft_coeff_5	-0.001614	0.0323	0.000845	0.009294	22547	1.25e-03	2.94e-01	-0.1043	0.1043	No
144	eft_coeff_44	0.000127	0.001976	-6.6e-05	0.001732	28859	2.70e-01	1.00e+00	0.104	0.104	No
145	poly12_area_ratio	0.973434	0.017737	0.971937	0.011257	28423	4.22e-01	1.00e+00	0.1012	0.1012	No
146	eft_coeff_36	4e-06	0.0023	-0.000216	0.002097	28521	3.84e-01	1.00e+00	0.1003	0.1003	No
147	poly_efficiency_ratio	4.8643	4.45404	-0.382607	73.6537	30472	2.72e-02	1.00e+00	0.0996	0.0996	No
148	eft_coeff_25	0.000195	0.004799	0.000623	0.003884	25948	3.72e-01	1.00e+00	-0.0982	0.0982	No
149	eft_coeff_70	2.7e-05	0.001117	-6.9e-05	0.000849	29071	2.12e-01	1.00e+00	0.0974	0.0974	No
150	outer_max_dist_mm	63.3487	99.3501	75.079	138.525	32684	1.94e-04	4.55e-02	-0.097	0.097	Yes
151	eft_coeff_18	2e-05	0.007273	-0.000656	0.006997	29017	2.26e-01	1.00e+00	0.0947	0.0947	No
152	eft_coeff_6	0.00036	0.020359	-0.001191	0.011404	29556	1.14e-01	1.00e+00	0.0945	0.0945	No
153	eft_coeff_39	0.000492	0.003104	0.000234	0.002517	28714	3.16e-01	1.00e+00	0.0914	0.0914	No
154	inner_area_ratio	1.81907	0.154647	3024.56	46632.6	27389	9.25e-01	1.00e+00	-0.0908	0.0908	No
155	inner_ellipse_area_mm2	1508.25	292.088	1.94365e+06	2.99666e+07	44516	2.37e-32	5.56e-30	-0.0908	0.0908	Yes
156	eft_coeff_55	-6.9e-05	0.001531	6.7e-05	0.001479	25808	3.22e-01	1.00e+00	-0.0902	0.0902	No
157	inner_theta	-0.054613	0.830946	-3.88406	59.5045	26946	8.35e-01	1.00e+00	0.0901	0.0901	No
158	eft_coeff_1	-0.002591	0.057391	-0.008531	0.075096	29754	8.61e-02	1.00e+00	0.0887	0.0887	No
159	fm_index	1.16867	0.081321	1.16106	0.090495	29434	3.22e-01	1.00e+00	0.0884	0.0884	No
160	inner_a	59.4643	7.32118	234.837	2797.95	39317	1.28e-16	2.99e-14	-0.0878	0.0878	Yes
161	circle_area_ratio	1.01181	0.016815	1.01303	0.0104	25919	3.61e-01	1.00e+00	-0.0875	0.0875	No
162	eft_coeff_11	0.000108	0.01984	-0.001415	0.01481	27234	9.91e-01	1.00e+00	0.0872	0.0872	No
163	eft_harmonic_9_power_ratio	3.6e-05	9.1e-05	3.1e-05	3.2e-05	27217	9.82e-01	1.00e+00	0.0865	0.0865	No
164	poly7_area_ratio	0.874736	0.031541	0.872186	0.027653	28366	4.45e-01	1.00e+00	0.0861	0.0861	No
165	inner_b	59.0819	7.28659	167.747	1768.23	39279	1.59e-16	3.72e-14	-0.0861	0.0861	Yes
166	eft_coeff_49	-7.4e-05	0.001792	6.5e-05	0.001406	25903	3.55e-01	1.00e+00	-0.0859	0.0859	No
167	eft_coeff_51	3e-05	0.00169	-0.00012	0.001841	28507	3.89e-01	1.00e+00	0.0849	0.0849	No
168	eft_coeff_57	-9.5e-05	0.001391	1.2e-05	0.00121	26812	7.64e-01	1.00e+00	-0.0828	0.0828	No
169	outer_cx	819.985	243.281	845.22	354.936	31145	7.57e-03	1.00e+00	-0.0826	0.0826	No
170	eft_coeff_66	3.5e-05	0.001048	0.000116	0.00101	25952	3.73e-01	1.00e+00	-0.079	0.079	No
171	eft_coeff_73	-2.1e-05	0.00091	-8.6e-05	0.00073	28515	3.86e-01	1.00e+00	0.0786	0.0786	No
172	eft_coeff_76	-7.3e-05	0.000892	-1e-05	0.000757	27293	9.77e-01	1.00e+00	-0.0771	0.0771	No
173	poly8_area_ratio	0.910807	0.0254	0.909163	0.021	29275	1.65e-01	1.00e+00	0.0707	0.0707	No
174	inner_cx	777.297	57.5148	860.788	1701.75	33897	5.16e-06	1.21e-03	-0.0687	0.0687	Yes
175	male_hm_score	0.597372	0.100914	0.590988	0.087224	30241	1.25e-01	1.00e+00	0.0677	0.0677	No
176	eft_coeff_72	-1.2e-05	0.000991	-7.1e-05	0.000825	28888	2.62e-01	1.00e+00	0.065	0.065	No
177	eft_harmonic_3_power_ratio	0.001338	0.002947	0.001192	0.001233	23294	6.65e-03	1.00e+00	0.065	0.065	No
178	eft_coeff_33	-0.000137	0.003768	6.9e-05	0.002488	27319	9.63e-01	1.00e+00	-0.0645	0.0645	No
179	eft_coeff_45	-0.000115	0.002253	1.3e-05	0.001696	27174	9.58e-01	1.00e+00	-0.0642	0.0642	No
180	inner_cy	487.497	39.4717	528.541	910.166	33115	5.78e-05	1.35e-02	-0.0631	0.0631	Yes
181	eft_coeff_67	8e-05	0.00118	1e-05	0.001041	27403	9.17e-01	1.00e+00	0.0623	0.0623	No
182	eft_coeff_37	-0.000193	0.002679	-4.6e-05	0.002153	27141	9.40e-01	1.00e+00	-0.0605	0.0605	No
183	eft_coeff_16	0.008364	0.010524	0.007779	0.010322	28077	5.71e-01	1.00e+00	0.0561	0.0561	No
184	eft_coeff_26	-0.000128	0.005148	0.000141	0.004818	25675	2.80e-01	1.00e+00	-0.054	0.054	No
185	female_hm_score	0.553473	0.093913	0.557995	0.079252	28253	8.46e-01	1.00e+00	-0.0521	0.0521	No
186	eft_coeff_17	0.001331	0.014505	0.000741	0.008213	27565	8.30e-01	1.00e+00	0.0504	0.0504	No
187	outer_a	5.55867	5.53572	5.29392	4.99524	28518	3.85e-01	1.00e+00	0.0503	0.0503	No
188	eccentricity	1.1795	0.078694	1.17546	0.083115	29099	4.45e-01	1.00e+00	0.0499	0.0499	No
189	poly11_area_ratio	0.964243	0.018255	0.963477	0.012457	27599	8.12e-01	1.00e+00	0.0492	0.0492	No
190	poly4_area_ratio	0.651079	0.058553	0.653859	0.055847	26640	6.75e-01	1.00e+00	-0.0486	0.0486	No
191	eft_coeff_52	-5.2e-05	0.00153	2.1e-05	0.001454	26182	4.64e-01	1.00e+00	-0.0486	0.0486	No
192	eft_coeff_58	-1.2e-05	0.00144	-7.6e-05	0.0013	28148	5.39e-01	1.00e+00	0.0469	0.0469	No
193	eft_coeff_3	-0.64033	0.151128	-0.632746	0.173071	26340	5.32e-01	1.00e+00	-0.0466	0.0466	No
194	eft_coeff_22	0.001796	0.006288	0.002073	0.00577	27183	9.63e-01	1.00e+00	-0.0458	0.0458	No
195	eft_coeff_46	1.7e-05	0.002112	0.000102	0.001726	26366	5.44e-01	1.00e+00	-0.044	0.044	No
196	eft_coeff_29	-0.000462	0.004753	-0.000289	0.002975	27435	9.00e-01	1.00e+00	-0.0436	0.0436	No
197	eft_coeff_0	0.746506	0.063255	0.743324	0.081188	26608	6.59e-01	1.00e+00	0.0436	0.0436	No
198	poly9_area_ratio	0.93497	0.022854	0.934107	0.017138	27675	7.71e-01	1.00e+00	0.0428	0.0428	No
199	poly13_area_ratio	0.97963	0.017428	0.979041	0.009595	26846	7.81e-01	1.00e+00	0.0421	0.0421	No
200	eft_coeff_24	0.00236	0.00556	0.002144	0.00471	28070	5.75e-01	1.00e+00	0.042	0.042	No
201	eft_coeff_50	0.000197	0.001945	0.000124	0.001571	27175	9.59e-01	1.00e+00	0.0414	0.0414	No
202	eft_coeff_64	-3.8e-05	0.001155	5e-06	0.000933	26466	5.91e-01	1.00e+00	-0.0413	0.0413	No
203	eft_coeff_63	-8e-06	0.001311	4.4e-05	0.001233	26965	8.45e-01	1.00e+00	-0.0407	0.0407	No
204	eft_coeff_77	4.3e-05	0.000994	7.8e-05	0.000747	26547	6.29e-01	1.00e+00	-0.0404	0.0404	No
205	eft_coeff_28	-0.000394	0.00385	-0.000264	0.003097	26135	4.44e-01	1.00e+00	-0.0374	0.0374	No
206	eft_coeff_56	-4e-05	0.001287	7e-06	0.001268	26978	8.52e-01	1.00e+00	-0.0368	0.0368	No
207	eft_coeff_65	-2.3e-05	0.001334	1.8e-05	0.000933	27120	9.29e-01	1.00e+00	-0.0354	0.0354	No
208	outer_area_ratio	0	0	0	0	26505	6.09e-01	1.00e+00	-0.0351	0.0351	No
209	eft_coeff_74	5.7e-05	0.000982	8.8e-05	0.000822	27337	9.53e-01	1.00e+00	-0.034	0.034	No
210	ap_asymmetry	0.051469	0.028267	0.05231	0.021149	25427	8.80e-02	1.00e+00	-0.0337	0.0337	No
211	poly5_area_ratio	0.736548	0.063187	0.73859	0.062921	26124	4.40e-01	1.00e+00	-0.0324	0.0324	No
212	radial_cv	0.075819	0.028708	0.076645	0.02192	25797	1.45e-01	1.00e+00	-0.0324	0.0324	No
213	eft_coeff_13	0.002426	0.011515	0.002738	0.00757	27829	6.92e-01	1.00e+00	-0.0321	0.0321	No
214	eft_coeff_78	-4.1e-05	0.000925	-1.6e-05	0.000826	26787	7.51e-01	1.00e+00	-0.0282	0.0282	No
215	eft_coeff_23	-0.000438	0.006839	-0.000254	0.006665	26954	8.39e-01	1.00e+00	-0.0272	0.0272	No
216	eft_coeff_35	-0.000445	0.003109	-0.000522	0.002818	28009	6.03e-01	1.00e+00	0.0262	0.0262	No
217	eft_coeff_2	-0.007283	0.051536	-0.005668	0.070781	29710	9.17e-02	1.00e+00	-0.026	0.026	No
218	eft_coeff_79	4.7e-05	0.000877	2.5e-05	0.000832	27496	8.67e-01	1.00e+00	0.0256	0.0256	No
219	eft_coeff_71	-2.4e-05	0.001065	-4.4e-05	0.000963	27737	7.39e-01	1.00e+00	0.0194	0.0194	No
220	lr_asymmetry	0.052517	0.031042	0.052005	0.02162	26349	2.78e-01	1.00e+00	0.0192	0.0192	No
221	eft_coeff_7	0.005956	0.060138	0.005069	0.027257	25306	1.82e-01	1.00e+00	0.0191	0.0191	No
222	eft_coeff_10	-0.000774	0.014593	-0.001005	0.012347	26980	8.53e-01	1.00e+00	0.0172	0.0172	No
223	eft_coeff_41	5.9e-05	0.002935	2.1e-05	0.00181	28499	3.92e-01	1.00e+00	0.0153	0.0153	No
224	eft_coeff_61	-2.5e-05	0.001335	-7e-06	0.001003	26629	6.70e-01	1.00e+00	-0.0153	0.0153	No
225	eft_symmetry_index	1307.21	1227.55	1323.91	1152.93	27278	9.85e-01	1.00e+00	-0.014	0.014	No
226	eft_coeff_30	-0.000243	0.003651	-0.000196	0.003216	27529	8.49e-01	1.00e+00	-0.0136	0.0136	No
227	eft_coeff_12	0.000492	0.012382	0.000644	0.011403	25855	3.38e-01	1.00e+00	-0.0128	0.0128	No
228	eft_coeff_38	-0.000146	0.002682	-0.000115	0.002434	26252	4.93e-01	1.00e+00	-0.012	0.012	No
229	poly3_area_ratio	0.341084	0.075196	0.341906	0.078248	26372	5.47e-01	1.00e+00	-0.0107	0.0107	No
230	eft_coeff_59	-7.3e-05	0.001226	-8e-05	0.001195	27203	9.74e-01	1.00e+00	0.0065	0.0065	No
231	fitz_area_ratio	1.01287	0.015731	1.0128	0.007527	25093	1.39e-01	1.00e+00	0.006	0.006	No
232	fitz_theta	1.55029	0.677767	1.54712	0.562824	27504	8.63e-01	1.00e+00	0.0051	0.0051	No
233	eft_coeff_53	0.000134	0.001556	0.000139	0.00131	26820	7.68e-01	1.00e+00	-0.0035	0.0035	No
234	eft_coeff_43	-6.4e-05	0.002623	-5.6e-05	0.001947	26602	6.56e-01	1.00e+00	-0.0033	0.0033	No
