# Supplementary material
Source: Research Square preprint supplement (doi:10.21203/rs.3.rs-8928788/v1)
Supplement: Supplementary file 6 [file b7684adcd126f512f421aa96.xlsx]

## Sheet: Sayfa1
Selection Strategy	Step	Feature Added	CV Accuracy (%)	Cumulative Features
S4: Shape only	1	area_perimeter_ratio	74.9	1
	2	circularity	77.7	2
	3	fitz_rmse_mm	79.2	3
	4	eft_coeff_48	79.7	4
	5	eft_coeff_21	80.3	5
	6	poly13_area_ratio	80.7	6
	7	eft_coeff_51	80.9	7
S5: Combined	1	perimeter_mm	78.1	1
	2	eft_coeff_10	79.2	2
	3	poly3_area_ratio	79.4	3
	4	poly7_max_dist_mm	79.6	4
	5	eft_coeff_68	80.1	5
	6	eft_coeff_40	80.5	6
S6: All (practical)	1	perimeter_mm	78.1	1
	2	eft_coeff_10	79.2	2
	3	poly3_area_ratio	79.4	3
	4	poly7_max_dist_mm	79.6	4
	5	eft_coeff_68	80.1	5
	6	eft_coeff_40	80.5	6
