# Supplementary material
Source: Research Square preprint supplement (doi:10.21203/rs.3.rs-8928788/v1)
Supplement: Supplementary file 7 [file d4276a692e05f9d9ea17d725.xlsx]

## Sheet: Sayfa1
Specimen	k	Cluster Assignment
1	2	1
2	2	1
3	2	1
4	2	1
5	2	1
6	2	1
7	2	1
8	2	1
9	2	1
10	2	1
11	2	1
12	2	1
13	2	1
14	2	1
15	2	1
16	2	1
17	2	1
18	2	1
19	2	0
20	2	0
21	2	1
22	2	1
23	2	1
24	2	0
25	2	1
26	2	0
27	2	1
28	2	1
29	2	1
30	2	0
31	2	1
32	2	0
33	2	1
34	2	1
35	2	1
36	2	1
37	2	0
38	2	1
39	2	1
40	2	1
41	2	1
42	2	1
43	2	1
44	2	1
45	2	1
46	2	1
47	2	1
48	2	1
49	2	1
50	2	1
51	2	1
52	2	1
53	2	0
54	2	1
55	2	1
56	2	0
57	2	1
58	2	1
59	2	1
60	2	0
61	2	1
62	2	1
63	2	0
64	2	1
65	2	0
66	2	1
67	2	0
68	2	1
69	2	1
70	2	1
71	2	1
72	2	0
73	2	1
74	2	0
75	2	1
76	2	1
77	2	1
78	2	0
79	2	1
80	2	1
81	2	1
82	2	1
83	2	1
84	2	1
85	2	1
86	2	1
87	2	0
88	2	1
89	2	0
90	2	1
91	2	1
92	2	0
93	2	1
94	2	0
95	2	1
96	2	1
97	2	1
98	2	0
99	2	0
100	2	1
101	2	1
102	2	0
103	2	1
104	2	0
105	2	1
106	2	1
107	2	1
108	2	1
109	2	1
110	2	1
111	2	1
112	2	1
113	2	0
114	2	1
115	2	0
116	2	1
117	2	1
118	2	1
119	2	1
120	2	1
121	2	1
122	2	1
123	2	1
124	2	0
125	2	1
126	2	1
127	2	0
128	2	1
129	2	1
130	2	1
131	2	1
132	2	1
133	2	1
134	2	1
135	2	1
136	2	1
137	2	1
138	2	1
139	2	1
140	2	1
141	2	1
142	2	1
143	2	1
144	2	1
145	2	1
146	2	1
147	2	1
148	2	0
149	2	0
150	2	1
151	2	1
152	2	1
153	2	1
154	2	1
155	2	0
156	2	1
157	2	1
158	2	0
159	2	1
160	2	1
161	2	1
162	2	1
163	2	0
164	2	1
165	2	0
166	2	0
167	2	1
168	2	0
169	2	1
170	2	1
171	2	0
172	2	0
173	2	1
174	2	1
175	2	0
176	2	0
177	2	1
178	2	1
179	2	1
180	2	1
181	2	1
182	2	0
183	2	1
184	2	0
185	2	1
186	2	0
187	2	0
188	2	1
189	2	0
190	2	0
191	2	1
192	2	1
193	2	1
194	2	0
195	2	1
196	2	1
197	2	0
198	2	1
199	2	1
200	2	1
201	2	1
202	2	0
203	2	0
204	2	1
205	2	1
206	2	0
207	2	0
208	2	1
209	2	1
210	2	1
211	2	1
212	2	1
213	2	1
214	2	0
215	2	1
216	2	1
217	2	1
218	2	1
219	2	1
220	2	1
221	2	1
222	2	1
223	2	0
224	2	1
225	2	1
226	2	1
227	2	0
228	2	1
229	2	0
1	3	2
2	3	2
3	3	2
4	3	2
5	3	2
6	3	2
7	3	2
8	3	2
9	3	2
10	3	2
11	3	2
12	3	2
13	3	2
14	3	2
15	3	2
16	3	2
17	3	2
18	3	2
19	3	1
20	3	1
21	3	2
22	3	0
23	3	2
24	3	0
25	3	2
26	3	1
27	3	2
28	3	2
29	3	2
30	3	1
31	3	2
32	3	1
33	3	2
34	3	2
35	3	2
36	3	2
37	3	1
38	3	2
39	3	2
40	3	2
41	3	2
42	3	2
43	3	2
44	3	2
45	3	2
46	3	2
47	3	2
48	3	2
49	3	2
50	3	2
51	3	2
52	3	2
53	3	1
54	3	2
55	3	2
56	3	1
57	3	2
58	3	2
59	3	2
60	3	1
61	3	2
62	3	2
63	3	0
64	3	2
65	3	1
66	3	2
67	3	1
68	3	2
69	3	2
70	3	2
71	3	2
72	3	1
73	3	2
74	3	1
75	3	2
76	3	2
77	3	2
78	3	1
79	3	2
80	3	2
81	3	2
82	3	2
83	3	2
84	3	2
85	3	2
86	3	2
87	3	1
88	3	2
89	3	1
90	3	2
91	3	2
92	3	0
93	3	2
94	3	1
95	3	2
96	3	2
97	3	2
98	3	1
99	3	1
100	3	2
101	3	2
102	3	1
103	3	2
104	3	1
105	3	2
106	3	2
107	3	2
108	3	2
109	3	2
110	3	2
111	3	2
112	3	2
113	3	1
114	3	2
115	3	1
116	3	2
117	3	2
118	3	2
119	3	2
120	3	2
121	3	2
122	3	2
123	3	2
124	3	1
125	3	2
126	3	2
127	3	0
128	3	2
129	3	2
130	3	2
131	3	2
132	3	2
133	3	2
134	3	2
135	3	2
136	3	2
137	3	2
138	3	2
139	3	2
140	3	2
141	3	2
142	3	2
143	3	2
144	3	2
145	3	2
146	3	2
147	3	2
148	3	1
149	3	1
150	3	2
151	3	2
152	3	2
153	3	2
154	3	2
155	3	1
156	3	2
157	3	2
158	3	1
159	3	2
160	3	2
161	3	2
162	3	2
163	3	0
164	3	2
165	3	1
166	3	1
167	3	2
168	3	1
169	3	2
170	3	2
171	3	1
172	3	0
173	3	2
174	3	0
175	3	0
176	3	1
177	3	2
178	3	2
179	3	2
180	3	2
181	3	0
182	3	1
183	3	2
184	3	1
185	3	2
186	3	1
187	3	1
188	3	2
189	3	1
190	3	1
191	3	2
192	3	2
193	3	2
194	3	1
195	3	2
196	3	2
197	3	1
198	3	2
199	3	2
200	3	2
201	3	2
202	3	1
203	3	1
204	3	2
205	3	2
206	3	1
207	3	1
208	3	2
209	3	2
210	3	0
211	3	2
212	3	2
213	3	2
214	3	1
215	3	2
216	3	2
217	3	2
218	3	2
219	3	2
220	3	2
221	3	2
222	3	2
223	3	0
224	3	2
225	3	2
226	3	2
227	3	1
228	3	2
229	3	1
1	4	3
2	4	3
3	4	3
4	4	3
5	4	3
6	4	3
7	4	3
8	4	3
9	4	3
10	4	3
11	4	3
12	4	0
13	4	0
14	4	3
15	4	3
16	4	3
17	4	3
18	4	3
19	4	2
20	4	2
21	4	0
22	4	1
23	4	3
24	4	1
25	4	3
26	4	2
27	4	3
28	4	3
29	4	3
30	4	2
31	4	3
32	4	2
33	4	3
34	4	3
35	4	3
36	4	3
37	4	2
38	4	3
39	4	3
40	4	0
41	4	3
42	4	3
43	4	0
44	4	3
45	4	3
46	4	3
47	4	3
48	4	0
49	4	3
50	4	0
51	4	3
52	4	3
53	4	2
54	4	0
55	4	3
56	4	2
57	4	3
58	4	0
59	4	3
60	4	2
61	4	3
62	4	0
63	4	1
64	4	3
65	4	2
66	4	3
67	4	2
68	4	3
69	4	3
70	4	3
71	4	3
72	4	2
73	4	3
74	4	2
75	4	3
76	4	3
77	4	3
78	4	2
79	4	0
80	4	3
81	4	3
82	4	3
83	4	3
84	4	0
85	4	3
86	4	0
87	4	2
88	4	0
89	4	2
90	4	0
91	4	0
92	4	1
93	4	0
94	4	2
95	4	0
96	4	0
97	4	0
98	4	2
99	4	2
100	4	3
101	4	0
102	4	2
103	4	3
104	4	2
105	4	3
106	4	3
107	4	3
108	4	3
109	4	0
110	4	3
111	4	3
112	4	3
113	4	2
114	4	3
115	4	2
116	4	3
117	4	3
118	4	3
119	4	3
120	4	3
121	4	3
122	4	3
123	4	0
124	4	2
125	4	3
126	4	3
127	4	1
128	4	3
129	4	3
130	4	0
131	4	0
132	4	3
133	4	3
134	4	0
135	4	3
136	4	3
137	4	3
138	4	0
139	4	3
140	4	3
141	4	3
142	4	0
143	4	3
144	4	3
145	4	3
146	4	3
147	4	0
148	4	2
149	4	2
150	4	3
151	4	3
152	4	3
153	4	3
154	4	3
155	4	2
156	4	0
157	4	3
158	4	2
159	4	0
160	4	3
161	4	3
162	4	3
163	4	1
164	4	0
165	4	2
166	4	2
167	4	3
168	4	2
169	4	3
170	4	3
171	4	2
172	4	1
173	4	3
174	4	1
175	4	1
176	4	2
177	4	3
178	4	3
179	4	0
180	4	3
181	4	1
182	4	2
183	4	3
184	4	2
185	4	0
186	4	2
187	4	2
188	4	0
189	4	2
190	4	1
191	4	3
192	4	3
193	4	0
194	4	1
195	4	3
196	4	0
197	4	2
198	4	0
199	4	3
200	4	0
201	4	3
202	4	2
203	4	2
204	4	3
205	4	0
206	4	2
207	4	2
208	4	3
209	4	3
210	4	1
211	4	0
212	4	3
213	4	3
214	4	2
215	4	3
216	4	3
217	4	3
218	4	3
219	4	3
220	4	3
221	4	3
222	4	0
223	4	1
224	4	3
225	4	3
226	4	0
227	4	2
228	4	0
229	4	1
230	2	0
231	2	0
232	2	1
233	2	0
234	2	0
235	2	0
236	2	0
237	2	0
238	2	1
239	2	0
240	2	1
241	2	0
242	2	0
243	2	1
244	2	0
245	2	0
246	2	0
247	2	1
248	2	0
249	2	0
250	2	0
251	2	0
252	2	1
253	2	1
254	2	0
255	2	0
256	2	0
257	2	1
258	2	0
259	2	0
260	2	1
261	2	0
262	2	0
263	2	0
264	2	0
265	2	0
266	2	0
267	2	1
268	2	0
269	2	1
270	2	0
271	2	0
272	2	1
273	2	1
274	2	1
275	2	0
276	2	1
277	2	1
278	2	1
279	2	0
280	2	0
281	2	0
282	2	0
283	2	1
284	2	0
285	2	1
286	2	0
287	2	0
288	2	0
289	2	1
290	2	0
291	2	1
292	2	0
293	2	0
294	2	0
295	2	0
296	2	0
297	2	0
298	2	0
299	2	0
300	2	0
301	2	0
302	2	0
303	2	1
304	2	0
305	2	0
306	2	0
307	2	1
308	2	0
309	2	1
310	2	0
311	2	0
312	2	0
313	2	0
314	2	0
315	2	0
316	2	0
317	2	0
318	2	0
319	2	1
320	2	1
321	2	0
322	2	1
323	2	0
324	2	0
325	2	0
326	2	0
327	2	1
328	2	1
329	2	0
330	2	1
331	2	0
332	2	1
333	2	0
334	2	1
335	2	0
336	2	0
337	2	0
338	2	0
339	2	1
340	2	0
341	2	0
342	2	0
343	2	1
344	2	0
345	2	0
346	2	0
347	2	0
348	2	1
349	2	1
350	2	1
351	2	0
352	2	0
353	2	0
354	2	1
355	2	0
356	2	0
357	2	0
358	2	1
359	2	0
360	2	0
361	2	0
362	2	1
363	2	1
364	2	0
365	2	0
366	2	0
367	2	0
368	2	0
369	2	0
370	2	0
371	2	0
372	2	0
373	2	0
374	2	1
375	2	1
376	2	0
377	2	0
378	2	0
379	2	0
380	2	1
381	2	1
382	2	1
383	2	1
384	2	0
385	2	1
386	2	0
387	2	0
388	2	0
389	2	0
390	2	0
391	2	1
392	2	0
393	2	1
394	2	0
395	2	0
396	2	0
397	2	0
398	2	0
399	2	0
400	2	0
401	2	1
402	2	0
403	2	0
404	2	0
405	2	0
406	2	0
407	2	0
408	2	0
409	2	0
410	2	0
411	2	0
412	2	0
413	2	0
414	2	0
415	2	0
416	2	0
417	2	0
418	2	0
419	2	1
420	2	0
421	2	0
422	2	1
423	2	1
424	2	0
425	2	0
426	2	0
427	2	0
428	2	0
429	2	0
430	2	0
431	2	0
432	2	0
433	2	0
434	2	0
435	2	0
436	2	0
437	2	1
438	2	0
439	2	0
440	2	1
441	2	1
442	2	0
443	2	0
444	2	1
445	2	0
446	2	0
447	2	1
448	2	0
449	2	1
450	2	0
451	2	1
452	2	0
453	2	1
454	2	0
455	2	0
456	2	1
457	2	0
458	2	1
459	2	0
460	2	1
461	2	0
462	2	0
463	2	0
464	2	1
465	2	0
466	2	1
467	2	0
230	3	1
231	3	1
232	3	2
233	3	1
234	3	1
235	3	1
236	3	1
237	3	1
238	3	2
239	3	1
240	3	2
241	3	1
242	3	1
243	3	2
244	3	1
245	3	1
246	3	1
247	3	2
248	3	0
249	3	1
250	3	1
251	3	1
252	3	2
253	3	2
254	3	1
255	3	1
256	3	1
257	3	2
258	3	1
259	3	1
260	3	2
261	3	1
262	3	1
263	3	1
264	3	1
265	3	1
266	3	1
267	3	2
268	3	1
269	3	2
270	3	1
271	3	1
272	3	2
273	3	2
274	3	2
275	3	1
276	3	2
277	3	2
278	3	2
279	3	1
280	3	1
281	3	1
282	3	1
283	3	2
284	3	1
285	3	2
286	3	1
287	3	1
288	3	1
289	3	2
290	3	0
291	3	2
292	3	1
293	3	1
294	3	1
295	3	1
296	3	1
297	3	1
298	3	1
299	3	1
300	3	1
301	3	1
302	3	0
303	3	2
304	3	1
305	3	1
306	3	1
307	3	2
308	3	1
309	3	2
310	3	1
311	3	1
312	3	1
313	3	1
314	3	1
315	3	1
316	3	1
317	3	1
318	3	1
319	3	2
320	3	2
321	3	0
322	3	2
323	3	1
324	3	0
325	3	1
326	3	1
327	3	0
328	3	2
329	3	1
330	3	0
331	3	1
332	3	2
333	3	1
334	3	2
335	3	1
336	3	1
337	3	1
338	3	1
339	3	2
340	3	1
341	3	1
342	3	1
343	3	2
344	3	0
345	3	1
346	3	1
347	3	1
348	3	2
349	3	2
350	3	2
351	3	1
352	3	1
353	3	1
354	3	2
355	3	1
356	3	1
357	3	1
358	3	2
359	3	1
360	3	1
361	3	1
362	3	2
363	3	2
364	3	1
365	3	0
366	3	1
367	3	1
368	3	1
369	3	1
370	3	1
371	3	1
372	3	1
373	3	1
374	3	2
375	3	2
376	3	1
377	3	1
378	3	1
379	3	1
380	3	2
381	3	2
382	3	2
383	3	2
384	3	1
385	3	2
386	3	1
387	3	1
388	3	1
389	3	1
390	3	1
391	3	2
392	3	0
393	3	2
394	3	1
395	3	1
396	3	1
397	3	1
398	3	1
399	3	1
400	3	1
401	3	2
402	3	1
403	3	1
404	3	1
405	3	1
406	3	1
407	3	1
408	3	1
409	3	1
410	3	1
411	3	1
412	3	1
413	3	1
414	3	1
415	3	1
416	3	1
417	3	1
418	3	0
419	3	2
420	3	1
421	3	1
422	3	2
423	3	2
424	3	1
425	3	1
426	3	1
427	3	1
428	3	1
429	3	1
430	3	1
431	3	1
432	3	1
433	3	1
434	3	1
435	3	1
436	3	1
437	3	2
438	3	1
439	3	1
440	3	2
441	3	2
442	3	1
443	3	1
444	3	2
445	3	1
446	3	1
447	3	2
448	3	1
449	3	2
450	3	1
451	3	2
452	3	1
453	3	2
454	3	1
455	3	1
456	3	2
457	3	1
458	3	2
459	3	1
460	3	2
461	3	1
462	3	1
463	3	1
464	3	2
465	3	1
466	3	2
467	3	1
230	4	0
231	4	0
232	4	2
233	4	0
234	4	0
235	4	0
236	4	0
237	4	0
238	4	2
239	4	0
240	4	2
241	4	0
242	4	0
243	4	2
244	4	0
245	4	0
246	4	0
247	4	2
248	4	3
249	4	0
250	4	0
251	4	0
252	4	2
253	4	2
254	4	0
255	4	0
256	4	0
257	4	2
258	4	0
259	4	0
260	4	2
261	4	0
262	4	0
263	4	0
264	4	0
265	4	0
266	4	0
267	4	2
268	4	3
269	4	2
270	4	0
271	4	0
272	4	2
273	4	2
274	4	1
275	4	0
276	4	2
277	4	1
278	4	2
279	4	0
280	4	0
281	4	0
282	4	0
283	4	2
284	4	0
285	4	1
286	4	0
287	4	0
288	4	0
289	4	2
290	4	3
291	4	2
292	4	0
293	4	0
294	4	0
295	4	0
296	4	0
297	4	0
298	4	0
299	4	0
300	4	0
301	4	0
302	4	3
303	4	2
304	4	0
305	4	0
306	4	0
307	4	2
308	4	0
309	4	1
310	4	0
311	4	0
312	4	0
313	4	0
314	4	0
315	4	0
316	4	0
317	4	0
318	4	0
319	4	2
320	4	2
321	4	3
322	4	1
323	4	0
324	4	3
325	4	0
326	4	0
327	4	1
328	4	2
329	4	0
330	4	1
331	4	0
332	4	1
333	4	0
334	4	2
335	4	0
336	4	0
337	4	0
338	4	0
339	4	2
340	4	0
341	4	0
342	4	0
343	4	2
344	4	1
345	4	0
346	4	0
347	4	0
348	4	2
349	4	2
350	4	2
351	4	0
352	4	0
353	4	0
354	4	2
355	4	0
356	4	0
357	4	0
358	4	2
359	4	0
360	4	0
361	4	0
362	4	2
363	4	2
364	4	0
365	4	3
366	4	0
367	4	3
368	4	0
369	4	0
370	4	0
371	4	0
372	4	3
373	4	3
374	4	2
375	4	2
376	4	3
377	4	0
378	4	0
379	4	0
380	4	2
381	4	2
382	4	2
383	4	2
384	4	0
385	4	2
386	4	3
387	4	0
388	4	0
389	4	0
390	4	3
391	4	2
392	4	3
393	4	2
394	4	0
395	4	0
396	4	0
397	4	0
398	4	0
399	4	0
400	4	0
401	4	2
402	4	0
403	4	0
404	4	0
405	4	0
406	4	0
407	4	0
408	4	0
409	4	0
410	4	0
411	4	0
412	4	0
413	4	0
414	4	0
415	4	0
416	4	0
417	4	0
418	4	3
419	4	2
420	4	0
421	4	0
422	4	2
423	4	2
424	4	3
425	4	0
426	4	0
427	4	0
428	4	0
429	4	0
430	4	0
431	4	0
432	4	0
433	4	0
434	4	0
435	4	0
436	4	0
437	4	2
438	4	0
439	4	0
440	4	2
441	4	2
442	4	0
443	4	0
444	4	2
445	4	0
446	4	3
447	4	2
448	4	0
449	4	2
450	4	0
451	4	2
452	4	0
453	4	2
454	4	0
455	4	0
456	4	2
457	4	0
458	4	2
459	4	0
460	4	2
461	4	0
462	4	0
463	4	0
464	4	2
465	4	0
466	4	2
467	4	0
